# Supplementary material for: Gene Transcript Alterations in the Spinal Cord, Anterior Cingulate Cortex, and Amygdala in Mice Following Peripheral Nerve Injury
Source: Front Cell Dev Biol. 2021 Apr 7;9:634810. doi: 10.3389/fcell.2021.634810 (PMC8059771; doi:10.3389/fcell.2021.634810)
Supplement: Supplementary file 9 [file Data_Sheet_5.XLSX]

## Sheet: Anxiety ACC
#p-value cut-off <0.05 #q-value cut-off <1.00 #Gene biotype: protein_coding #Condition pair: up_Test_vs_Control & down_Test_vs_Control Column A: Track_id, The database name in gene level. Column B: Gene_Name, The name of gene. Column C: Description of the gene Column D: Gene_Type, The biological type of gene. Column E: log2FC, if the comparison is test vs control, log2 of the fold change will be …
up_Test_vs_Control
Annotation				DE Statistic				FPKM
Track_id	Gene_Name	Description	Gene_Type	log2FC	Fold_Change	p_value	q_value	Test_FPKM	Control_FPKM	A1	A2	A3	B1	B2	B3
ENSMUSG00000030111	A2m	alpha-2-macroglobulin	ProteinCoding	1.04092	2.05754	0.000842	0.119183	9.39718	8.35626	9.38818	9.40844	9.39492	7.8691	8.41881	8.78088
ENSMUSG00000023088	Abcc1	ATP-binding cassette, sub-family C (CFTR/MRP), member 1	ProteinCoding	3.33023	10.0577	0.0124952	0.615753	3.33023	0	5.34863	0	4.64205	0	0	0
ENSMUSG00000025085	Ablim1	actin-binding LIM protein 1	ProteinCoding	0.931153	1.9068	0.0360985	0.936054	6.23557	5.30442	5.46138	7.1929	6.05245	5.22397	5.18793	5.50136
ENSMUSG00000042010	Acacb	acetyl-Coenzyme A carboxylase beta	ProteinCoding	2.07171	4.20385	0.00126615	0.16267	8.27015	6.19844	8.55185	6.3245	9.93409	6.34027	5.44435	6.81069
ENSMUSG00000090150	Acad11	acyl-Coenzyme A dehydrogenase family, member 11	ProteinCoding	0.992182	1.98919	0.00456013	0.366865	10.7093	9.71714	10.9638	10.7975	10.3667	9.11818	10.0596	9.97358
ENSMUSG00000020333	Acsl6	acyl-CoA synthetase long-chain family member 6	ProteinCoding	1.31498	2.48798	9.01e-05	0.0228581	13.9536	12.6386	14.409	14.4475	13.0042	12.7619	12.4819	12.672
ENSMUSG00000052374	Actn2	actinin alpha 2	ProteinCoding	1.30476	2.47043	0.0446407	0.994925	11.1832	9.87848	9.87062	9.7739	13.9052	10.0405	9.49143	10.1035
ENSMUSG00000029778	Adcyap1r1	adenylate cyclase activating polypeptide 1 receptor 1	ProteinCoding	1.90223	3.73791	0.0494769	0.999941	2.54795	0.645722	0	5.22218	2.42168	0	0.915561	1.0216
ENSMUSG00000025911	Adhfe1	alcohol dehydrogenase, iron containing, 1	ProteinCoding	2.60571	6.08692	0.00580998	0.420363	5.13141	2.5257	3.83279	9.13976	2.42168	1.89843	3.64639	2.03229
ENSMUSG00000049115	Agtr1a	angiotensin II receptor, type 1a	ProteinCoding	1.30715	2.47453	0.0323874	0.898775	5.80416	4.497	3.71644	6.09731	7.59872	3.87188	5.25643	4.3627
ENSMUSG00000029484	Anxa3	annexin A3	ProteinCoding	1.06847	2.09721	0.00515257	0.394759	8.74363	7.67516	8.18126	8.91779	9.13185	7.65147	8.10259	7.27143
ENSMUSG00000004655	Aqp1	aquaporin 1	ProteinCoding	2.33891	5.05921	0.00045986	0.0779585	7.46627	5.12735	9.79194	5.49545	7.1114	4.91166	5.38439	5.086
ENSMUSG00000021125	Arg2	arginase type II	ProteinCoding	0.802623	1.74427	0.0463321	0.999941	8.9896	8.18697	8.23511	8.61296	10.1207	8.29796	8.05531	8.20765
ENSMUSG00000074794	Arrdc3	arrestin domain containing 3	ProteinCoding	2.31847	4.98805	0.00010928	0.0270411	11.1372	8.81877	11.9626	12.3979	9.05119	8.66414	8.294	9.49816
ENSMUSG00000027496	Aurka	aurora kinase A	ProteinCoding	2.06483	4.18384	0.0407463	0.96655	2.71055	0.645722	6.46308	0	1.66856	0	0.915561	1.0216
ENSMUSG00000037727	Avp	arginine vasopressin	ProteinCoding	3.88047	14.7278	0.00201493	0.225926	3.88047	0	2.70497	2.2905	6.64593	0	0	0
ENSMUSG00000026432	Avpr1b	arginine vasopressin receptor 1B	ProteinCoding	3.46281	11.0258	0.00022572	0.0457115	3.46281	0	2.43732	3.66412	4.28698	0	0	0
ENSMUSG00000022641	Bbx	bobby sox HMG box containing	ProteinCoding	0.808959	1.75195	0.0208493	0.768707	11.605	10.796	10.9027	12.3309	11.5815	10.506	11.1021	10.7801
ENSMUSG00000040466	Blvrb	biliverdin reductase B (flavin reductase (NADPH))	ProteinCoding	1.60918	3.05078	0.0186876	0.730538	3.13584	1.52666	2.10845	1.20002	6.09905	1.49504	1.47124	1.6137
ENSMUSG00000024164	C3	complement component 3	ProteinCoding	1.81047	3.50755	0.00010836	0.0268797	8.31779	6.50732	8.24039	9.0508	7.66217	6.274	6.15011	7.09785
ENSMUSG00000051331	Cacna1c	calcium channel, voltage-dependent, L type, alpha 1C subunit	ProteinCoding	2.69317	6.46733	0.0402573	0.965342	9.06661	6.37344	9.00054	9.11297	9.08631	5.62047	4.87586	8.62398
ENSMUSG00000057897	Camk2b	calcium/calmodulin-dependent protein kinase II, beta	ProteinCoding	1.41303	2.66295	0.031422	0.888579	7.64688	6.23386	7.38036	6.17708	9.3832	6.07431	7.22785	5.39941
ENSMUSG00000021373	Cap2	CAP, adenylate cyclase-associated protein, 2 (yeast)	ProteinCoding	0.990189	1.98644	0.00355569	0.318266	14.3923	13.4021	14.6911	13.4861	14.9996	13.3858	13.0762	13.7443
ENSMUSG00000031628	Casp3	caspase 3	ProteinCoding	2.45919	5.49908	0.00047276	0.0794797	7.03575	4.57657	4.66049	8.01061	8.43616	5.18844	3.74505	4.79621
ENSMUSG00000034165	Ccnd3	cyclin D3	ProteinCoding	3.73759	13.3391	5.74e-06	0.0022107	8.72495	4.98737	10.0223	9.9221	6.23046	4.6754	6.07623	4.21047
ENSMUSG00000029385	Ccng2	cyclin G2	ProteinCoding	2.16462	4.48349	0.0108943	0.583502	9.59937	7.43475	10.5014	8.84232	9.45438	6.82985	6.47158	9.00281
ENSMUSG00000049103	Ccr2	chemokine (C-C motif) receptor 2	ProteinCoding	1.81609	3.52125	0.0022564	0.241399	4.6026	2.78652	4.52868	4.15918	5.11994	2.21332	3.30203	2.8442
ENSMUSG00000012819	Cdh23	cadherin 23 (otocadherin)	ProteinCoding	2.23975	4.72314	0.00180197	0.208903	5.26198	3.02223	3.45112	4.44352	7.89129	3.19916	2.65943	3.20811
ENSMUSG00000026365	Cfh	complement component factor h	ProteinCoding	2.31322	4.9699	0.00037563	0.0682515	8.1828	5.86958	8.12531	8.2446	8.17849	6.15016	4.53341	6.92517
ENSMUSG00000021919	Chat	choline acetyltransferase	ProteinCoding	1.9917	3.97706	0.0349968	0.92577	7.31853	5.32683	5.34863	5.27147	11.3355	5.59355	4.91877	5.46817
ENSMUSG00000022512	Cldn1	claudin 1	ProteinCoding	1.31126	2.48159	0.00038001	0.0689248	8.60568	7.29441	9.11413	7.88954	8.81336	7.26465	7.4992	7.11939
ENSMUSG00000029238	Clock	circadian locomotor output cycles kaput	ProteinCoding	1.1578	2.23117	0.0407522	0.96655	11.1855	10.0277	9.56472	12.6834	11.3085	10.0217	9.12079	10.9407
ENSMUSG00000053024	Cntn2	contactin 2	ProteinCoding	0.918222	1.88978	0.00482954	0.37773	12.399	11.4808	11.8284	12.562	12.8066	11.1192	11.3882	11.935
ENSMUSG00000074643	Cpne1	copine I	ProteinCoding	2.64857	6.27044	0.00126697	0.16267	10.1064	7.45782	10.4681	8.37436	11.4768	8.24705	5.68704	8.43937
ENSMUSG00000063889	Crem	cAMP responsive element modulator	ProteinCoding	2.12839	4.37228	0.00466716	0.371052	4.70603	2.57765	5.75479	4.15918	4.20413	3.45981	2.65943	1.6137
ENSMUSG00000003476	Crhr2	corticotropin releasing hormone receptor 2	ProteinCoding	1.55786	2.94417	0.00033875	0.0631384	6.56231	5.00445	6.64915	5.82754	7.21024	5.18844	4.73892	5.086
ENSMUSG00000022150	Dab2	disabled 2, mitogen-responsive phosphoprotein	ProteinCoding	3.37288	10.3595	4.19e-05	0.0122797	5.71513	2.34225	5.78399	7.33878	4.02262	3.19916	1.47124	2.35634
ENSMUSG00000034675	Dbn1	drebrin 1	ProteinCoding	1.27433	2.41887	0.0240979	0.809507	9.41174	8.13741	8.67387	11.4158	8.14556	7.24748	8.37711	8.78763
ENSMUSG00000025408	Ddit3	DNA-damage inducible transcript 3	ProteinCoding	2.02092	4.05842	0.0492876	0.999941	5.00714	2.98622	4.2223	5.72511	5.07402	4.19202	3.74505	1.0216
ENSMUSG00000032285	Dnaja4	DnaJ heat shock protein family (Hsp40) member A4	ProteinCoding	1.08193	2.11687	0.0141636	0.652997	6.56069	5.47876	6.31089	6.52073	6.85045	4.82175	5.9578	5.65674
ENSMUSG00000022789	Dnm1l	dynamin 1-like	ProteinCoding	1.07738	2.11019	0.00779741	0.494766	13.018	11.9407	12.9244	13.4422	12.6875	12.6195	11.2252	11.9773
ENSMUSG00000027478	Dnmt3b	DNA methyltransferase 3B	ProteinCoding	3.6678	12.7092	4.34e-05	0.0127034	3.6678	0	3.45112	4.44352	3.10876	0	0	0
ENSMUSG00000021478	Drd1	dopamine receptor D1	ProteinCoding	3.29604	9.82218	0.0030612	0.289002	6.31499	3.01895	4.66049	5.00621	9.27826	0.933087	4.08351	4.04025
ENSMUSG00000039358	Drd5	dopamine receptor D5	ProteinCoding	0.886987	1.84931	0.020992	0.769508	7.9996	7.11261	7.32183	8.01061	8.66637	6.8066	7.17573	7.35551
ENSMUSG00000030208	Emp1	epithelial membrane protein 1	ProteinCoding	1.17812	2.26282	0.00373884	0.327663	8.50125	7.32313	8.56031	8.40229	8.54116	7.99786	7.12167	6.84987
ENSMUSG00000022425	Enpp2	ectonucleotide pyrophosphatase/phosphodiesterase 2	ProteinCoding	1.231	2.3473	0.0147881	0.664566	14.3741	13.1431	15.3399	13.4568	14.3256	13.4241	13.8262	12.1789
ENSMUSG00000029505	Ep400	E1A binding protein p400	ProteinCoding	2.03165	4.08873	0.0463878	0.999941	11.4314	9.39972	13.8118	10.5008	9.98151	10.3688	7.6276	10.2027
ENSMUSG00000038776	Ephx1	epoxide hydrolase 1, microsomal	ProteinCoding	10.7334	1702.46	2.9e-67	3.66e-63	10.7334	0	10.5372	10.1907	11.4723	0	0	0
ENSMUSG00000024222	Fkbp5	FK506 binding protein 5	ProteinCoding	3.5593	11.7885	8.26e-05	0.0213326	3.5593	0	2.70497	4.05042	3.92252	0	0	0
ENSMUSG00000031328	Flna	filamin, alpha	ProteinCoding	1.44778	2.72788	0.0302168	0.877706	11.0196	9.57177	11.828	11.5856	9.64509	9.49246	8.5058	10.7171
ENSMUSG00000028088	Fmo5	flavin containing monooxygenase 5	ProteinCoding	1.11184	2.16121	0.032179	0.897042	6.91243	5.80059	6.31089	8.23841	6.18797	6.11274	6.03782	5.2512
ENSMUSG00000026193	Fn1	fibronectin 1	ProteinCoding	5.24283	37.8661	0.0268975	0.842785	6.57213	1.32929	1.0732	8.42425	10.2189	1.49504	1.47124	1.0216
ENSMUSG00000075415	Fnbp1	formin binding protein 1	ProteinCoding	4.3055	19.7736	0.0251773	0.82394	9.77509	5.46959	12.6605	6.89561	9.76916	6.77101	7.01696	2.62079
ENSMUSG00000030067	Foxp1	forkhead box P1	ProteinCoding	1.27173	2.41451	0.00862301	0.520214	11.35	10.0782	11.0437	11.0845	11.9217	10.8978	9.33985	9.99704
ENSMUSG00000036570	Fxyd1	FXYD domain-containing ion transport regulator 1	ProteinCoding	1.83488	3.56741	0.0281739	0.85729	7.23858	5.4037	5.59919	6.86382	9.25272	4.8674	4.41852	6.92517
ENSMUSG00000031340	Gabre	gamma-aminobutyric acid (GABA) A receptor, subunit epsilon	ProteinCoding	2.06427	4.18224	0.0101881	0.564682	5.13202	3.06774	4.59609	5.00621	5.79375	1.89843	3.01621	4.28859
ENSMUSG00000022144	Gdnf	glial cell line derived neurotrophic factor	ProteinCoding	1.84001	3.58012	0.0050709	0.391045	6.35907	4.51906	4.66049	4.75213	9.66459	5.18844	4.00604	4.3627
ENSMUSG00000031748	Gnao1	guanine nucleotide binding protein, alpha O	ProteinCoding	1.05833	2.08252	2.94e-05	0.00901282	15.4523	14.394	15.1228	15.2315	16.0027	14.3558	14.2197	14.6064
ENSMUSG00000027523	Gnas	GNAS (guanine nucleotide binding protein, alpha stimulating) complex locus	ProteinCoding	1.6303	3.09577	0.0280117	0.85675	12.6118	10.9815	11.4888	11.6151	14.7316	11.3357	10.5402	11.0687
ENSMUSG00000068696	Gpr88	G-protein coupled receptor 88	ProteinCoding	1.76667	3.40269	0.0314211	0.888579	13.6752	11.9085	11.7259	11.9764	17.3233	11.8735	11.8792	11.9729
ENSMUSG00000075706	Gpx4	glutathione peroxidase 4	ProteinCoding	3.07106	8.40392	0.00666567	0.45099	3.69487	0.623804	2.93065	2.90441	5.24955	0	1.87141	0
ENSMUSG00000020524	Gria1	glutamate receptor, ionotropic, AMPA1 (alpha 1)	ProteinCoding	5.88656	59.1606	0.0104454	0.57111	8.48855	2.60199	10.7621	3.13497	11.5686	2.47165	3.30203	2.03229
ENSMUSG00000019828	Grm1	glutamate receptor, metabotropic 1	ProteinCoding	0.99125	1.98791	0.0258079	0.830214	11.8712	10.88	11.5189	11.2695	12.8252	11.4451	10.9449	10.2499
ENSMUSG00000007850	Hnrnph1	heterogeneous nuclear ribonucleoprotein H1	ProteinCoding	0.906023	1.87387	0.00369573	0.324965	8.8182	7.91218	8.49999	9.36368	8.59092	7.90786	7.76914	8.05953
ENSMUSG00000007617	Homer1	homer scaffolding protein 1	ProteinCoding	0.864409	1.82059	0.0267142	0.839162	13.3095	12.445	12.8714	12.8764	14.1805	12.1236	12.1757	13.0358
ENSMUSG00000068329	Htra2	HtrA serine peptidase 2	ProteinCoding	2.16221	4.47599	0.021862	0.784537	3.76819	1.60598	3.94046	6.30095	1.06315	2.88078	0.915561	1.0216
ENSMUSG00000020644	Id2	inhibitor of DNA binding 2	ProteinCoding	5.51939	45.8673	0.00124103	0.161027	10.7958	5.27642	11.7974	7.82497	12.765	3.33536	6.56907	5.92482
ENSMUSG00000035551	Igfbpl1	insulin-like growth factor binding protein-like 1	ProteinCoding	2.35018	5.09886	0.00223899	0.240765	4.93646	2.58628	5.1386	2.2905	7.38027	1.89843	3.01621	2.8442
ENSMUSG00000026981	Il1rn	interleukin 1 receptor antagonist	ProteinCoding	3.00603	8.03351	0.00197913	0.222805	3.00603	0	2.70497	2.2905	4.02262	0	0	0
ENSMUSG00000041115	Iqsec2	IQ motif and Sec7 domain 2	ProteinCoding	3.0812	8.46316	0.00507318	0.391045	8.21206	5.13086	5.99849	7.54327	11.0944	6.88639	5.662	2.8442
ENSMUSG00000000555	Itga5	integrin alpha 5 (fibronectin receptor alpha)	ProteinCoding	2.05675	4.16049	0.00408277	0.346068	9.71568	7.65893	8.67387	8.49858	11.9746	7.95091	8.59117	6.4347
ENSMUSG00000029088	Kcnip4	Kv channel interacting protein 4	ProteinCoding	2.93276	7.6357	1.34e-05	0.00450598	10.0287	7.09598	7.46393	11.342	11.2803	7.00349	7.67217	6.6123
ENSMUSG00000033287	Kctd17	potassium channel tetramerisation domain containing 17	ProteinCoding	1.04909	2.06923	0.00358623	0.319119	10.4753	9.42623	10.5711	11.0103	9.84461	9.67365	8.98101	9.62404
ENSMUSG00000003308	Keap1	kelch-like ECH-associated protein 1	ProteinCoding	3.09678	8.5551	0.0007361	0.109352	4.9566	1.85982	3.71644	3.66412	7.48926	1.89843	2.65943	1.0216
ENSMUSG00000023043	Krt18	keratin 18	ProteinCoding	4.76166	27.127	0.00720885	0.472836	5.98849	1.22684	7.38036	4.15918	6.42593	3.68051	0	0
ENSMUSG00000016024	Lbp	lipopolysaccharide binding protein	ProteinCoding	1.43882	2.71099	0.0409758	0.968316	8.52548	7.08666	9.99758	7.57307	8.00579	8.06798	5.78305	7.40896
ENSMUSG00000022500	Litaf	LPS-induced TN factor	ProteinCoding	2.32999	5.02803	0.0175487	0.713849	3.60567	1.27567	2.70497	2.90441	5.20763	2.21332	0	1.6137
ENSMUSG00000020593	Lpin1	lipin 1	ProteinCoding	0.968796	1.95721	0.0242516	0.810802	6.77962	5.81083	3.58987	6.91125	9.83776	5.48056	6.23744	5.71449
ENSMUSG00000015568	Lpl	lipoprotein lipase	ProteinCoding	1.21376	2.31942	0.0106424	0.575677	11.6042	10.3905	10.8284	10.609	13.3753	10.7093	9.92539	10.5367
ENSMUSG00000026344	Lypd1	Ly6/Plaur domain containing 1	ProteinCoding	3.17086	9.00582	0.0447358	0.99536	8.68382	5.51296	8.76089	8.80095	8.48962	6.97248	7.53412	2.03229
ENSMUSG00000042622	Maff	v-maf musculoaponeurotic fibrosarcoma oncogene family, protein F (avian)	ProteinCoding	1.06056	2.08574	0.00059705	0.0939739	7.22284	6.16228	7.25039	7.45001	6.96811	6.40362	5.85108	6.23214
ENSMUSG00000015222	Map2	microtubule-associated protein 2	ProteinCoding	5.12187	34.8205	0.033537	0.912987	11.5834	6.46155	14.5752	14.3257	5.84933	6.22222	8.47738	4.68505
ENSMUSG00000063358	Mapk1	mitogen-activated protein kinase 1	ProteinCoding	0.958041	1.94267	0.0174371	0.710496	9.41506	8.45702	8.35672	9.60632	10.2822	8.60472	8.36165	8.40471
ENSMUSG00000063065	Mapk3	mitogen-activated protein kinase 3	ProteinCoding	1.44518	2.72297	0.00705751	0.466935	8.17481	6.72963	7.27117	7.10044	10.1528	6.86404	6.51417	6.81069
ENSMUSG00000020366	Mapk9	mitogen-activated protein kinase 9	ProteinCoding	0.894088	1.85843	0.00262361	0.261862	7.15901	6.26493	7.26082	7.33878	6.87744	6.22222	6.48591	6.08664
ENSMUSG00000021596	Mctp1	multiple C2 domains, transmembrane 1	ProteinCoding	2.20253	4.60287	0.0141599	0.652997	4.77574	2.57321	3.83279	2.62987	7.86457	1.49504	2.18435	4.04025
ENSMUSG00000024947	Men1	multiple endocrine neoplasia 1	ProteinCoding	4.18394	18.1757	7.78e-42	4.37e-38	11.3574	7.17351	11.0853	11.1236	11.8634	7.15845	6.93574	7.42634
ENSMUSG00000027820	Mme	membrane metallo endopeptidase	ProteinCoding	2.01167	4.0325	0.0493235	0.999941	11.1549	9.14326	9.63051	9.99728	13.837	10.2095	9.91085	7.3094
ENSMUSG00000012187	Mogat1	monoacylglycerol O-acyltransferase 1	ProteinCoding	2.12726	4.36887	0.031541	0.889768	2.43829	0.311029	2.93065	2.2905	2.09372	0.933087	0	0
ENSMUSG00000053093	Myh7	myosin, heavy polypeptide 7, cardiac muscle, beta	ProteinCoding	0.873147	1.83165	0.0399836	0.965342	9.06709	8.19394	8.73869	8.19436	10.2682	8.1534	7.97627	8.45216
ENSMUSG00000052512	Nav2	neuron navigator 2	ProteinCoding	1.86297	3.63755	0.00297693	0.283965	8.56351	6.70054	9.03739	8.0745	8.57864	5.42056	7.41929	7.26177
ENSMUSG00000021068	Nin	ninein	ProteinCoding	0.931573	1.90735	0.00049789	0.083015	11.7112	10.7796	11.147	11.9773	12.0093	10.8985	10.7619	10.6786
ENSMUSG00000029361	Nos1	nitric oxide synthase 1, neuronal	ProteinCoding	3.30449	9.87983	0.00655765	0.447125	7.94841	4.64392	7.6499	6.47937	9.71596	6.40362	1.87141	5.65674
ENSMUSG00000026826	Nr4a2	nuclear receptor subfamily 4, group A, member 2	ProteinCoding	1.06118	2.08664	0.0143751	0.65664	8.7276	7.66641	7.06059	7.26768	11.8545	7.78238	7.41929	7.79758
ENSMUSG00000028341	Nr4a3	nuclear receptor subfamily 4, group A, member 3	ProteinCoding	2.11269	4.32496	0.0469812	0.999941	4.18974	2.07705	7.14179	3.3337	2.09372	2.69067	3.54048	0
ENSMUSG00000032420	Nt5e	5 nucleotidase, ecto	ProteinCoding	1.17434	2.2569	0.0161666	0.689787	9.81964	8.6453	8.73122	8.73219	11.9955	8.31041	8.59117	9.03433
ENSMUSG00000025905	Oprk1	opioid receptor, kappa 1	ProteinCoding	2.8077	7.00166	0.0399477	0.965342	5.61451	2.80682	5.09266	4.05042	7.70046	4.6754	3.74505	0
ENSMUSG00000027584	Oprl1	opioid receptor-like 1	ProteinCoding	3.50005	11.3141	0.0120716	0.608175	10.788	7.28796	11.3425	11.5989	9.42267	8.47062	3.92418	9.46909
ENSMUSG00000052613	Pcdh15	protocadherin 15	ProteinCoding	2.41176	5.32123	0.0346305	0.921551	2.72279	0.311029	4.59609	0	3.57227	0.933087	0	0
ENSMUSG00000051323	Pcdh19	protocadherin 19	ProteinCoding	0.897323	1.86261	0.0331684	0.909723	11.4813	10.584	12.2422	11.0372	11.1646	11.232	10.2375	10.2825
ENSMUSG00000044254	Pcsk9	proprotein convertase subtilisin/kexin type 9	ProteinCoding	1.33067	2.51519	0.0289165	0.863273	7.57584	6.24518	6.84199	6.17708	9.70846	5.29252	6.36702	7.07599
ENSMUSG00000023868	Pde10a	phosphodiesterase 10A	ProteinCoding	6.25666	76.4612	1.14e-07	6.31e-05	13.5322	7.27554	12.3018	13.3156	14.9793	7.62513	5.71165	8.48985
ENSMUSG00000028525	Pde4b	phosphodiesterase 4B, cAMP specific	ProteinCoding	0.863206	1.81908	0.0471576	0.999941	9.43292	8.56971	8.83252	8.80932	10.6569	8.82899	8.14386	8.73627
ENSMUSG00000019990	Pde7b	phosphodiesterase 7B	ProteinCoding	2.67738	6.39695	0.00468021	0.371215	3.2936	0.616216	2.70497	1.84593	5.3299	0.933087	0.915561	0
ENSMUSG00000022090	Pdlim2	PDZ and LIM domain 2	ProteinCoding	3.40075	10.5616	0.0134531	0.636534	4.79668	1.39593	6.46308	6.86382	1.06315	0	3.16619	1.0216
ENSMUSG00000027400	Pdyn	prodynorphin	ProteinCoding	0.982582	1.976	0.0196666	0.748831	11.922	10.9395	11.0616	10.8006	13.9039	10.9682	10.7238	11.1263
ENSMUSG00000045573	Penk	preproenkephalin	ProteinCoding	1.55687	2.94215	0.0445161	0.994396	13.3236	11.7667	11.3177	11.3874	17.2655	11.3438	12.0726	11.8837
ENSMUSG00000041957	Pkp2	plakophilin 2	ProteinCoding	0.922912	1.89594	0.0236874	0.804745	8.67738	7.75446	8.37602	8.14892	9.50718	8.03334	7.86549	7.36455
ENSMUSG00000061718	Ppp1r1b	protein phosphatase 1, regulatory (inhibitor) subunit 1B	ProteinCoding	1.82599	3.54551	0.00704891	0.466935	4.51373	2.68774	3.45112	3.50835	6.58174	2.69067	3.01621	2.35634
ENSMUSG00000038943	Prc1	protein regulator of cytokinesis 1	ProteinCoding	3.35715	10.2472	0.0186002	0.728793	4.18104	0.823884	1.0732	5.7942	5.67572	2.47165	0	0
ENSMUSG00000029053	Prkcz	protein kinase C, zeta	ProteinCoding	0.892373	1.85623	0.0463175	0.999941	7.4424	6.55003	7.10755	6.58063	8.63903	6.25695	6.59575	6.79739
ENSMUSG00000068744	Psrc1	proline/serine-rich coiled-coil 1	ProteinCoding	2.04053	4.11396	0.00014913	0.0332525	7.78687	5.74634	8.45531	8.55442	6.35089	5.67284	6.13199	5.4342
ENSMUSG00000028382	Ptbp3	polypyrimidine tract binding protein 3	ProteinCoding	2.32386	5.00669	0.0208225	0.768276	7.50772	5.18386	7.94315	6.95716	7.62284	6.8066	5.38439	3.36059
ENSMUSG00000042129	Rassf4	Ras association (RalGDS/AF-6) domain family member 4	ProteinCoding	2.06213	4.17603	0.0172334	0.706402	3.4638	1.40166	2.10845	4.26032	4.02262	0.933087	0.915561	2.35634
ENSMUSG00000026970	Rbms1	RNA binding motif, single stranded interacting protein 1	ProteinCoding	1.12221	2.17681	0.0167765	0.701092	6.57424	5.45202	6.42651	6.61922	6.67698	6.18664	5.04032	5.12911
ENSMUSG00000012705	Retn	resistin	ProteinCoding	1.8342	3.56574	0.00142576	0.176401	5.17638	3.34218	4.94534	4.68094	5.90286	2.69067	3.83739	3.49847
ENSMUSG00000042671	Rgs8	regulator of G-protein signaling 8	ProteinCoding	1.4276	2.68999	0.04413	0.993874	10.5722	9.14455	9.16773	9.34077	13.2079	8.96909	8.75994	9.70462
ENSMUSG00000020580	Rock2	Rho-associated coiled-coil containing protein kinase 2	ProteinCoding	1.24071	2.36315	0.0180433	0.720959	5.74127	4.50056	6.38899	6.3245	4.51032	4.6754	4.78603	4.04025
ENSMUSG00000039153	Runx2	runt related transcription factor 2	ProteinCoding	2.10219	4.2936	0.040343	0.965342	2.10219	0	2.10845	3.13497	1.06315	0	0	0
ENSMUSG00000037411	Serpine1	serine (or cysteine) peptidase inhibitor, clade E, member 1	ProteinCoding	0.999195	1.99888	0.0472675	0.999941	7.30404	6.30484	6.27019	6.91125	8.73068	6.20454	5.87307	6.83692
ENSMUSG00000054766	Set	SET nuclear oncogene	ProteinCoding	1.3419	2.53485	0.046553	0.999941	11.6335	10.2916	10.8301	9.94507	14.1253	10.6998	10.2977	9.87731
ENSMUSG00000034269	Setd5	SET domain containing 5	ProteinCoding	1.89003	3.70643	0.0235038	0.803673	9.84482	7.95479	8.03102	8.34587	13.1576	7.96147	7.84895	8.05395
ENSMUSG00000023942	Slc29a1	solute carrier family 29 (nucleoside transporters), member 1	ProteinCoding	5.5645	47.324	0.00040228	0.0718047	6.52125	0.956751	9.13977	9.36084	1.06315	0.933087	0.915561	1.0216
ENSMUSG00000036169	Sostdc1	sclerostin domain containing 1	ProteinCoding	1.16843	2.24767	0.0192431	0.7422	7.78563	6.6172	9.4487	6.39292	7.51526	6.55081	6.41276	6.88801
ENSMUSG00000018593	Sparc	secreted acidic cysteine rich glycoprotein	ProteinCoding	1.60909	3.0506	0.0447079	0.99536	13.5477	11.9386	13.1023	13.0765	14.4642	12.2763	10.2533	13.2861
ENSMUSG00000021990	Spata13	spermatogenesis associated 13	ProteinCoding	1.71663	3.28667	0.00662783	0.449813	7.59172	5.87509	8.31231	4.05042	10.4124	5.81943	6.63488	5.17096
ENSMUSG00000029304	Spp1	secreted phosphoprotein 1	ProteinCoding	2.61724	6.13576	0.0331588	0.909723	7.98036	5.36312	8.30729	7.42844	8.20536	4.11839	4.47711	7.49386
ENSMUSG00000039629	Strip2	striatin interacting protein 2	ProteinCoding	2.24481	4.73974	0.00133544	0.168314	7.45328	5.20847	7.56833	5.00621	9.78528	4.6754	5.00093	5.94908
ENSMUSG00000061762	Tac1	tachykinin 1	ProteinCoding	1.96394	3.90127	0.030148	0.8762	10.0122	8.04825	8.39507	7.99602	13.6455	8.05817	7.52025	8.56634
ENSMUSG00000033083	Tbc1d4	TBC1 domain family, member 4	ProteinCoding	1.59601	3.02306	0.010982	0.58539	5.49506	3.89905	5.72498	3.8047	6.9555	4.26207	4.22697	3.20811
ENSMUSG00000032366	Tpm1	tropomyosin 1, alpha	ProteinCoding	2.29128	4.8949	0.00015918	0.0347201	8.52357	6.23229	7.46393	7.69551	10.4113	6.09365	6.35144	6.25177
ENSMUSG00000027940	Tpm3	tropomyosin 3, gamma	ProteinCoding	1.75652	3.37882	0.0198915	0.753608	6.85161	5.0951	9.67405	6.37047	4.51032	6.25695	5.52987	3.49847
ENSMUSG00000005892	Trh	thyrotropin releasing hormone	ProteinCoding	1.87907	3.67838	0.00644898	0.444001	6.7505	4.87143	5.59919	5.49545	9.15685	5.7722	4.15702	4.68505
ENSMUSG00000059552	Trp53	transformation related protein 53	ProteinCoding	2.02139	4.05975	0.00354931	0.318266	5.18581	3.16442	2.10845	6.09731	7.35168	3.33536	2.65943	3.49847
ENSMUSG00000061808	Ttr	transthyretin	ProteinCoding	6.85666	115.894	0.00911821	0.534507	13.7077	6.85105	17.2008	9.43031	14.492	7.47836	7.541	5.5338
ENSMUSG00000038393	Txnip	thioredoxin interacting protein	ProteinCoding	0.895552	1.86032	0.0216249	0.77984	10.2628	9.36721	9.61231	10.788	10.388	9.5961	8.79203	9.71349
ENSMUSG00000001403	Ube2c	ubiquitin-conjugating enzyme E2C	ProteinCoding	2.31354	4.971	0.0477181	0.999941	2.93734	0.623804	3.83279	2.2905	2.68873	0	1.87141	0
ENSMUSG00000001228	Uhrf1	ubiquitin-like, containing PHD and RING finger domains, 1	ProteinCoding	1.19815	2.29445	0.02151	0.77984	6.77301	5.57486	6.27019	6.45824	7.59059	5.25866	6.25429	5.21164
ENSMUSG00000025860	Xiap	X-linked inhibitor of apoptosis	ProteinCoding	1.83509	3.56794	0.00449336	0.364082	12.7698	10.9347	12.972	12.2335	13.1038	10.3658	10.188	12.2502
ENSMUSG00000022708	Zbtb20	zinc finger and BTB domain containing 20	ProteinCoding	1.1268	2.18374	9.72e-07	0.00045102	14.9531	13.8263	14.7855	14.8699	15.2038	14.1386	13.8905	13.4498
down_Test_vs_Control
Annotation				DE Statistic				FPKM
Track_id	Gene_Name	Description	Gene_Type	log2FC	Fold_Change	p_value	q_value	Test_FPKM	Control_FPKM	A1	A2	A3	B1	B2	B3
ENSMUSG00000029802	Abcg2	ATP-binding cassette, sub-family G (WHITE), member 2	ProteinCoding	-0.801107	0.573909	0.0102399	0.566833	9.37112	10.1722	9.25113	9.33788	9.52436	10.4243	10.5221	9.57031
ENSMUSG00000020917	Acly	ATP citrate lyase	ProteinCoding	-5.35204	0.0244837	0.0077306	0.492907	4.38106	9.7331	4.2223	5.22218	3.69871	12.3498	4.47711	12.3724
ENSMUSG00000051149	Adnp	activity-dependent neuroprotective protein	ProteinCoding	-1.37962	0.38432	0.00075092	0.109652	11.7163	13.0959	12.0414	11.307	11.8005	14.0017	13.1039	12.1821
ENSMUSG00000028393	Alad	aminolevulinate, delta-, dehydratase	ProteinCoding	-3.97617	0.0635408	8.82e-06	0.00321013	2.81948	6.79565	3.12575	3.66412	1.66856	8.07286	4.22697	8.08712
ENSMUSG00000031543	Ank1	ankyrin 1, erythroid	ProteinCoding	-2.83123	0.140513	0.00355621	0.318266	9.13975	11.971	7.80039	11.0443	8.57452	12.1341	11.6967	12.0821
ENSMUSG00000058589	Anks1b	ankyrin repeat and sterile alpha motif domain containing 1B	ProteinCoding	-1.48511	0.357222	0.0498154	0.999941	7.85727	9.34238	7.38989	7.58286	8.59905	7.5571	7.78081	12.6892
ENSMUSG00000015522	Arnt	aryl hydrocarbon receptor nuclear translocator	ProteinCoding	-1.67637	0.312869	0.0137105	0.641739	5.64336	7.31973	6.77084	4.68094	5.47831	7.17671	7.10319	7.6793
ENSMUSG00000057789	Bak1	BCL2-antagonist/killer 1	ProteinCoding	-0.945065	0.519406	0.0312731	0.887317	8.38631	9.33138	7.93014	8.5394	8.68939	10.0834	9.56418	8.34654
ENSMUSG00000020423	Btg2	B cell translocation gene 2, anti-proliferative	ProteinCoding	-0.802981	0.573164	0.00018614	0.0392478	11.0391	11.8421	11.11	11.1617	10.8455	12.1091	11.8068	11.6104
ENSMUSG00000053819	Camk2d	calcium/calmodulin-dependent protein kinase II, delta	ProteinCoding	-3.12782	0.114402	7.31e-06	0.00274858	1.52923	4.65705	1.0732	1.84593	1.66856	4.6754	4.00604	5.2897
ENSMUSG00000000058	Cav2	caveolin 2	ProteinCoding	-1.20898	0.432575	0.0285607	0.85897	5.96089	7.16987	6.55065	6.1244	5.20763	6.55081	6.87167	8.08712
ENSMUSG00000027793	Ccna1	cyclin A1	ProteinCoding	-4.81441	0.0355401	7e-08	3.93e-05	0	4.81441	0	0	0	5.48056	5.22259	3.74008
ENSMUSG00000030399	Ckm	creatine kinase, muscle	ProteinCoding	-1.02889	0.490087	0.0457498	0.999941	3.90912	4.93801	4.2223	3.93278	3.57227	4.19202	5.22259	5.39941
ENSMUSG00000055022	Cntn1	contactin 1	ProteinCoding	-7.18231	0.0068851	3.54e-06	0.00146294	5.57455	12.7569	6.81395	2.90441	7.00529	12.9454	13.4989	11.8263
ENSMUSG00000032060	Cryab	crystallin, alpha B	ProteinCoding	-4.92304	0.0329622	1.94e-10	1.59e-07	0	4.92304	0	0	0	4.72585	4.83164	5.21164
ENSMUSG00000027797	Dclk1	doublecortin-like kinase 1	ProteinCoding	-0.811566	0.569763	0.0269056	0.842785	13.8434	14.655	13.7588	13.8521	13.9193	13.9435	15.9447	14.0767
ENSMUSG00000078812	Eif5a	eukaryotic translation initiation factor 5A	ProteinCoding	-2.27913	0.206021	0.0083589	0.512326	8.95658	11.2357	10.5795	8.20709	8.08318	10.5495	10.4913	12.6663
ENSMUSG00000045394	Epcam	epithelial cell adhesion molecule	ProteinCoding	-3.10393	0.116312	0.0430232	0.984499	1.04499	4.14891	0	3.13497	0	4.62312	4.78603	3.0376
ENSMUSG00000021750	Fam107a	family with sequence similarity 107, member A	ProteinCoding	-1.42547	0.372298	0.0415404	0.973865	10.6077	12.0331	10.3164	10.6492	10.8574	10.087	15.1015	10.9109
ENSMUSG00000055197	Fev	FEV (ETS oncogene family)	ProteinCoding	-3.03986	0.121593	0.0025489	0.258484	0	3.03986	0	0	0	2.21332	3.16619	3.74008
ENSMUSG00000030357	Fkbp4	FK506 binding protein 4	ProteinCoding	-1.4427	0.367878	6.17e-05	0.0168639	8.57705	10.0197	8.28192	8.3687	9.08052	9.66882	10.3977	9.99267
ENSMUSG00000040181	Fmo1	flavin containing monooxygenase 1	ProteinCoding	-1.12458	0.458637	0.0277038	0.852223	3.99167	5.11625	3.83279	4.44352	3.69871	4.77459	4.83164	5.74252
ENSMUSG00000000838	Fmr1	fragile X mental retardation syndrome 1	ProteinCoding	-2.84633	0.139049	0.0168684	0.701092	2.23575	5.08208	0	3.13497	3.57227	8.45948	3.42617	3.36059
ENSMUSG00000019843	Fyn	Fyn proto-oncogene	ProteinCoding	-1.11141	0.46284	0.0168332	0.701092	7.86956	8.98097	7.93666	8.08142	7.59059	7.59152	7.58827	11.7631
ENSMUSG00000010803	Gabra1	gamma-aminobutyric acid (GABA) A receptor, subunit alpha 1	ProteinCoding	-0.929426	0.525067	0.02036	0.760243	9.1062	10.0356	9.3275	9.53242	8.45868	9.62463	10.1714	10.3108
ENSMUSG00000033676	Gabrb3	gamma-aminobutyric acid (GABA) A receptor, subunit beta 3	ProteinCoding	-1.87504	0.27262	0.00705953	0.466935	4.00342	5.87846	4.45797	4.44352	3.10876	6.18664	7.6015	3.84722
ENSMUSG00000055737	Ghr	growth hormone receptor	ProteinCoding	-1.85256	0.2769	0.0170232	0.702637	5.621	7.47356	4.45797	6.92671	5.47831	7.493	7.18455	7.74313
ENSMUSG00000049583	Grm5	glutamate receptor, metabotropic 5	ProteinCoding	-1.72746	0.301983	0.0452947	0.99717	6.03956	7.76702	5.89522	6.1244	6.09905	5.69833	5.52987	12.0729
ENSMUSG00000006611	Hfe	hemochromatosis	ProteinCoding	-2.80083	0.143505	0.0391719	0.960218	0	2.80083	0	0	0	4.19202	0	4.21047
ENSMUSG00000038412	Higd1a	HIG1 domain family, member 1A	ProteinCoding	-3.29959	0.10156	0.0235025	0.803673	1.03625	4.33585	0	0	3.10876	3.77936	5.18793	4.04025
ENSMUSG00000029328	Hnrnpdl	heterogeneous nuclear ribonucleoprotein D-like	ProteinCoding	-1.29117	0.408621	0.00019765	0.0410403	11.3572	12.6484	10.8258	11.3114	11.9346	12.627	12.3636	12.9547
ENSMUSG00000053004	Hrh1	histamine receptor H1	ProteinCoding	-0.989479	0.50366	0.0329677	0.90692	7.9563	8.94578	7.23989	8.01785	8.61116	9.04307	9.13678	8.65749
ENSMUSG00000016194	Hsd11b1	hydroxysteroid 11-beta dehydrogenase 1	ProteinCoding	-0.905596	0.533812	0.00576597	0.419777	9.15489	10.0605	9.08509	9.64891	8.73068	10.0267	10.1332	10.0216
ENSMUSG00000020053	Igf1	insulin-like growth factor 1	ProteinCoding	-2.63615	0.160857	0.0443212	0.994241	0	2.63615	0	0	0	4.26207	3.64639	0
ENSMUSG00000027776	Il12a	interleukin 12a	ProteinCoding	-3.36406	0.0971222	0.0115626	0.596574	2.98015	6.3442	4.78126	4.15918	0	6.29085	5.9578	6.78396
ENSMUSG00000022957	Itsn1	intersectin 1 (SH3 domain protein 1A)	ProteinCoding	-1.58433	0.333479	0.00421799	0.351639	3.20889	4.79322	3.71644	2.62987	3.28035	4.51251	4.91877	4.94837
ENSMUSG00000063142	Kcnma1	potassium large conductance calcium-activated channel, subfamily M, alpha member 1	ProteinCoding	-8.01863	0.00385613	4.11e-42	2.44e-38	0	8.01863	0	0	0	8.09222	7.96096	8.00272
ENSMUSG00000045095	Magi1	membrane associated guanylate kinase, WW and PDZ domain containing 1	ProteinCoding	-1.41946	0.373852	2.77e-06	0.00116244	8.84696	10.2664	8.59368	8.91392	9.0333	10.1507	9.91218	10.7364
ENSMUSG00000046709	Mapk10	mitogen-activated protein kinase 10	ProteinCoding	-3.70842	0.0764986	2.67e-05	0.00837828	3.74712	7.45554	4.66049	4.15918	2.42168	8.77909	4.87586	8.71167
ENSMUSG00000021936	Mapk8	mitogen-activated protein kinase 8	ProteinCoding	-3.20814	0.108206	0.0211697	0.7718	0	3.20814	0	0	0	5.03683	4.5876	0
ENSMUSG00000041607	Mbp	myelin basic protein	ProteinCoding	-2.36353	0.194315	0.00050319	0.0836502	4.18432	6.54785	3.83279	4.35483	4.36533	4.26207	8.36165	7.01983
ENSMUSG00000020184	Mdm2	transformed mouse 3T3 cell double minute 2	ProteinCoding	-1.18561	0.43964	0.023137	0.799032	7.45871	8.64431	8.15356	7.27978	6.94278	7.6901	7.00706	11.2358
ENSMUSG00000005583	Mef2c	myocyte enhancer factor 2C	ProteinCoding	-3.96523	0.0640247	0.0297847	0.8762	7.57604	11.5413	6.20691	7.01619	9.50502	14.2688	13.9551	6.39993
ENSMUSG00000005373	Mlxipl	MLX interacting protein-like	ProteinCoding	-2.35542	0.195411	1.6e-05	0.00531275	4.76247	7.11789	4.45797	5.31914	4.51032	7.5847	5.99836	7.77061
ENSMUSG00000031337	Mtm1	X-linked myotubular myopathy gene 1	ProteinCoding	-2.02276	0.246087	2.03e-11	1.85e-08	6.93449	8.95725	6.8558	6.84766	7.09999	8.95065	8.57449	9.3466
ENSMUSG00000022346	Myc	myelocytomatosis oncogene	ProteinCoding	-2.02546	0.245627	0.00128745	0.164519	3.73351	5.75897	3.71644	4.05042	3.43368	6.82985	6.50011	3.94696
ENSMUSG00000024589	Nedd4l	neural precursor cell expressed, developmentally down-regulated gene 4-like	ProteinCoding	-1.69273	0.309341	0.00430564	0.356013	8.27212	9.96485	7.72711	8.87856	8.21068	6.84134	11.8727	11.1805
ENSMUSG00000021365	Nedd9	neural precursor cell expressed, developmentally down-regulated gene 9	ProteinCoding	-1.1955	0.436636	0.0214468	0.77854	4.54135	5.73685	4.59609	4.05042	4.97754	6.32398	6.03782	4.84873
ENSMUSG00000004891	Nes	nestin	ProteinCoding	-1.28811	0.409487	0.00415006	0.348555	7.82327	9.11138	8.1081	8.3687	6.993	9.24684	9.01106	9.07623
ENSMUSG00000003847	Nfat5	nuclear factor of activated T cells 5	ProteinCoding	-1.61842	0.325691	0.00040796	0.0721324	11.0708	12.6892	11.8532	10.2807	11.0785	12.3468	13.1321	12.5888
ENSMUSG00000028565	Nfia	nuclear factor I/A	ProteinCoding	-2.38718	0.191155	0.021639	0.77984	3.46354	5.85072	3.12575	5.17114	2.09372	6.44938	4.83164	6.27114
ENSMUSG00000001911	Nfix	nuclear factor I/X	ProteinCoding	-1.53693	0.344617	0.00275059	0.269375	8.42919	9.96612	8.79357	9.04017	7.45383	9.6656	9.8019	10.4309
ENSMUSG00000028163	Nfkb1	nuclear factor of kappa light polypeptide gene enhancer in B cells 1, p105	ProteinCoding	-1.83712	0.279881	0.0208828	0.7693	2.36727	4.20439	2.70497	3.3337	1.06315	3.19916	8.39241	1.0216
ENSMUSG00000024431	Nr3c1	nuclear receptor subfamily 3, group C, member 1	ProteinCoding	-1.38841	0.381984	0.00962337	0.549301	7.27432	8.66273	7.68902	7.24318	6.89075	7.5983	6.94614	11.4438
ENSMUSG00000042834	Nrep	neuronal regeneration related protein	ProteinCoding	-0.846801	0.556016	0.0382025	0.955804	10.8578	11.7046	10.0705	11.156	11.347	11.5729	11.8319	11.7091
ENSMUSG00000062991	Nrg1	neuregulin 1	ProteinCoding	-1.3109	0.403071	0.0283913	0.858315	5.85757	7.16846	5.99849	6.5002	5.07402	8.01824	5.50192	7.98523
ENSMUSG00000066392	Nrxn3	neurexin III	ProteinCoding	-1.90127	0.267707	0.044975	0.99536	5.73774	7.63901	6.02319	5.86013	5.3299	5.3896	5.50192	12.0255
ENSMUSG00000057406	Nsd2	nuclear receptor binding SET domain protein 2	ProteinCoding	-0.844	0.557097	0.0137818	0.642179	10.7627	11.6067	10.6256	10.9058	10.7566	11.7471	12.2577	10.8152
ENSMUSG00000053965	Pde5a	phosphodiesterase 5A, cGMP-specific	ProteinCoding	-1.04541	0.484508	0.034081	0.918634	8.34939	9.3948	9.05845	8.4405	7.54923	9.46858	9.10694	9.60889
ENSMUSG00000074818	Pdzd7	PDZ domain containing 7	ProteinCoding	-2.35212	0.195859	0.0176329	0.714972	1.31322	3.66533	0	1.84593	2.09372	2.47165	6.168	2.35634
ENSMUSG00000026773	Pfkfb3	6-phosphofructo-2-kinase/fructose-2,6-biphosphatase 3	ProteinCoding	-3.12542	0.114592	0.0260192	0.831988	0	3.12542	0	0	0	0	4.87586	4.5004
ENSMUSG00000024247	Pkdcc	protein kinase domain containing, cytoplasmic	ProteinCoding	-0.821484	0.565859	0.0215661	0.77984	8.81812	9.6396	9.29996	8.37999	8.77441	9.50334	9.44633	9.96914
ENSMUSG00000022565	Plec	plectin	ProteinCoding	-2.5612	0.169434	0.00949831	0.544445	6.86931	9.43051	7.01206	8.56928	5.02659	7.67734	9.20336	11.4108
ENSMUSG00000041757	Plekha6	pleckstrin homology domain containing, family A member 6	ProteinCoding	-0.831158	0.562078	0.00392785	0.336578	12.5271	13.3582	12.283	12.7435	12.5546	13.2822	12.8684	13.924
ENSMUSG00000038583	Pln	phospholamban	ProteinCoding	-1.4025	0.378273	0.0449509	0.99536	2.93145	4.33395	3.58987	2.2905	2.91398	3.45981	3.74505	5.79699
ENSMUSG00000045731	Pnoc	prepronociceptin	ProteinCoding	-0.828373	0.563164	0.00598237	0.423397	8.30036	9.12874	8.61415	8.25689	8.03005	9.12054	8.82623	9.43943
ENSMUSG00000020612	Prkar1a	protein kinase, cAMP dependent regulatory, type I, alpha	ProteinCoding	-0.846583	0.5561	0.0387562	0.957223	14.108	14.9546	13.9505	14.667	13.7066	15.6461	13.6288	15.589
ENSMUSG00000001847	Rac1	RAS-related C3 botulinum substrate 1	ProteinCoding	-1.75624	0.296018	0.0099251	0.557739	2.56719	4.32344	2.10845	2.90441	2.68873	7.6901	2.65943	2.62079
ENSMUSG00000023015	Racgap1	Rac GTPase-activating protein 1	ProteinCoding	-3.98681	0.0630738	0.00074463	0.109652	3.43406	7.42087	1.0732	4.35483	4.87414	8.1898	4.63982	9.433
ENSMUSG00000062115	Rai1	retinoic acid induced 1	ProteinCoding	-1.93774	0.261024	0.00255607	0.258951	2.66039	4.59813	2.43732	2.62987	2.91398	5.62047	4.22697	3.94696
ENSMUSG00000024968	Rcor2	REST corepressor 2	ProteinCoding	-1.02664	0.490851	0.030705	0.883288	8.29923	9.32587	8.70855	8.59854	7.59059	9.95713	9.44633	8.57416
ENSMUSG00000019970	Sgk1	serum/glucocorticoid regulated kinase 1	ProteinCoding	-1.78211	0.290757	0.0274705	0.849178	2.46359	4.2457	3.45112	1.84593	2.09372	2.69067	4.96043	5.086
ENSMUSG00000027333	Smox	spermine oxidase	ProteinCoding	-7.20797	0.00676369	1.35e-27	4.26e-24	0	7.20797	0	0	0	6.82985	7.22785	7.56622
ENSMUSG00000020027	Socs2	suppressor of cytokine signaling 2	ProteinCoding	-1.87974	0.271733	0.0489688	0.999941	5.89973	7.77947	3.94046	6.72916	7.02955	7.22135	8.30617	7.81088
ENSMUSG00000020867	Spata20	spermatogenesis associated 20	ProteinCoding	-2.1839	0.220079	0.0421176	0.978291	2.01005	4.19396	3.12575	2.90441	0	4.11839	3.83739	4.62609
ENSMUSG00000041459	Tardbp	TAR DNA binding protein	ProteinCoding	-1.23271	0.425518	0.00261428	0.261447	9.47769	10.7104	9.26673	9.50176	9.66459	11.6743	10.0196	10.4373
ENSMUSG00000006764	Tph2	tryptophan hydroxylase 2	ProteinCoding	-0.85922	0.55125	0.0395241	0.963901	5.64245	6.50167	5.53193	5.68928	5.70614	6.03484	7.27814	6.19204
ENSMUSG00000027363	Usp8	ubiquitin specific peptidase 8	ProteinCoding	-2.09629	0.233858	0.0120313	0.607335	1.45564	3.55194	1.0732	1.20002	2.09372	2.69067	6.35144	1.6137
ENSMUSG00000046230	Vps13a	vacuolar protein sorting 13A	ProteinCoding	-1.02256	0.492243	0.0395148	0.963901	7.64162	8.66418	8.04315	7.10044	7.78128	8.14878	9.90018	7.94358
ENSMUSG00000039137	Whrn	whirlin	ProteinCoding	-1.72757	0.301961	0.00015211	0.0338348	7.78917	9.51674	7.5767	7.71346	8.07737	8.39858	9.92144	10.2302

## Sheet: Depression ACC
#p-value cut-off <0.05 #q-value cut-off <1.00 #Gene biotype: protein_coding #Condition pair: up_Test_vs_Control & down_Test_vs_Control Column A: Track_id, The database name in gene level. Column B: Gene_Name, The name of gene. Column C: Description of the gene Column D: Gene_Type, The biological type of gene. Column E: log2FC, if the comparison is test vs control, log2 of the fold change will be …
up_Test_vs_Control
Annotation				DE Statistic				FPKM
Track_id	Gene_Name	Description	Gene_Type	log2FC	Fold_Change	p_value	q_value	Test_FPKM	Control_FPKM	A1	A2	A3	B1	B2	B3
ENSMUSG00000030111	A2m	alpha-2-macroglobulin	ProteinCoding	1.04092	2.05754	0.000842	0.119183	9.39718	8.35626	9.38818	9.40844	9.39492	7.8691	8.41881	8.78088
ENSMUSG00000023088	Abcc1	ATP-binding cassette, sub-family C (CFTR/MRP), member 1	ProteinCoding	3.33023	10.0577	0.0124952	0.615753	3.33023	0	5.34863	0	4.64205	0	0	0
ENSMUSG00000022822	Abcc5	ATP-binding cassette, sub-family C (CFTR/MRP), member 5	ProteinCoding	1.51885	2.86562	0.0344569	0.919884	7.4541	5.93526	6.56754	7.94376	7.85101	6.20454	4.63982	6.9614
ENSMUSG00000025085	Ablim1	actin-binding LIM protein 1	ProteinCoding	0.931153	1.9068	0.0360985	0.936054	6.23557	5.30442	5.46138	7.1929	6.05245	5.22397	5.18793	5.50136
ENSMUSG00000042010	Acacb	acetyl-Coenzyme A carboxylase beta	ProteinCoding	2.07171	4.20385	0.00126615	0.16267	8.27015	6.19844	8.55185	6.3245	9.93409	6.34027	5.44435	6.81069
ENSMUSG00000069601	Ank3	ankyrin 3, epithelial	ProteinCoding	1.13051	2.18936	0.00285839	0.276039	8.39482	7.26432	8.43244	8.38559	8.36643	7.05373	6.83853	7.90069
ENSMUSG00000029484	Anxa3	annexin A3	ProteinCoding	1.06847	2.09721	0.00515257	0.394759	8.74363	7.67516	8.18126	8.91779	9.13185	7.65147	8.10259	7.27143
ENSMUSG00000004655	Aqp1	aquaporin 1	ProteinCoding	2.33891	5.05921	0.00045986	0.0779585	7.46627	5.12735	9.79194	5.49545	7.1114	4.91166	5.38439	5.086
ENSMUSG00000021125	Arg2	arginase type II	ProteinCoding	0.802623	1.74427	0.0463321	0.999941	8.9896	8.18697	8.23511	8.61296	10.1207	8.29796	8.05531	8.20765
ENSMUSG00000031511	Arhgef7	Rho guanine nucleotide exchange factor (GEF7)	ProteinCoding	0.846547	1.79819	0.0481939	0.999941	9.92662	9.08007	10.6396	9.61589	9.52436	8.95065	8.60108	9.6885
ENSMUSG00000074794	Arrdc3	arrestin domain containing 3	ProteinCoding	2.31847	4.98805	0.00010928	0.0270411	11.1372	8.81877	11.9626	12.3979	9.05119	8.66414	8.294	9.49816
ENSMUSG00000030509	Asb7	ankyrin repeat and SOCS box-containing 7	ProteinCoding	0.896282	1.86126	0.00223815	0.240765	10.7363	9.83998	10.3776	10.5515	11.2797	9.63787	9.90553	9.97654
ENSMUSG00000038539	Atf5	activating transcription factor 5	ProteinCoding	1.30094	2.46389	0.0237679	0.804983	10.1638	8.86285	10.1413	10.0946	10.2554	9.74418	9.06697	7.7774
ENSMUSG00000027496	Aurka	aurora kinase A	ProteinCoding	2.06483	4.18384	0.0407463	0.96655	2.71055	0.645722	6.46308	0	1.66856	0	0.915561	1.0216
ENSMUSG00000037727	Avp	arginine vasopressin	ProteinCoding	3.88047	14.7278	0.00201493	0.225926	3.88047	0	2.70497	2.2905	6.64593	0	0	0
ENSMUSG00000026432	Avpr1b	arginine vasopressin receptor 1B	ProteinCoding	3.46281	11.0258	0.00022572	0.0457115	3.46281	0	2.43732	3.66412	4.28698	0	0	0
ENSMUSG00000040466	Blvrb	biliverdin reductase B (flavin reductase (NADPH))	ProteinCoding	1.60918	3.05078	0.0186876	0.730538	3.13584	1.52666	2.10845	1.20002	6.09905	1.49504	1.47124	1.6137
ENSMUSG00000024164	C3	complement component 3	ProteinCoding	1.81047	3.50755	0.00010836	0.0268797	8.31779	6.50732	8.24039	9.0508	7.66217	6.274	6.15011	7.09785
ENSMUSG00000051331	Cacna1c	calcium channel, voltage-dependent, L type, alpha 1C subunit	ProteinCoding	2.69317	6.46733	0.0402573	0.965342	9.06661	6.37344	9.00054	9.11297	9.08631	5.62047	4.87586	8.62398
ENSMUSG00000040118	Cacna2d1	calcium channel, voltage-dependent, alpha2/delta subunit 1	ProteinCoding	0.963333	1.94981	0.0348971	0.92529	7.33401	6.37067	6.55065	6.78114	8.67023	6.30751	6.25429	6.55022
ENSMUSG00000029761	Cald1	caldesmon 1	ProteinCoding	0.909182	1.87798	0.0441896	0.994157	3.28329	2.37411	1.68175	1.20002	6.96811	2.21332	1.87141	3.0376
ENSMUSG00000057897	Camk2b	calcium/calmodulin-dependent protein kinase II, beta	ProteinCoding	1.41303	2.66295	0.031422	0.888579	7.64688	6.23386	7.38036	6.17708	9.3832	6.07431	7.22785	5.39941
ENSMUSG00000021373	Cap2	CAP, adenylate cyclase-associated protein, 2 (yeast)	ProteinCoding	0.990189	1.98644	0.00355569	0.318266	14.3923	13.4021	14.6911	13.4861	14.9996	13.3858	13.0762	13.7443
ENSMUSG00000031628	Casp3	caspase 3	ProteinCoding	2.45919	5.49908	0.00047276	0.0794797	7.03575	4.57657	4.66049	8.01061	8.43616	5.18844	3.74505	4.79621
ENSMUSG00000034165	Ccnd3	cyclin D3	ProteinCoding	3.73759	13.3391	5.74e-06	0.0022107	8.72495	4.98737	10.0223	9.9221	6.23046	4.6754	6.07623	4.21047
ENSMUSG00000029385	Ccng2	cyclin G2	ProteinCoding	2.16462	4.48349	0.0108943	0.583502	9.59937	7.43475	10.5014	8.84232	9.45438	6.82985	6.47158	9.00281
ENSMUSG00000029068	Ccnl2	cyclin L2	ProteinCoding	1.49603	2.82065	0.0243955	0.814581	9.64574	8.14971	10.4177	10.7029	7.81657	8.97692	6.88254	8.58967
ENSMUSG00000049103	Ccr2	chemokine (C-C motif) receptor 2	ProteinCoding	1.81609	3.52125	0.0022564	0.241399	4.6026	2.78652	4.52868	4.15918	5.11994	2.21332	3.30203	2.8442
ENSMUSG00000023274	Cd4	CD4 antigen	ProteinCoding	2.78549	6.89473	0.0408345	0.967071	8.18846	5.40297	5.97336	5.68928	12.9027	5.22397	5.18793	5.79699
ENSMUSG00000020307	Cdc34	cell division cycle 34	ProteinCoding	0.963503	1.95004	0.0261347	0.832911	8.91648	7.95298	9.23007	7.5332	9.98616	8.04332	7.86	7.9556
ENSMUSG00000017499	Cdc6	cell division cycle 6	ProteinCoding	1.78185	3.43867	0.0413429	0.972861	3.81257	2.03072	0	5.27147	6.16625	3.19916	1.87141	1.0216
ENSMUSG00000026365	Cfh	complement component factor h	ProteinCoding	2.31322	4.9699	0.00037563	0.0682515	8.1828	5.86958	8.12531	8.2446	8.17849	6.15016	4.53341	6.92517
ENSMUSG00000021919	Chat	choline acetyltransferase	ProteinCoding	1.9917	3.97706	0.0349968	0.92577	7.31853	5.32683	5.34863	5.27147	11.3355	5.59355	4.91877	5.46817
ENSMUSG00000024843	Chka	choline kinase alpha	ProteinCoding	3.80618	13.9886	0.0235109	0.803673	7.51918	3.713	6.58423	8.10201	7.87129	0	5.2895	5.84949
ENSMUSG00000025199	Chuk	conserved helix-loop-helix ubiquitous kinase	ProteinCoding	1.26481	2.40296	0.0180088	0.720687	9.01477	7.74996	10.3667	8.04645	8.63112	7.05373	7.92458	8.27157
ENSMUSG00000022512	Cldn1	claudin 1	ProteinCoding	1.31126	2.48159	0.00038001	0.0689248	8.60568	7.29441	9.11413	7.88954	8.81336	7.26465	7.4992	7.11939
ENSMUSG00000047230	Cldn2	claudin 2	ProteinCoding	3.63611	12.433	5.93e-06	0.00227164	6.95657	3.32046	9.11413	5.06331	6.69226	2.69067	3.64639	3.62433
ENSMUSG00000029238	Clock	circadian locomotor output cycles kaput	ProteinCoding	1.1578	2.23117	0.0407522	0.96655	11.1855	10.0277	9.56472	12.6834	11.3085	10.0217	9.12079	10.9407
ENSMUSG00000063889	Crem	cAMP responsive element modulator	ProteinCoding	2.12839	4.37228	0.00466716	0.371052	4.70603	2.57765	5.75479	4.15918	4.20413	3.45981	2.65943	1.6137
ENSMUSG00000003476	Crhr2	corticotropin releasing hormone receptor 2	ProteinCoding	1.55786	2.94417	0.00033875	0.0631384	6.56231	5.00445	6.64915	5.82754	7.21024	5.18844	4.73892	5.086
ENSMUSG00000017776	Crk	v-crk avian sarcoma virus CT10 oncogene homolog	ProteinCoding	1.08855	2.12661	0.00065994	0.101502	12.5174	11.4288	12.9309	12.9283	11.693	11.4342	11.2854	11.5669
ENSMUSG00000034675	Dbn1	drebrin 1	ProteinCoding	1.27433	2.41887	0.0240979	0.809507	9.41174	8.13741	8.67387	11.4158	8.14556	7.24748	8.37711	8.78763
ENSMUSG00000025408	Ddit3	DNA-damage inducible transcript 3	ProteinCoding	2.02092	4.05842	0.0492876	0.999941	5.00714	2.98622	4.2223	5.72511	5.07402	4.19202	3.74505	1.0216
ENSMUSG00000029433	Diablo	diablo, IAP-binding mitochondrial protein	ProteinCoding	2.04085	4.11487	0.0218552	0.784537	3.60513	1.56428	2.43732	1.20002	7.17804	0.933087	0.915561	2.8442
ENSMUSG00000032285	Dnaja4	DnaJ heat shock protein family (Hsp40) member A4	ProteinCoding	1.08193	2.11687	0.0141636	0.652997	6.56069	5.47876	6.31089	6.52073	6.85045	4.82175	5.9578	5.65674
ENSMUSG00000022789	Dnm1l	dynamin 1-like	ProteinCoding	1.07738	2.11019	0.00779741	0.494766	13.018	11.9407	12.9244	13.4422	12.6875	12.6195	11.2252	11.9773
ENSMUSG00000027478	Dnmt3b	DNA methyltransferase 3B	ProteinCoding	3.6678	12.7092	4.34e-05	0.0127034	3.6678	0	3.45112	4.44352	3.10876	0	0	0
ENSMUSG00000021478	Drd1	dopamine receptor D1	ProteinCoding	3.29604	9.82218	0.0030612	0.289002	6.31499	3.01895	4.66049	5.00621	9.27826	0.933087	4.08351	4.04025
ENSMUSG00000039358	Drd5	dopamine receptor D5	ProteinCoding	0.886987	1.84931	0.020992	0.769508	7.9996	7.11261	7.32183	8.01061	8.66637	6.8066	7.17573	7.35551
ENSMUSG00000057531	Dtnbp1	dystrobrevin binding protein 1	ProteinCoding	2.99683	7.98245	0.0257855	0.830214	5.03407	2.03724	6.49875	4.68094	3.92252	0.933087	4.15702	1.0216
ENSMUSG00000027203	Dut	deoxyuridine triphosphatase	ProteinCoding	1.36306	2.5723	0.00162838	0.195034	7.74965	6.38659	8.2972	7.47126	7.48048	5.81943	6.87167	6.46866
ENSMUSG00000028108	Ecm1	extracellular matrix protein 1	ProteinCoding	1.55026	2.92869	0.00582962	0.420643	8.48704	6.93679	8.47335	8.5791	8.40867	7.50026	5.75964	7.55045
ENSMUSG00000030208	Emp1	epithelial membrane protein 1	ProteinCoding	1.17812	2.26282	0.00373884	0.327663	8.50125	7.32313	8.56031	8.40229	8.54116	7.99786	7.12167	6.84987
ENSMUSG00000022425	Enpp2	ectonucleotide pyrophosphatase/phosphodiesterase 2	ProteinCoding	1.231	2.3473	0.0147881	0.664566	14.3741	13.1431	15.3399	13.4568	14.3256	13.4241	13.8262	12.1789
ENSMUSG00000027624	Epb41l1	erythrocyte membrane protein band 4.1 like 1	ProteinCoding	2.05497	4.15534	0.016936	0.701807	4.32446	2.2695	1.68175	5.92318	5.36846	3.04873	0.915561	2.8442
ENSMUSG00000038776	Ephx1	epoxide hydrolase 1, microsomal	ProteinCoding	10.7334	1702.46	2.9e-67	3.66e-63	10.7334	0	10.5372	10.1907	11.4723	0	0	0
ENSMUSG00000054252	Fgfr3	fibroblast growth factor receptor 3	ProteinCoding	6.69937	103.923	3.78e-27	1.16e-23	8.713	2.01364	8.05518	8.34011	9.74372	2.21332	1.47124	2.35634
ENSMUSG00000024222	Fkbp5	FK506 binding protein 5	ProteinCoding	3.5593	11.7885	8.26e-05	0.0213326	3.5593	0	2.70497	4.05042	3.92252	0	0	0
ENSMUSG00000031328	Flna	filamin, alpha	ProteinCoding	1.44778	2.72788	0.0302168	0.877706	11.0196	9.57177	11.828	11.5856	9.64509	9.49246	8.5058	10.7171
ENSMUSG00000028088	Fmo5	flavin containing monooxygenase 5	ProteinCoding	1.11184	2.16121	0.032179	0.897042	6.91243	5.80059	6.31089	8.23841	6.18797	6.11274	6.03782	5.2512
ENSMUSG00000026193	Fn1	fibronectin 1	ProteinCoding	5.24283	37.8661	0.0268975	0.842785	6.57213	1.32929	1.0732	8.42425	10.2189	1.49504	1.47124	1.0216
ENSMUSG00000075415	Fnbp1	formin binding protein 1	ProteinCoding	4.3055	19.7736	0.0251773	0.82394	9.77509	5.46959	12.6605	6.89561	9.76916	6.77101	7.01696	2.62079
ENSMUSG00000039286	Fndc3b	fibronectin type III domain containing 3B	ProteinCoding	1.00936	2.01301	0.0442433	0.994157	6.69765	5.68829	4.83805	8.44588	6.809	5.48056	6.15011	5.4342
ENSMUSG00000030067	Foxp1	forkhead box P1	ProteinCoding	1.27173	2.41451	0.00862301	0.520214	11.35	10.0782	11.0437	11.0845	11.9217	10.8978	9.33985	9.99704
ENSMUSG00000029563	Foxp2	forkhead box P2	ProteinCoding	1.99885	3.99681	0.0382638	0.955804	7.62666	5.62781	6.6332	5.53636	10.7104	3.04873	7.36602	6.46866
ENSMUSG00000028034	Fubp1	far upstream element (FUSE) binding protein 1	ProteinCoding	1.60367	3.03916	0.00401339	0.342482	8.90601	7.30234	7.31184	11.744	7.66217	7.10227	7.28635	7.51839
ENSMUSG00000020150	Gamt	guanidinoacetate methyltransferase	ProteinCoding	2.09371	4.26844	0.00044886	0.0769962	7.43678	5.34307	7.07248	7.75737	7.48048	5.32561	4.35746	6.34614
ENSMUSG00000021360	Gcnt2	glucosaminyl (N-acetyl) transferase 2, I-branching enzyme	ProteinCoding	1.21378	2.31945	0.00614825	0.430322	8.91982	7.70604	8.03102	8.69202	10.0364	7.81769	7.70318	7.59725
ENSMUSG00000022144	Gdnf	glial cell line derived neurotrophic factor	ProteinCoding	1.84001	3.58012	0.0050709	0.391045	6.35907	4.51906	4.66049	4.75213	9.66459	5.18844	4.00604	4.3627
ENSMUSG00000006345	Ggt1	gamma-glutamyltransferase 1	ProteinCoding	2.37483	5.18674	0.0319469	0.894647	3.35744	0.982616	5.86821	0	4.20413	0	0.915561	2.03229
ENSMUSG00000031748	Gnao1	guanine nucleotide binding protein, alpha O	ProteinCoding	1.05833	2.08252	2.94e-05	0.00901282	15.4523	14.394	15.1228	15.2315	16.0027	14.3558	14.2197	14.6064
ENSMUSG00000027523	Gnas	GNAS (guanine nucleotide binding protein, alpha stimulating) complex locus	ProteinCoding	1.6303	3.09577	0.0280117	0.85675	12.6118	10.9815	11.4888	11.6151	14.7316	11.3357	10.5402	11.0687
ENSMUSG00000023439	Gnb3	guanine nucleotide binding protein (G protein), beta 3	ProteinCoding	2.68776	6.44311	0.0284548	0.858625	2.68776	0	4.04065	0	4.02262	0	0	0
ENSMUSG00000075706	Gpx4	glutathione peroxidase 4	ProteinCoding	3.07106	8.40392	0.00666567	0.45099	3.69487	0.623804	2.93065	2.90441	5.24955	0	1.87141	0
ENSMUSG00000020524	Gria1	glutamate receptor, ionotropic, AMPA1 (alpha 1)	ProteinCoding	5.88656	59.1606	0.0104454	0.57111	8.48855	2.60199	10.7621	3.13497	11.5686	2.47165	3.30203	2.03229
ENSMUSG00000020734	Grin2c	glutamate receptor, ionotropic, NMDA2C (epsilon 3)	ProteinCoding	0.966545	1.95415	0.023752	0.804983	12.2473	11.2808	12.0673	11.9549	12.7198	11.7329	11.6667	10.4427
ENSMUSG00000019828	Grm1	glutamate receptor, metabotropic 1	ProteinCoding	0.99125	1.98791	0.0258079	0.830214	11.8712	10.88	11.5189	11.2695	12.8252	11.4451	10.9449	10.2499
ENSMUSG00000007850	Hnrnph1	heterogeneous nuclear ribonucleoprotein H1	ProteinCoding	0.906023	1.87387	0.00369573	0.324965	8.8182	7.91218	8.49999	9.36368	8.59092	7.90786	7.76914	8.05953
ENSMUSG00000015165	Hnrnpl	heterogeneous nuclear ribonucleoprotein L	ProteinCoding	1.29938	2.46123	0.00805214	0.503056	6.81801	5.51863	6.55065	6.15098	7.75241	5.152	5.38439	6.0195
ENSMUSG00000007617	Homer1	homer scaffolding protein 1	ProteinCoding	0.864409	1.82059	0.0267142	0.839162	13.3095	12.445	12.8714	12.8764	14.1805	12.1236	12.1757	13.0358
ENSMUSG00000020644	Id2	inhibitor of DNA binding 2	ProteinCoding	5.51939	45.8673	0.00124103	0.161027	10.7958	5.27642	11.7974	7.82497	12.765	3.33536	6.56907	5.92482
ENSMUSG00000031551	Ido1	indoleamine 2,3-dioxygenase 1	ProteinCoding	2.62635	6.17461	0.0236605	0.804098	7.25814	4.63179	4.78126	6.69344	10.2997	6.13157	6.15011	1.6137
ENSMUSG00000026072	Il1r1	interleukin 1 receptor, type I	ProteinCoding	1.17554	2.25877	0.017863	0.71769	8.97581	7.80027	9.29996	10.1826	7.44484	8.16715	7.88726	7.3464
ENSMUSG00000026981	Il1rn	interleukin 1 receptor antagonist	ProteinCoding	3.00603	8.03351	0.00197913	0.222805	3.00603	0	2.70497	2.2905	4.02262	0	0	0
ENSMUSG00000041115	Iqsec2	IQ motif and Sec7 domain 2	ProteinCoding	3.0812	8.46316	0.00507318	0.391045	8.21206	5.13086	5.99849	7.54327	11.0944	6.88639	5.662	2.8442
ENSMUSG00000000555	Itga5	integrin alpha 5 (fibronectin receptor alpha)	ProteinCoding	2.05675	4.16049	0.00408277	0.346068	9.71568	7.65893	8.67387	8.49858	11.9746	7.95091	8.59117	6.4347
ENSMUSG00000037369	Kdm6a	lysine (K)-specific demethylase 6A	ProteinCoding	2.33285	5.03798	0.0334617	0.912819	6.92799	4.59514	6.38899	8.4405	5.95446	2.21332	5.52987	6.04223
ENSMUSG00000003308	Keap1	kelch-like ECH-associated protein 1	ProteinCoding	3.09678	8.5551	0.0007361	0.109352	4.9566	1.85982	3.71644	3.66412	7.48926	1.89843	2.65943	1.0216
ENSMUSG00000002028	Kmt2a	lysine (K)-specific methyltransferase 2A	ProteinCoding	0.900426	1.86662	0.00025913	0.0506463	13.0545	12.1541	12.8701	12.9995	13.2939	12.5234	11.7845	12.1543
ENSMUSG00000023043	Krt18	keratin 18	ProteinCoding	4.76166	27.127	0.00720885	0.472836	5.98849	1.22684	7.38036	4.15918	6.42593	3.68051	0	0
ENSMUSG00000002900	Lamb1	laminin B1	ProteinCoding	0.830823	1.7787	0.0155478	0.678839	11.7467	10.9159	11.4213	11.5535	12.2654	11.3341	10.9946	10.419
ENSMUSG00000016024	Lbp	lipopolysaccharide binding protein	ProteinCoding	1.43882	2.71099	0.0409758	0.968316	8.52548	7.08666	9.99758	7.57307	8.00579	8.06798	5.78305	7.40896
ENSMUSG00000022500	Litaf	LPS-induced TN factor	ProteinCoding	2.32999	5.02803	0.0175487	0.713849	3.60567	1.27567	2.70497	2.90441	5.20763	2.21332	0	1.6137
ENSMUSG00000033060	Lmo7	LIM domain only 7	ProteinCoding	0.869606	1.82716	0.0317014	0.892215	12.1219	11.2523	11.1631	11.5429	13.6596	10.9955	11.2236	11.5377
ENSMUSG00000034205	Loxl2	lysyl oxidase-like 2	ProteinCoding	0.922901	1.89592	0.0169175	0.701807	7.30351	6.3806	7.45488	7.51285	6.94278	5.81943	6.71008	6.6123
ENSMUSG00000020593	Lpin1	lipin 1	ProteinCoding	0.968796	1.95721	0.0242516	0.810802	6.77962	5.81083	3.58987	6.91125	9.83776	5.48056	6.23744	5.71449
ENSMUSG00000015568	Lpl	lipoprotein lipase	ProteinCoding	1.21376	2.31942	0.0106424	0.575677	11.6042	10.3905	10.8284	10.609	13.3753	10.7093	9.92539	10.5367
ENSMUSG00000042622	Maff	v-maf musculoaponeurotic fibrosarcoma oncogene family, protein F (avian)	ProteinCoding	1.06056	2.08574	0.00059705	0.0939739	7.22284	6.16228	7.25039	7.45001	6.96811	6.40362	5.85108	6.23214
ENSMUSG00000027254	Map1a	microtubule-associated protein 1 A	ProteinCoding	1.09578	2.13728	1.34e-05	0.00450598	17.0114	15.9156	16.81	16.7779	17.4463	15.7347	15.7338	16.2783
ENSMUSG00000015222	Map2	microtubule-associated protein 2	ProteinCoding	5.12187	34.8205	0.033537	0.912987	11.5834	6.46155	14.5752	14.3257	5.84933	6.22222	8.47738	4.68505
ENSMUSG00000063358	Mapk1	mitogen-activated protein kinase 1	ProteinCoding	0.958041	1.94267	0.0174371	0.710496	9.41506	8.45702	8.35672	9.60632	10.2822	8.60472	8.36165	8.40471
ENSMUSG00000063065	Mapk3	mitogen-activated protein kinase 3	ProteinCoding	1.44518	2.72297	0.00705751	0.466935	8.17481	6.72963	7.27117	7.10044	10.1528	6.86404	6.51417	6.81069
ENSMUSG00000020366	Mapk9	mitogen-activated protein kinase 9	ProteinCoding	0.894088	1.85843	0.00262361	0.261862	7.15901	6.26493	7.26082	7.33878	6.87744	6.22222	6.48591	6.08664
ENSMUSG00000027820	Mme	membrane metallo endopeptidase	ProteinCoding	2.01167	4.0325	0.0493235	0.999941	11.1549	9.14326	9.63051	9.99728	13.837	10.2095	9.91085	7.3094
ENSMUSG00000012187	Mogat1	monoacylglycerol O-acyltransferase 1	ProteinCoding	2.12726	4.36887	0.031541	0.889768	2.43829	0.311029	2.93065	2.2905	2.09372	0.933087	0	0
ENSMUSG00000025044	Msr1	macrophage scavenger receptor 1	ProteinCoding	0.899234	1.86508	0.0466042	0.999941	6.20936	5.31012	6.09486	6.71141	5.82181	4.8674	5.18793	5.87504
ENSMUSG00000040675	Mthfd1l	methylenetetrahydrofolate dehydrogenase (NADP+ dependent) 1-like	ProteinCoding	1.48286	2.79502	0.0337191	0.915195	3.14398	1.66112	3.58987	1.20002	4.64205	1.89843	1.47124	1.6137
ENSMUSG00000019982	Myb	myeloblastosis oncogene	ProteinCoding	1.25944	2.39403	0.0466411	0.999941	4.91279	3.65334	3.83279	4.44352	6.46204	3.95882	4.15702	2.8442
ENSMUSG00000020900	Myh10	myosin, heavy polypeptide 10, non-muscle	ProteinCoding	0.832175	1.78037	0.00714416	0.470729	12.8364	12.0043	12.5354	12.5468	13.4271	11.7022	11.914	12.3966
ENSMUSG00000053093	Myh7	myosin, heavy polypeptide 7, cardiac muscle, beta	ProteinCoding	0.873147	1.83165	0.0399836	0.965342	9.06709	8.19394	8.73869	8.19436	10.2682	8.1534	7.97627	8.45216
ENSMUSG00000020647	Ncoa1	nuclear receptor coactivator 1	ProteinCoding	3.04904	8.27661	0.00125488	0.161787	4.49699	1.44795	4.3052	4.15918	5.02659	1.49504	2.84882	0
ENSMUSG00000067786	Nnat	neuronatin	ProteinCoding	2.73253	6.64619	0.0171809	0.705877	4.85685	2.12432	7.86331	3.13497	3.57227	3.33536	0	3.0376
ENSMUSG00000029361	Nos1	nitric oxide synthase 1, neuronal	ProteinCoding	3.30449	9.87983	0.00655765	0.447125	7.94841	4.64392	7.6499	6.47937	9.71596	6.40362	1.87141	5.65674
ENSMUSG00000026826	Nr4a2	nuclear receptor subfamily 4, group A, member 2	ProteinCoding	1.06118	2.08664	0.0143751	0.65664	8.7276	7.66641	7.06059	7.26768	11.8545	7.78238	7.41929	7.79758
ENSMUSG00000028341	Nr4a3	nuclear receptor subfamily 4, group A, member 3	ProteinCoding	2.11269	4.32496	0.0469812	0.999941	4.18974	2.07705	7.14179	3.3337	2.09372	2.69067	3.54048	0
ENSMUSG00000032420	Nt5e	5 nucleotidase, ecto	ProteinCoding	1.17434	2.2569	0.0161666	0.689787	9.81964	8.6453	8.73122	8.73219	11.9955	8.31041	8.59117	9.03433
ENSMUSG00000021848	Otx2	orthodenticle homeobox 2	ProteinCoding	3.85119	14.432	0.00070175	0.106003	5.74104	1.88984	6.29069	3.3337	7.59872	3.04873	0	2.62079
ENSMUSG00000022186	Oxct1	3-oxoacid CoA transferase 1	ProteinCoding	1.81867	3.52755	0.0468589	0.999941	10.1631	8.34444	9.5856	10.1971	10.7067	7.5571	7.485	9.99121
ENSMUSG00000021111	Papola	poly (A) polymerase alpha	ProteinCoding	2.81716	7.04776	0.0321281	0.896395	2.81716	0	0	5.17114	3.28035	0	0	0
ENSMUSG00000027168	Pax6	paired box 6	ProteinCoding	2.94603	7.70625	8.83e-05	0.0224531	5.31949	2.37346	5.94778	3.3337	6.67698	1.89843	2.18435	3.0376
ENSMUSG00000030513	Pcsk6	proprotein convertase subtilisin/kexin type 6	ProteinCoding	1.57628	2.98199	0.00081995	0.11688	9.64995	8.07367	10.3264	10.3353	8.28815	8.09702	7.78662	8.33738
ENSMUSG00000044254	Pcsk9	proprotein convertase subtilisin/kexin type 9	ProteinCoding	1.33067	2.51519	0.0289165	0.863273	7.57584	6.24518	6.84199	6.17708	9.70846	5.29252	6.36702	7.07599
ENSMUSG00000028525	Pde4b	phosphodiesterase 4B, cAMP specific	ProteinCoding	0.863206	1.81908	0.0471576	0.999941	9.43292	8.56971	8.83252	8.80932	10.6569	8.82899	8.14386	8.73627
ENSMUSG00000019990	Pde7b	phosphodiesterase 7B	ProteinCoding	2.67738	6.39695	0.00468021	0.371215	3.2936	0.616216	2.70497	1.84593	5.3299	0.933087	0.915561	0
ENSMUSG00000027400	Pdyn	prodynorphin	ProteinCoding	0.982582	1.976	0.0196666	0.748831	11.922	10.9395	11.0616	10.8006	13.9039	10.9682	10.7238	11.1263
ENSMUSG00000045573	Penk	preproenkephalin	ProteinCoding	1.55687	2.94215	0.0445161	0.994396	13.3236	11.7667	11.3177	11.3874	17.2655	11.3438	12.0726	11.8837
ENSMUSG00000041957	Pkp2	plakophilin 2	ProteinCoding	0.922912	1.89594	0.0236874	0.804745	8.67738	7.75446	8.37602	8.14892	9.50718	8.03334	7.86549	7.36455
ENSMUSG00000046223	Plaur	plasminogen activator, urokinase receptor	ProteinCoding	1.72825	3.31326	0.0105659	0.573015	5.32371	3.59545	6.07136	4.05042	5.84933	3.87188	4.29369	2.62079
ENSMUSG00000027750	Postn	periostin, osteoblast specific factor	ProteinCoding	2.39238	5.25023	0.0450156	0.995389	6.34037	3.94799	6.11797	7.69551	5.20763	5.8875	3.92418	2.03229
ENSMUSG00000061718	Ppp1r1b	protein phosphatase 1, regulatory (inhibitor) subunit 1B	ProteinCoding	1.82599	3.54551	0.00704891	0.466935	4.51373	2.68774	3.45112	3.50835	6.58174	2.69067	3.01621	2.35634
ENSMUSG00000038943	Prc1	protein regulator of cytokinesis 1	ProteinCoding	3.35715	10.2472	0.0186002	0.728793	4.18104	0.823884	1.0732	5.7942	5.67572	2.47165	0	0
ENSMUSG00000029053	Prkcz	protein kinase C, zeta	ProteinCoding	0.892373	1.85623	0.0463175	0.999941	7.4424	6.55003	7.10755	6.58063	8.63903	6.25695	6.59575	6.79739
ENSMUSG00000068744	Psrc1	proline/serine-rich coiled-coil 1	ProteinCoding	2.04053	4.11396	0.00014913	0.0332525	7.78687	5.74634	8.45531	8.55442	6.35089	5.67284	6.13199	5.4342
ENSMUSG00000032492	Pth1r	parathyroid hormone 1 receptor	ProteinCoding	0.832762	1.78109	0.0261517	0.832911	4.73155	3.89879	2.93065	8.84232	2.42168	3.77936	4.41852	3.49847
ENSMUSG00000021069	Pygl	liver glycogen phosphorylase	ProteinCoding	1.20687	2.30836	0.0336866	0.914761	3.24522	2.03835	8.06711	0	1.66856	1.89843	2.18435	2.03229
ENSMUSG00000034353	Ramp1	receptor (calcitonin) activity modifying protein 1	ProteinCoding	2.11347	4.3273	0.0378163	0.955381	4.42884	2.31538	2.93065	5.53636	4.81953	1.49504	3.83739	1.6137
ENSMUSG00000017491	Rarb	retinoic acid receptor, beta	ProteinCoding	1.48479	2.79877	0.0388779	0.957223	10.0246	8.53977	8.3998	8.27513	13.3987	8.51073	8.31423	8.79434
ENSMUSG00000042129	Rassf4	Ras association (RalGDS/AF-6) domain family member 4	ProteinCoding	2.06213	4.17603	0.0172334	0.706402	3.4638	1.40166	2.10845	4.26032	4.02262	0.933087	0.915561	2.35634
ENSMUSG00000026970	Rbms1	RNA binding motif, single stranded interacting protein 1	ProteinCoding	1.12221	2.17681	0.0167765	0.701092	6.57424	5.45202	6.42651	6.61922	6.67698	6.18664	5.04032	5.12911
ENSMUSG00000031586	Rbpms	RNA binding protein gene with multiple splicing	ProteinCoding	2.25201	4.76345	3.73e-05	0.0112206	7.62354	5.37153	7.98147	8.51914	6.37002	4.91166	5.35345	5.84949
ENSMUSG00000012705	Retn	resistin	ProteinCoding	1.8342	3.56574	0.00142576	0.176401	5.17638	3.34218	4.94534	4.68094	5.90286	2.69067	3.83739	3.49847
ENSMUSG00000020580	Rock2	Rho-associated coiled-coil containing protein kinase 2	ProteinCoding	1.24071	2.36315	0.0180433	0.720959	5.74127	4.50056	6.38899	6.3245	4.51032	4.6754	4.78603	4.04025
ENSMUSG00000022952	Runx1	runt related transcription factor 1	ProteinCoding	3.33187	10.0692	0.0235331	0.803673	3.33187	0	0	3.66412	6.3315	0	0	0
ENSMUSG00000039153	Runx2	runt related transcription factor 2	ProteinCoding	2.10219	4.2936	0.040343	0.965342	2.10219	0	2.10845	3.13497	1.06315	0	0	0
ENSMUSG00000020088	Sar1a	secretion associated Ras related GTPase 1A	ProteinCoding	1.02321	2.03244	0.00219105	0.237929	12.5044	11.4812	12.8845	13.0097	11.619	11.5495	11.2569	11.6372
ENSMUSG00000023927	Satb1	special AT-rich sequence binding protein 1	ProteinCoding	2.61407	6.12229	0.0308275	0.88409	10.2849	7.67087	6.64915	13.5793	10.6264	6.79483	9.03564	7.18214
ENSMUSG00000057969	Sema3b	sema domain, immunoglobulin domain (Ig), short basic domain, secreted, (semaphorin) 3B	ProteinCoding	2.93828	7.66496	0.0146876	0.663476	5.22012	2.28185	8.24565	2.90441	4.51032	3.19916	3.64639	0
ENSMUSG00000037411	Serpine1	serine (or cysteine) peptidase inhibitor, clade E, member 1	ProteinCoding	0.999195	1.99888	0.0472675	0.999941	7.30404	6.30484	6.27019	6.91125	8.73068	6.20454	5.87307	6.83692
ENSMUSG00000054766	Set	SET nuclear oncogene	ProteinCoding	1.3419	2.53485	0.046553	0.999941	11.6335	10.2916	10.8301	9.94507	14.1253	10.6998	10.2977	9.87731
ENSMUSG00000034269	Setd5	SET domain containing 5	ProteinCoding	1.89003	3.70643	0.0235038	0.803673	9.84482	7.95479	8.03102	8.34587	13.1576	7.96147	7.84895	8.05395
ENSMUSG00000026819	Slc25a25	solute carrier family 25 (mitochondrial carrier, phosphate carrier), member 25	ProteinCoding	1.07253	2.10311	0.0222507	0.786665	9.78708	8.71455	9.15102	8.80932	11.4009	8.85189	8.34208	8.94969
ENSMUSG00000023942	Slc29a1	solute carrier family 29 (nucleoside transporters), member 1	ProteinCoding	5.5645	47.324	0.00040228	0.0718047	6.52125	0.956751	9.13977	9.36084	1.06315	0.933087	0.915561	1.0216
ENSMUSG00000030237	Slco1a4	solute carrier organic anion transporter family, member 1a4	ProteinCoding	1.07039	2.1	0.0014389	0.177811	7.29181	6.22142	7.47293	7.27978	7.12273	6.49373	5.73584	6.4347
ENSMUSG00000024534	Sncaip	synuclein, alpha interacting protein (synphilin)	ProteinCoding	6.04492	66.0243	1.93e-26	5.59e-23	7.00167	0.956751	6.81395	7.43927	6.75181	0.933087	0.915561	1.0216
ENSMUSG00000018593	Sparc	secreted acidic cysteine rich glycoprotein	ProteinCoding	1.60909	3.0506	0.0447079	0.99536	13.5477	11.9386	13.1023	13.0765	14.4642	12.2763	10.2533	13.2861
ENSMUSG00000021990	Spata13	spermatogenesis associated 13	ProteinCoding	1.71663	3.28667	0.00662783	0.449813	7.59172	5.87509	8.31231	4.05042	10.4124	5.81943	6.63488	5.17096
ENSMUSG00000029304	Spp1	secreted phosphoprotein 1	ProteinCoding	2.61724	6.13576	0.0331588	0.909723	7.98036	5.36312	8.30729	7.42844	8.20536	4.11839	4.47711	7.49386
ENSMUSG00000009394	Syn2	synapsin II	ProteinCoding	1.33603	2.52455	0.0306144	0.883104	4.11234	2.77632	3.12575	3.66412	5.54716	3.04873	2.65943	2.62079
ENSMUSG00000061762	Tac1	tachykinin 1	ProteinCoding	1.96394	3.90127	0.030148	0.8762	10.0122	8.04825	8.39507	7.99602	13.6455	8.05817	7.52025	8.56634
ENSMUSG00000024985	Tcf7l2	transcription factor 7 like 2, T cell specific, HMG box	ProteinCoding	6.05864	66.655	1.55e-21	3.21e-18	6.69145	0.63281	6.27019	6.92671	6.87744	1.89843	0	0
ENSMUSG00000032411	Tfdp2	transcription factor Dp 2	ProteinCoding	1.16267	2.23871	0.00959586	0.548993	11.1736	10.0109	11.7334	9.38063	12.4067	9.92375	9.92276	10.1862
ENSMUSG00000047407	Tgif1	TGFB-induced factor homeobox 1	ProteinCoding	1.05787	2.08185	0.0357328	0.93255	6.72228	5.66441	6.49875	6.83132	6.83677	4.77459	6.13199	6.08664
ENSMUSG00000028364	Tnc	tenascin C	ProteinCoding	1.07796	2.11105	0.0223594	0.787654	6.9626	5.88465	6.66494	7.04483	7.17804	5.50965	5.50192	6.64237
ENSMUSG00000032366	Tpm1	tropomyosin 1, alpha	ProteinCoding	2.29128	4.8949	0.00015918	0.0347201	8.52357	6.23229	7.46393	7.69551	10.4113	6.09365	6.35144	6.25177
ENSMUSG00000027940	Tpm3	tropomyosin 3, gamma	ProteinCoding	1.75652	3.37882	0.0198915	0.753608	6.85161	5.0951	9.67405	6.37047	4.51032	6.25695	5.52987	3.49847
ENSMUSG00000005892	Trh	thyrotropin releasing hormone	ProteinCoding	1.87907	3.67838	0.00644898	0.444001	6.7505	4.87143	5.59919	5.49545	9.15685	5.7722	4.15702	4.68505
ENSMUSG00000059552	Trp53	transformation related protein 53	ProteinCoding	2.02139	4.05975	0.00354931	0.318266	5.18581	3.16442	2.10845	6.09731	7.35168	3.33536	2.65943	3.49847
ENSMUSG00000061808	Ttr	transthyretin	ProteinCoding	6.85666	115.894	0.00911821	0.534507	13.7077	6.85105	17.2008	9.43031	14.492	7.47836	7.541	5.5338
ENSMUSG00000020513	Tubd1	tubulin, delta 1	ProteinCoding	1.00811	2.01128	0.0315329	0.889768	7.55644	6.54832	6.86949	6.6568	9.14301	6.67156	6.47158	6.50184
ENSMUSG00000021830	Txndc16	thioredoxin domain containing 16	ProteinCoding	1.32003	2.49671	0.018121	0.721667	12.5126	11.1926	12.2789	12.0577	13.2013	10.9026	12.2123	10.4628
ENSMUSG00000038393	Txnip	thioredoxin interacting protein	ProteinCoding	0.895552	1.86032	0.0216249	0.77984	10.2628	9.36721	9.61231	10.788	10.388	9.5961	8.79203	9.71349
ENSMUSG00000001403	Ube2c	ubiquitin-conjugating enzyme E2C	ProteinCoding	2.31354	4.971	0.0477181	0.999941	2.93734	0.623804	3.83279	2.2905	2.68873	0	1.87141	0
ENSMUSG00000078578	Ube2d3	ubiquitin-conjugating enzyme E2D 3	ProteinCoding	1.72533	3.30655	0.0255818	0.830091	3.00386	1.27853	5.49709	1.84593	1.66856	1.89843	0.915561	1.0216
ENSMUSG00000001228	Uhrf1	ubiquitin-like, containing PHD and RING finger domains, 1	ProteinCoding	1.19815	2.29445	0.02151	0.77984	6.77301	5.57486	6.27019	6.45824	7.59059	5.25866	6.25429	5.21164
ENSMUSG00000025860	Xiap	X-linked inhibitor of apoptosis	ProteinCoding	1.83509	3.56794	0.00449336	0.364082	12.7698	10.9347	12.972	12.2335	13.1038	10.3658	10.188	12.2502
ENSMUSG00000022708	Zbtb20	zinc finger and BTB domain containing 20	ProteinCoding	1.1268	2.18374	9.72e-07	0.00045102	14.9531	13.8263	14.7855	14.8699	15.2038	14.1386	13.8905	13.4498
down_Test_vs_Control
Annotation				DE Statistic				FPKM
Track_id	Gene_Name	Description	Gene_Type	log2FC	Fold_Change	p_value	q_value	Test_FPKM	Control_FPKM	A1	A2	A3	B1	B2	B3
ENSMUSG00000029802	Abcg2	ATP-binding cassette, sub-family G (WHITE), member 2	ProteinCoding	-0.801107	0.573909	0.0102399	0.566833	9.37112	10.1722	9.25113	9.33788	9.52436	10.4243	10.5221	9.57031
ENSMUSG00000020917	Acly	ATP citrate lyase	ProteinCoding	-5.35204	0.0244837	0.0077306	0.492907	4.38106	9.7331	4.2223	5.22218	3.69871	12.3498	4.47711	12.3724
ENSMUSG00000031278	Acsl4	acyl-CoA synthetase long-chain family member 4	ProteinCoding	-0.954559	0.515999	0.00994285	0.557739	12.194	13.1486	12.2543	12.3385	11.9894	13.8381	13.589	12.0187
ENSMUSG00000051149	Adnp	activity-dependent neuroprotective protein	ProteinCoding	-1.37962	0.38432	0.00075092	0.109652	11.7163	13.0959	12.0414	11.307	11.8005	14.0017	13.1039	12.1821
ENSMUSG00000001211	Agpat3	1-acylglycerol-3-phosphate O-acyltransferase 3	ProteinCoding	-3.04787	0.120921	0.00027639	0.053078	3.42813	6.47599	4.04065	3.13497	3.10876	2.88078	7.73953	8.80766
ENSMUSG00000028393	Alad	aminolevulinate, delta-, dehydratase	ProteinCoding	-3.97617	0.0635408	8.82e-06	0.00321013	2.81948	6.79565	3.12575	3.66412	1.66856	8.07286	4.22697	8.08712
ENSMUSG00000031543	Ank1	ankyrin 1, erythroid	ProteinCoding	-2.83123	0.140513	0.00355621	0.318266	9.13975	11.971	7.80039	11.0443	8.57452	12.1341	11.6967	12.0821
ENSMUSG00000069729	Arid1b	AT rich interactive domain 1B (SWI-like)	ProteinCoding	-2.24293	0.211257	0.00423154	0.351899	6.48367	8.7266	7.68128	4.94676	6.82295	8.63803	8.13479	9.40696
ENSMUSG00000015522	Arnt	aryl hydrocarbon receptor nuclear translocator	ProteinCoding	-1.67637	0.312869	0.0137105	0.641739	5.64336	7.31973	6.77084	4.68094	5.47831	7.17671	7.10319	7.6793
ENSMUSG00000030314	Atg7	autophagy related 7	ProteinCoding	-2.36117	0.194634	0.0315529	0.889768	0.61531	2.97648	0	1.84593	0	3.45981	2.84882	2.62079
ENSMUSG00000024121	Atp6v0c	ATPase, H+ transporting, lysosomal V0 subunit C	ProteinCoding	-0.830418	0.562366	0.0228856	0.795938	12.66	13.4904	12.6244	12.6668	12.6887	14.5738	12.4603	13.4371
ENSMUSG00000057789	Bak1	BCL2-antagonist/killer 1	ProteinCoding	-0.945065	0.519406	0.0312731	0.887317	8.38631	9.33138	7.93014	8.5394	8.68939	10.0834	9.56418	8.34654
ENSMUSG00000046598	Bdh1	3-hydroxybutyrate dehydrogenase, type 1	ProteinCoding	-5.14078	0.0283446	0.00106852	0.145157	1.16945	6.31023	0	3.50835	0	6.18664	5.00093	7.74313
ENSMUSG00000020423	Btg2	B cell translocation gene 2, anti-proliferative	ProteinCoding	-0.802981	0.573164	0.00018614	0.0392478	11.0391	11.8421	11.11	11.1617	10.8455	12.1091	11.8068	11.6104
ENSMUSG00000053819	Camk2d	calcium/calmodulin-dependent protein kinase II, delta	ProteinCoding	-3.12782	0.114402	7.31e-06	0.00274858	1.52923	4.65705	1.0732	1.84593	1.66856	4.6754	4.00604	5.2897
ENSMUSG00000000058	Cav2	caveolin 2	ProteinCoding	-1.20898	0.432575	0.0285607	0.85897	5.96089	7.16987	6.55065	6.1244	5.20763	6.55081	6.87167	8.08712
ENSMUSG00000031654	Cbln1	cerebellin 1 precursor protein	ProteinCoding	-1.16191	0.446921	0.0282426	0.85729	9.29161	10.4535	10.0299	8.32268	9.52222	10.2914	10.7903	10.2789
ENSMUSG00000036686	Cc2d1a	coiled-coil and C2 domain containing 1A	ProteinCoding	-0.920753	0.528233	0.00805487	0.503056	9.32646	10.2472	9.60209	9.55	8.82727	10.0179	10.0416	10.6822
ENSMUSG00000025510	Cd151	CD151 antigen	ProteinCoding	-1.30981	0.403375	0.00032333	0.0609364	7.85734	9.16715	7.88369	7.71346	7.97489	9.74265	9.25659	8.5022
ENSMUSG00000015396	Cd83	CD83 antigen	ProteinCoding	-1.13004	0.456901	0.0181306	0.721667	8.22003	9.35008	8.33715	8.62249	7.70046	10.3668	8.4557	9.22769
ENSMUSG00000030399	Ckm	creatine kinase, muscle	ProteinCoding	-1.02889	0.490087	0.0457498	0.999941	3.90912	4.93801	4.2223	3.93278	3.57227	4.19202	5.22259	5.39941
ENSMUSG00000049550	Clip1	CAP-GLY domain containing linker protein 1	ProteinCoding	-2.08356	0.235932	0.0222383	0.786665	8.85524	10.9388	7.11906	9.07876	10.3679	11.0172	10.6597	11.1396
ENSMUSG00000021680	Crhbp	corticotropin releasing hormone binding protein	ProteinCoding	-4.55218	0.0426242	4.87e-06	0.0019102	3.15602	7.70821	4.04065	3.3337	2.09372	9.12994	4.41852	9.57616
ENSMUSG00000032060	Cryab	crystallin, alpha B	ProteinCoding	-4.92304	0.0329622	1.94e-10	1.59e-07	0	4.92304	0	0	0	4.72585	4.83164	5.21164
ENSMUSG00000027797	Dclk1	doublecortin-like kinase 1	ProteinCoding	-0.811566	0.569763	0.0269056	0.842785	13.8434	14.655	13.7588	13.8521	13.9193	13.9435	15.9447	14.0767
ENSMUSG00000066026	Dhrs3	dehydrogenase/reductase (SDR family) member 3	ProteinCoding	-2.81038	0.142558	0.0414958	0.973723	0	2.81038	0	0	0	0	3.30203	5.12911
ENSMUSG00000025195	Dnmbp	dynamin binding protein	ProteinCoding	-1.01019	0.496482	0.00995521	0.557739	9.06566	10.0758	8.65424	8.86658	9.67616	10.3718	10.0987	9.75708
ENSMUSG00000026131	Dst	dystonin	ProteinCoding	-5.44082	0.0230223	0.00276997	0.270337	4.17241	9.61323	4.3052	3.50835	4.70367	11.9053	11.9387	4.99572
ENSMUSG00000042156	Dzip1	DAZ interacting protein 1	ProteinCoding	-1.17867	0.441757	0.0420076	0.977149	9.35222	10.5309	9.28472	10.4441	8.32782	10.486	12.8066	8.30014
ENSMUSG00000027490	E2f1	E2F transcription factor 1	ProteinCoding	-1.08079	0.472769	0.0471798	0.999941	7.32924	8.41004	7.23989	7.99602	6.75181	8.04829	7.40427	9.77755
ENSMUSG00000078812	Eif5a	eukaryotic translation initiation factor 5A	ProteinCoding	-2.27913	0.206021	0.0083589	0.512326	8.95658	11.2357	10.5795	8.20709	8.08318	10.5495	10.4913	12.6663
ENSMUSG00000045394	Epcam	epithelial cell adhesion molecule	ProteinCoding	-3.10393	0.116312	0.0430232	0.984499	1.04499	4.14891	0	3.13497	0	4.62312	4.78603	3.0376
ENSMUSG00000021709	Erbin	Erbb2 interacting protein	ProteinCoding	-2.20223	0.217302	0.0297132	0.8762	0.757737	2.95996	1.0732	1.20002	0	0.933087	0.915561	7.03124
ENSMUSG00000021750	Fam107a	family with sequence similarity 107, member A	ProteinCoding	-1.42547	0.372298	0.0415404	0.973865	10.6077	12.0331	10.3164	10.6492	10.8574	10.087	15.1015	10.9109
ENSMUSG00000030357	Fkbp4	FK506 binding protein 4	ProteinCoding	-1.4427	0.367878	6.17e-05	0.0168639	8.57705	10.0197	8.28192	8.3687	9.08052	9.66882	10.3977	9.99267
ENSMUSG00000040181	Fmo1	flavin containing monooxygenase 1	ProteinCoding	-1.12458	0.458637	0.0277038	0.852223	3.99167	5.11625	3.83279	4.44352	3.69871	4.77459	4.83164	5.74252
ENSMUSG00000000838	Fmr1	fragile X mental retardation syndrome 1	ProteinCoding	-2.84633	0.139049	0.0168684	0.701092	2.23575	5.08208	0	3.13497	3.57227	8.45948	3.42617	3.36059
ENSMUSG00000019843	Fyn	Fyn proto-oncogene	ProteinCoding	-1.11141	0.46284	0.0168332	0.701092	7.86956	8.98097	7.93666	8.08142	7.59059	7.59152	7.58827	11.7631
ENSMUSG00000010803	Gabra1	gamma-aminobutyric acid (GABA) A receptor, subunit alpha 1	ProteinCoding	-0.929426	0.525067	0.02036	0.760243	9.1062	10.0356	9.3275	9.53242	8.45868	9.62463	10.1714	10.3108
ENSMUSG00000033676	Gabrb3	gamma-aminobutyric acid (GABA) A receptor, subunit beta 3	ProteinCoding	-1.87504	0.27262	0.00705953	0.466935	4.00342	5.87846	4.45797	4.44352	3.10876	6.18664	7.6015	3.84722
ENSMUSG00000020530	Ggnbp2	gametogenetin binding protein 2	ProteinCoding	-1.60206	0.329405	0.00075633	0.110138	8.32653	9.9286	8.11386	8.01785	8.84789	10.4452	10.5002	8.84046
ENSMUSG00000055737	Ghr	growth hormone receptor	ProteinCoding	-1.85256	0.2769	0.0170232	0.702637	5.621	7.47356	4.45797	6.92671	5.47831	7.493	7.18455	7.74313
ENSMUSG00000025407	Gli1	GLI-Kruppel family member GLI1	ProteinCoding	-0.890268	0.539514	0.03086	0.884183	8.16386	9.05413	8.48229	8.4351	7.57419	8.57751	9.01848	9.56639
ENSMUSG00000056073	Grik2	glutamate receptor, ionotropic, kainate 2 (beta 2)	ProteinCoding	-2.13536	0.227611	0.0123938	0.614873	2.02534	4.16069	2.10845	2.90441	1.06315	1.89843	5.25643	5.32721
ENSMUSG00000034813	Grip1	glutamate receptor interacting protein 1	ProteinCoding	-3.24776	0.105275	8.09e-07	0.00038813	7.29911	10.5469	6.42651	6.84766	8.62317	10.3091	10.4222	10.9094
ENSMUSG00000049583	Grm5	glutamate receptor, metabotropic 5	ProteinCoding	-1.72746	0.301983	0.0452947	0.99717	6.03956	7.76702	5.89522	6.1244	6.09905	5.69833	5.52987	12.0729
ENSMUSG00000006611	Hfe	hemochromatosis	ProteinCoding	-2.80083	0.143505	0.0391719	0.960218	0	2.80083	0	0	0	4.19202	0	4.21047
ENSMUSG00000038412	Higd1a	HIG1 domain family, member 1A	ProteinCoding	-3.29959	0.10156	0.0235025	0.803673	1.03625	4.33585	0	0	3.10876	3.77936	5.18793	4.04025
ENSMUSG00000029328	Hnrnpdl	heterogeneous nuclear ribonucleoprotein D-like	ProteinCoding	-1.29117	0.408621	0.00019765	0.0410403	11.3572	12.6484	10.8258	11.3114	11.9346	12.627	12.3636	12.9547
ENSMUSG00000053004	Hrh1	histamine receptor H1	ProteinCoding	-0.989479	0.50366	0.0329677	0.90692	7.9563	8.94578	7.23989	8.01785	8.61116	9.04307	9.13678	8.65749
ENSMUSG00000016194	Hsd11b1	hydroxysteroid 11-beta dehydrogenase 1	ProteinCoding	-0.905596	0.533812	0.00576597	0.419777	9.15489	10.0605	9.08509	9.64891	8.73068	10.0267	10.1332	10.0216
ENSMUSG00000053560	Ier2	immediate early response 2	ProteinCoding	-0.927106	0.525912	0.00609847	0.428914	9.46254	10.3896	9.71632	9.79302	8.87827	10.539	10.2731	10.3569
ENSMUSG00000020053	Igf1	insulin-like growth factor 1	ProteinCoding	-2.63615	0.160857	0.0443212	0.994241	0	2.63615	0	0	0	4.26207	3.64639	0
ENSMUSG00000027776	Il12a	interleukin 12a	ProteinCoding	-3.36406	0.0971222	0.0115626	0.596574	2.98015	6.3442	4.78126	4.15918	0	6.29085	5.9578	6.78396
ENSMUSG00000032737	Inppl1	inositol polyphosphate phosphatase-like 1	ProteinCoding	-1.59716	0.330527	0.00073729	0.109352	9.45877	11.0559	8.64631	9.83666	9.89335	10.3367	11.6429	11.1882
ENSMUSG00000022587	Ly6e	lymphocyte antigen 6 complex, locus E	ProteinCoding	-2.64599	0.159764	6.42e-10	4.89e-07	6.82071	9.4667	7.20793	7.04483	6.20937	9.52843	8.87607	9.99559
ENSMUSG00000045095	Magi1	membrane associated guanylate kinase, WW and PDZ domain containing 1	ProteinCoding	-1.41946	0.373852	2.77e-06	0.00116244	8.84696	10.2664	8.59368	8.91392	9.0333	10.1507	9.91218	10.7364
ENSMUSG00000046709	Mapk10	mitogen-activated protein kinase 10	ProteinCoding	-3.70842	0.0764986	2.67e-05	0.00837828	3.74712	7.45554	4.66049	4.15918	2.42168	8.77909	4.87586	8.71167
ENSMUSG00000021936	Mapk8	mitogen-activated protein kinase 8	ProteinCoding	-3.20814	0.108206	0.0211697	0.7718	0	3.20814	0	0	0	5.03683	4.5876	0
ENSMUSG00000041607	Mbp	myelin basic protein	ProteinCoding	-2.36353	0.194315	0.00050319	0.0836502	4.18432	6.54785	3.83279	4.35483	4.36533	4.26207	8.36165	7.01983
ENSMUSG00000020184	Mdm2	transformed mouse 3T3 cell double minute 2	ProteinCoding	-1.18561	0.43964	0.023137	0.799032	7.45871	8.64431	8.15356	7.27978	6.94278	7.6901	7.00706	11.2358
ENSMUSG00000005583	Mef2c	myocyte enhancer factor 2C	ProteinCoding	-3.96523	0.0640247	0.0297847	0.8762	7.57604	11.5413	6.20691	7.01619	9.50502	14.2688	13.9551	6.39993
ENSMUSG00000022346	Myc	myelocytomatosis oncogene	ProteinCoding	-2.02546	0.245627	0.00128745	0.164519	3.73351	5.75897	3.71644	4.05042	3.43368	6.82985	6.50011	3.94696
ENSMUSG00000024589	Nedd4l	neural precursor cell expressed, developmentally down-regulated gene 4-like	ProteinCoding	-1.69273	0.309341	0.00430564	0.356013	8.27212	9.96485	7.72711	8.87856	8.21068	6.84134	11.8727	11.1805
ENSMUSG00000021365	Nedd9	neural precursor cell expressed, developmentally down-regulated gene 9	ProteinCoding	-1.1955	0.436636	0.0214468	0.77854	4.54135	5.73685	4.59609	4.05042	4.97754	6.32398	6.03782	4.84873
ENSMUSG00000004891	Nes	nestin	ProteinCoding	-1.28811	0.409487	0.00415006	0.348555	7.82327	9.11138	8.1081	8.3687	6.993	9.24684	9.01106	9.07623
ENSMUSG00000028565	Nfia	nuclear factor I/A	ProteinCoding	-2.38718	0.191155	0.021639	0.77984	3.46354	5.85072	3.12575	5.17114	2.09372	6.44938	4.83164	6.27114
ENSMUSG00000001911	Nfix	nuclear factor I/X	ProteinCoding	-1.53693	0.344617	0.00275059	0.269375	8.42919	9.96612	8.79357	9.04017	7.45383	9.6656	9.8019	10.4309
ENSMUSG00000028163	Nfkb1	nuclear factor of kappa light polypeptide gene enhancer in B cells 1, p105	ProteinCoding	-1.83712	0.279881	0.0208828	0.7693	2.36727	4.20439	2.70497	3.3337	1.06315	3.19916	8.39241	1.0216
ENSMUSG00000024431	Nr3c1	nuclear receptor subfamily 3, group C, member 1	ProteinCoding	-1.38841	0.381984	0.00962337	0.549301	7.27432	8.66273	7.68902	7.24318	6.89075	7.5983	6.94614	11.4438
ENSMUSG00000042834	Nrep	neuronal regeneration related protein	ProteinCoding	-0.846801	0.556016	0.0382025	0.955804	10.8578	11.7046	10.0705	11.156	11.347	11.5729	11.8319	11.7091
ENSMUSG00000062991	Nrg1	neuregulin 1	ProteinCoding	-1.3109	0.403071	0.0283913	0.858315	5.85757	7.16846	5.99849	6.5002	5.07402	8.01824	5.50192	7.98523
ENSMUSG00000024109	Nrxn1	neurexin I	ProteinCoding	-1.13854	0.454218	0.0244142	0.814704	7.53584	8.67439	7.14179	7.67733	7.7884	7.79424	7.7154	10.5135
ENSMUSG00000066392	Nrxn3	neurexin III	ProteinCoding	-1.90127	0.267707	0.044975	0.99536	5.73774	7.63901	6.02319	5.86013	5.3299	5.3896	5.50192	12.0255
ENSMUSG00000057406	Nsd2	nuclear receptor binding SET domain protein 2	ProteinCoding	-0.844	0.557097	0.0137818	0.642179	10.7627	11.6067	10.6256	10.9058	10.7566	11.7471	12.2577	10.8152
ENSMUSG00000059146	Ntrk3	neurotrophic tyrosine kinase, receptor, type 3	ProteinCoding	-1.60326	0.329132	0.00196611	0.221833	7.52285	9.12611	7.30178	7.47126	7.7955	7.52896	10.201	9.64832
ENSMUSG00000026833	Olfm1	olfactomedin 1	ProteinCoding	-0.83441	0.560812	0.0168124	0.701092	6.69617	7.53058	6.56754	7.05893	6.46204	7.82928	7.11246	7.65
ENSMUSG00000029470	P2rx4	purinergic receptor P2X, ligand-gated ion channel 4	ProteinCoding	-1.52456	0.347586	0.00286953	0.276587	4.9714	6.49596	5.18312	5.61485	4.11623	6.73451	6.20314	6.55022
ENSMUSG00000005615	Pcyt1a	phosphate cytidylyltransferase 1, choline, alpha isoform	ProteinCoding	-3.43408	0.0925206	0.021414	0.778186	2.36754	5.80162	0	4.68094	2.42168	5.18844	8.08857	4.12786
ENSMUSG00000053965	Pde5a	phosphodiesterase 5A, cGMP-specific	ProteinCoding	-1.04541	0.484508	0.034081	0.918634	8.34939	9.3948	9.05845	8.4405	7.54923	9.46858	9.10694	9.60889
ENSMUSG00000026773	Pfkfb3	6-phosphofructo-2-kinase/fructose-2,6-biphosphatase 3	ProteinCoding	-3.12542	0.114592	0.0260192	0.831988	0	3.12542	0	0	0	0	4.87586	4.5004
ENSMUSG00000003363	Pld3	phospholipase D family, member 3	ProteinCoding	-3.74217	0.0747297	0.00273707	0.269375	0.61531	4.35748	0	1.84593	0	6.274	1.47124	5.32721
ENSMUSG00000022565	Plec	plectin	ProteinCoding	-2.5612	0.169434	0.00949831	0.544445	6.86931	9.43051	7.01206	8.56928	5.02659	7.67734	9.20336	11.4108
ENSMUSG00000027952	Pmvk	phosphomevalonate kinase	ProteinCoding	-3.64401	0.0799913	2.41e-06	0.00103152	5.65324	9.29726	5.94778	5.892	5.11994	10.9277	10.7925	6.17157
ENSMUSG00000020612	Prkar1a	protein kinase, cAMP dependent regulatory, type I, alpha	ProteinCoding	-0.846583	0.5561	0.0387562	0.957223	14.108	14.9546	13.9505	14.667	13.7066	15.6461	13.6288	15.589
ENSMUSG00000015090	Ptgds	prostaglandin D2 synthase (brain)	ProteinCoding	-1.42289	0.372965	0.0397662	0.965342	9.80308	11.226	10.9984	8.84232	9.5685	11.0235	10.5411	12.1133
ENSMUSG00000001847	Rac1	RAS-related C3 botulinum substrate 1	ProteinCoding	-1.75624	0.296018	0.0099251	0.557739	2.56719	4.32344	2.10845	2.90441	2.68873	7.6901	2.65943	2.62079
ENSMUSG00000023015	Racgap1	Rac GTPase-activating protein 1	ProteinCoding	-3.98681	0.0630738	0.00074463	0.109652	3.43406	7.42087	1.0732	4.35483	4.87414	8.1898	4.63982	9.433
ENSMUSG00000062115	Rai1	retinoic acid induced 1	ProteinCoding	-1.93774	0.261024	0.00255607	0.258951	2.66039	4.59813	2.43732	2.62987	2.91398	5.62047	4.22697	3.94696
ENSMUSG00000035325	Sec31a	Sec31 homolog A (S. cerevisiae)	ProteinCoding	-1.78877	0.289418	0.0105126	0.572017	8.23582	10.0246	6.89648	9.02228	8.7887	8.45948	10.4287	11.1856
ENSMUSG00000019970	Sgk1	serum/glucocorticoid regulated kinase 1	ProteinCoding	-1.78211	0.290757	0.0274705	0.849178	2.46359	4.2457	3.45112	1.84593	2.09372	2.69067	4.96043	5.086
ENSMUSG00000049624	Slc17a5	solute carrier family 17 (anion/sugar transporter), member 5	ProteinCoding	-0.929973	0.524868	0.0403005	0.965342	10.5757	11.5057	11.3363	9.87504	10.5159	11.4418	11.448	11.6274
ENSMUSG00000067144	Slc22a7	solute carrier family 22 (organic anion transporter), member 7	ProteinCoding	-2.82436	0.141183	0.00272669	0.268705	1.67479	4.49915	2.93065	0	2.09372	5.22397	4.53341	3.74008
ENSMUSG00000027333	Smox	spermine oxidase	ProteinCoding	-7.20797	0.00676369	1.35e-27	4.26e-24	0	7.20797	0	0	0	6.82985	7.22785	7.56622
ENSMUSG00000038037	Socs1	suppressor of cytokine signaling 1	ProteinCoding	-1.29626	0.407179	0.018846	0.733876	4.29987	5.59613	3.58987	4.60606	4.70367	5.07625	5.38439	6.32775
ENSMUSG00000020027	Socs2	suppressor of cytokine signaling 2	ProteinCoding	-1.87974	0.271733	0.0489688	0.999941	5.89973	7.77947	3.94046	6.72916	7.02955	7.22135	8.30617	7.81088
ENSMUSG00000030852	Tacc2	transforming, acidic coiled-coil containing protein 2	ProteinCoding	-3.23127	0.106485	6.19e-05	0.0168727	4.22948	7.46075	4.2223	4.44352	4.02262	4.26207	8.10724	10.013
ENSMUSG00000041459	Tardbp	TAR DNA binding protein	ProteinCoding	-1.23271	0.425518	0.00261428	0.261447	9.47769	10.7104	9.26673	9.50176	9.66459	11.6743	10.0196	10.4373
ENSMUSG00000053477	Tcf4	transcription factor 4	ProteinCoding	-1.50001	0.353551	0.00577784	0.419783	9.14718	10.6472	9.78654	9.53746	8.11754	10.9264	11.0475	9.96766
ENSMUSG00000024667	Tmem216	transmembrane protein 216	ProteinCoding	-2.13756	0.227264	0.00627644	0.436384	5.17052	7.30808	4.66049	4.44352	6.40753	8.1898	8.44473	5.2897
ENSMUSG00000024793	Tnfrsf25	tumor necrosis factor receptor superfamily, member 25	ProteinCoding	-2.85553	0.138166	0.00291185	0.279866	0.712115	3.56764	1.0732	0	1.06315	5.22397	2.44135	3.0376
ENSMUSG00000006764	Tph2	tryptophan hydroxylase 2	ProteinCoding	-0.85922	0.55125	0.0395241	0.963901	5.64245	6.50167	5.53193	5.68928	5.70614	6.03484	7.27814	6.19204

## Sheet: Anxiety AMY
#p-value cut-off <0.05 #q-value cut-off <1.00 #Gene biotype: protein_coding #Condition pair: up_Test_vs_Control & down_Test_vs_Control Column A: Track_id, The database name in gene level. Column B: Gene_Name, The name of gene. Column C: Description of the gene Column D: Gene_Type, The biological type of gene. Column E: log2FC, if the comparison is test vs control, log2 of the fold change will be …
up_Test_vs_Control
Annotation				DE Statistic				FPKM
Track_id	Gene_Name	Description	Gene_Type	log2FC	Fold_Change	p_value	q_value	Test_FPKM	Control_FPKM	A1	A2	A3	B1	B2	B3
ENSMUSG00000029802	Abcg2	ATP-binding cassette, sub-family G (WHITE), member 2	ProteinCoding	1.37579	2.59511	0.00013428	0.0212581	9.92265	8.54685	9.95977	10.6725	9.13564	8.52691	8.43178	8.68187
ENSMUSG00000025085	Ablim1	actin-binding LIM protein 1	ProteinCoding	1.14116	2.20558	0.00206761	0.122255	7.26561	6.12444	7.44118	7.43058	6.92506	5.89089	5.75252	6.72993
ENSMUSG00000090150	Acad11	acyl-Coenzyme A dehydrogenase family, member 11	ProteinCoding	1.4397	2.71264	0.00357786	0.165038	11.251	9.81127	11.2247	11.348	11.1802	10.0005	10.6312	8.80216
ENSMUSG00000001348	Acp5	acid phosphatase 5, tartrate resistant	ProteinCoding	2.87335	7.32762	0.0377386	0.415682	3.33663	0.463281	4.40572	5.60416	0	1.38984	0	0
ENSMUSG00000052593	Adam17	a disintegrin and metallopeptidase domain 17	ProteinCoding	1.73986	3.34002	0.00182138	0.112744	9.27031	7.53046	11.4078	7.68252	8.72064	7.56208	7.32664	7.70266
ENSMUSG00000024256	Adcyap1	adenylate cyclase activating polypeptide 1	ProteinCoding	1.51837	2.86467	0.00699235	0.229568	8.03572	6.51735	9.21834	8.44444	6.44437	7.16595	5.87405	6.51204
ENSMUSG00000033717	Adra2a	adrenergic receptor, alpha 2a	ProteinCoding	0.9091	1.87787	0.00694452	0.228966	10.6252	9.71605	11.0033	11.1863	9.6858	9.73294	9.69045	9.72477
ENSMUSG00000036932	Aifm1	apoptosis-inducing factor, mitochondrion-associated 1	ProteinCoding	1.96181	3.89551	0.00092191	0.0753	9.24796	7.28615	9.38739	9.5563	8.80018	6.48087	8.41185	6.96573
ENSMUSG00000026817	Ak1	adenylate kinase 1	ProteinCoding	2.37767	5.19695	3.1e-05	0.00716833	10.3201	7.94243	9.2056	10.9164	10.8383	8.77655	7.00164	8.04909
ENSMUSG00000028393	Alad	aminolevulinate, delta-, dehydratase	ProteinCoding	0.84388	1.79487	0.0100622	0.268175	10.9662	10.1223	10.3725	11.5893	10.9366	10.3726	10.2229	9.77137
ENSMUSG00000025270	Alas2	aminolevulinic acid synthase 2, erythroid	ProteinCoding	1.23446	2.35293	0.0255936	0.367627	8.6211	7.38664	9.28559	9.07164	7.50606	6.88858	6.98374	8.2876
ENSMUSG00000031543	Ank1	ankyrin 1, erythroid	ProteinCoding	2.21901	4.65574	0.00086892	0.0727085	11.9917	9.77268	11.7934	10.8837	13.2979	10.9326	8.84247	9.54296
ENSMUSG00000058589	Anks1b	ankyrin repeat and sterile alpha motif domain containing 1B	ProteinCoding	1.16202	2.23771	0.00798577	0.242739	9.06368	7.90165	9.15917	9.75595	8.27591	7.3275	7.91334	8.46412
ENSMUSG00000036452	Arhgap26	Rho GTPase activating protein 26	ProteinCoding	1.35266	2.55382	0.00346058	0.162329	7.90338	6.55072	7.18352	8.92509	7.60151	6.75426	6.03908	6.85882
ENSMUSG00000026463	Atp2b4	ATPase, Ca++ transporting, plasma membrane 4	ProteinCoding	0.978668	1.97064	0.00838771	0.247549	14.0301	13.0514	14.6076	14.5105	12.9722	12.7433	12.9418	13.4691
ENSMUSG00000042605	Atxn2	ataxin 2	ProteinCoding	0.912851	1.88276	0.00883255	0.253387	11.7971	10.8843	11.0696	12.7474	11.5743	10.9469	10.8666	10.8393
ENSMUSG00000020897	Aurkb	aurora kinase B	ProteinCoding	2.62672	6.1762	0.0421985	0.429385	2.62672	0	4.35388	0	3.52627	0	0	0
ENSMUSG00000024959	Bad	BCL2-associated agonist of cell death	ProteinCoding	0.871848	1.83001	0.00504767	0.197159	9.50036	8.62851	9.89324	9.6495	8.95835	8.6971	8.90084	8.2876
ENSMUSG00000022641	Bbx	bobby sox HMG box containing	ProteinCoding	2.07804	4.22234	5.16e-34	2.04e-30	13.2496	11.1716	13.2481	13.4798	13.021	11.1565	11.3324	11.0259
ENSMUSG00000024164	C3	complement component 3	ProteinCoding	1.49161	2.81202	0.0315679	0.392949	9.36433	7.87272	9.51086	7.58825	10.9939	9.11268	7.17721	7.32828
ENSMUSG00000051331	Cacna1c	calcium channel, voltage-dependent, L type, alpha 1C subunit	ProteinCoding	8.57052	380.176	1.35e-64	1.73e-60	8.57052	0	8.36029	8.69417	8.65711	0	0	0
ENSMUSG00000024617	Camk2a	calcium/calmodulin-dependent protein kinase II alpha	ProteinCoding	1.47333	2.77661	0.018251	0.333634	13.0917	11.6184	13.4752	13.446	12.354	12.1236	12.48	10.2516
ENSMUSG00000057897	Camk2b	calcium/calmodulin-dependent protein kinase II, beta	ProteinCoding	2.08	4.22808	0.0498873	0.44998	7.62329	5.54329	5.2057	5.52495	12.1392	5.16353	5.61979	5.84654
ENSMUSG00000021647	Cartpt	CART prepropeptide	ProteinCoding	0.993418	1.9909	0.0263854	0.371543	7.60214	6.60872	7.15352	8.69417	6.95873	7.02048	6.27804	6.52764
ENSMUSG00000031628	Casp3	caspase 3	ProteinCoding	1.66081	3.16194	0.00687983	0.228063	5.66537	4.00456	4.91513	5.04661	7.03437	4.56603	4.1362	3.31145
ENSMUSG00000026029	Casp8	caspase 8	ProteinCoding	0.847129	1.79892	0.0143339	0.306734	8.03053	7.1834	8.21169	8.50073	7.37918	6.78639	7.34077	7.42305
ENSMUSG00000032532	Cck	cholecystokinin	ProteinCoding	1.00927	2.0129	0.0499643	0.450004	9.69671	8.68744	10.7859	10.3292	7.97502	9.18073	7.84065	9.04094
ENSMUSG00000030898	Cckbr	cholecystokinin B receptor	ProteinCoding	0.983682	1.97751	0.0124803	0.290557	10.9108	9.92707	11.5819	11.3736	9.7767	9.6393	9.83841	10.3035
ENSMUSG00000034165	Ccnd3	cyclin D3	ProteinCoding	6.64434	100.034	2.82e-14	3.32e-11	7.76379	1.11944	6.36688	9.20043	7.72405	0	1.36706	1.99127
ENSMUSG00000029385	Ccng2	cyclin G2	ProteinCoding	2.09757	4.27988	0.00059162	0.0581353	9.0252	6.92763	7.24883	11.1938	8.63298	6.65336	7.33372	6.79581
ENSMUSG00000000682	Cd52	CD52 antigen	ProteinCoding	0.848517	1.80065	0.0414262	0.428022	7.27831	6.42979	8.11769	6.38012	7.33712	6.78639	6.13946	6.36353
ENSMUSG00000024610	Cd74	CD74 antigen (invariant polypeptide of major histocompatibility complex, class II antigen-associated)	ProteinCoding	1.82099	3.53323	0.0053405	0.202167	10.7483	8.92734	11.8793	11.1305	9.23517	7.60474	9.59645	9.58083
ENSMUSG00000000303	Cdh1	cadherin 1	ProteinCoding	3.34632	10.1705	0.00037353	0.0429108	6.2734	2.92708	6.09423	8.97809	3.74789	3.7174	1.75239	3.31145
ENSMUSG00000037664	Cdkn1c	cyclin-dependent kinase inhibitor 1C (P57)	ProteinCoding	4.01571	16.1752	0.00508379	0.198015	5.65625	1.64054	6.12548	5.38243	5.46084	0	3.92742	0.994189
ENSMUSG00000026365	Cfh	complement component factor h	ProteinCoding	3.77454	13.6851	0.0258227	0.368698	8.8554	5.08086	10.6787	11.1943	4.69317	6.99321	4.2603	3.98909
ENSMUSG00000000308	Ckmt1	creatine kinase, mitochondrial 1, ubiquitous	ProteinCoding	1.28578	2.43814	0.00903039	0.255557	10.6976	9.41179	9.86343	12.7955	9.4338	9.60368	8.98869	9.64301
ENSMUSG00000029661	Col1a2	collagen, type I, alpha 2	ProteinCoding	0.842161	1.79273	0.0241168	0.362105	10.3442	9.50204	10.2334	11.2431	9.55616	9.3005	9.36551	9.84012
ENSMUSG00000048126	Col6a3	collagen, type VI, alpha 3	ProteinCoding	0.927161	1.90153	0.0331528	0.398841	4.63629	3.70913	5.146	4.50182	4.26106	3.62568	3.92742	3.57429
ENSMUSG00000074643	Cpne1	copine I	ProteinCoding	1.05565	2.07865	0.0179317	0.331512	9.512	8.45635	9.06962	8.41545	11.0509	8.41492	8.58205	8.37209
ENSMUSG00000063889	Crem	cAMP responsive element modulator	ProteinCoding	0.993154	1.99053	0.0318154	0.394089	5.02647	4.03331	4.68279	5.70343	4.69317	4.40982	4.00042	3.68969
ENSMUSG00000049796	Crh	corticotropin releasing hormone	ProteinCoding	1.25488	2.38648	0.00237913	0.132858	7.36758	6.1127	6.53922	8.08816	7.47537	6.31459	5.73123	6.29228
ENSMUSG00000007888	Crlf1	cytokine receptor-like factor 1	ProteinCoding	1.4204	2.6766	0.00114283	0.0861874	5.97224	4.55184	5.65443	6.65273	5.60957	4.35375	4.99092	4.31087
ENSMUSG00000032060	Cryab	crystallin, alpha B	ProteinCoding	3.12756	8.73957	0.0214322	0.349775	3.12756	0	4.72421	4.65848	0	0	0	0
ENSMUSG00000024621	Csf1r	colony stimulating factor 1 receptor	ProteinCoding	1.67047	3.18317	0.0492613	0.448252	7.52612	5.85566	5.08372	8.82393	8.67072	7.43274	5.1913	4.94293
ENSMUSG00000034855	Cxcl10	chemokine (C-X-C motif) ligand 10	ProteinCoding	1.7429	3.34707	0.0143485	0.306937	3.00972	1.26682	2.64062	2.9873	3.40124	0.85619	1.36706	1.57721
ENSMUSG00000015340	Cybb	cytochrome b-245, beta polypeptide	ProteinCoding	1.1634	2.23985	0.00067805	0.062893	7.8546	6.69119	8.25472	7.73625	7.57281	7.14958	6.3356	6.58839
ENSMUSG00000063415	Cyp26b1	cytochrome P450, family 26, subfamily b, polypeptide 1	ProteinCoding	0.977038	1.96842	0.0416335	0.428596	8.25021	7.27318	8.77669	7.40131	8.57264	7.9783	7.04542	6.79581
ENSMUSG00000044548	Dact1	dishevelled-binding antagonist of beta-catenin 1	ProteinCoding	0.800479	1.74168	0.0368071	0.411214	8.848	8.04752	9.02682	9.48833	8.02885	8.37322	8.1443	7.62504
ENSMUSG00000027797	Dclk1	doublecortin-like kinase 1	ProteinCoding	1.22359	2.33527	0.00128392	0.0919797	15.0668	13.8432	15.2451	15.9258	14.0294	13.6473	13.6879	14.1943
ENSMUSG00000039450	Dcxr	dicarbonyl L-xylulose reductase	ProteinCoding	1.01412	2.01967	0.0420216	0.429117	5.96217	4.94805	6.02963	6.36503	5.49184	5.50982	4.1362	5.19812
ENSMUSG00000058886	Deaf1	deformed epidermal autoregulatory factor 1 (Drosophila)	ProteinCoding	1.15376	2.22493	0.0122489	0.288245	9.98614	8.83238	10.0088	9.23402	10.7156	9.11689	8.06994	9.3103
ENSMUSG00000028630	Dyrk2	dual-specificity tyrosine-(Y)-phosphorylation regulated kinase 2	ProteinCoding	0.816645	1.7613	0.0214254	0.34972	12.4082	11.5916	12.9249	12.8442	11.4555	11.2381	11.5581	11.9785
ENSMUSG00000036893	Ehmt1	euchromatic histone methyltransferase 1	ProteinCoding	1.5975	3.02619	0.00901003	0.255335	5.01723	3.41973	3.42277	3.61602	8.01291	3.30929	3.15335	3.79654
ENSMUSG00000045983	Eif4g1	eukaryotic translation initiation factor 4, gamma 1	ProteinCoding	1.18651	2.27601	0.00010464	0.0177725	13.9294	12.7429	13.4555	14.5463	13.7863	12.7385	12.4177	13.0725
ENSMUSG00000078812	Eif5a	eukaryotic translation initiation factor 5A	ProteinCoding	1.35663	2.56086	0.00390746	0.173607	9.95424	8.59761	9.25413	9.289	11.3196	8.93301	8.42848	8.43133
ENSMUSG00000003808	Farsa	phenylalanyl-tRNA synthetase, alpha subunit	ProteinCoding	1.86185	3.63474	0.0256637	0.368016	3.98193	2.12007	2.45628	4.12586	5.36364	0.85619	2.70665	2.79738
ENSMUSG00000006369	Fbln1	fibulin 1	ProteinCoding	1.09491	2.13599	0.0185159	0.334624	8.10405	7.00915	7.75771	9.21733	7.33712	7.09932	7.41608	6.51204
ENSMUSG00000022788	Fgd4	FYVE, RhoGEF and PH domain containing 4	ProteinCoding	1.8994	3.73059	2.55e-06	0.00094615	8.14743	6.24803	7.98768	7.75373	8.70088	6.81781	5.89335	6.03293
ENSMUSG00000031565	Fgfr1	fibroblast growth factor receptor 1	ProteinCoding	1.83827	3.5758	0.00088253	0.0733347	9.30354	7.46527	9.55457	11.0978	7.25819	7.38458	7.57987	7.43137
ENSMUSG00000008136	Fhl2	four and a half LIM domains 2	ProteinCoding	0.99856	1.99801	0.0293293	0.384815	10.0999	9.10132	10.8557	10.6878	8.75618	8.5798	9.06512	9.65903
ENSMUSG00000024222	Fkbp5	FK506 binding protein 5	ProteinCoding	1.64598	3.12959	0.00600004	0.213878	4.24041	2.59444	4.84177	2.9873	4.89217	2.33664	2.8714	2.57526
ENSMUSG00000070880	Gad1	glutamate decarboxylase 1	ProteinCoding	2.98931	7.94095	0.0019912	0.119449	14.5354	11.5461	11.5581	16.1096	15.9384	12.2587	11.1599	11.2196
ENSMUSG00000027523	Gnas	GNAS (guanine nucleotide binding protein, alpha stimulating) complex locus	ProteinCoding	1.7303	3.31798	0.00039734	0.0443552	10.2182	8.48794	11.0726	10.6832	8.89888	8.14449	9.05016	8.26916
ENSMUSG00000059923	Grb2	growth factor receptor bound protein 2	ProteinCoding	1.52756	2.88299	0.00039205	0.0440042	13.0227	11.4951	12.3363	13.64	13.0918	11.2328	12.2412	11.0114
ENSMUSG00000033318	Gstt2	glutathione S-transferase, theta 2	ProteinCoding	0.870529	1.82833	0.00554133	0.205077	5.88355	5.01302	5.94457	5.86225	5.84384	4.87572	5.36722	4.79613
ENSMUSG00000046711	Hmga1	high mobility group AT-hook 1	ProteinCoding	1.15034	2.21966	6.13e-05	0.0120282	7.34322	6.19288	7.68091	7.37896	6.96978	6.05811	6.0563	6.46422
ENSMUSG00000007617	Homer1	homer scaffolding protein 1	ProteinCoding	0.959401	1.9445	0.00835082	0.247191	13.6236	12.6642	14.0983	14.0129	12.7594	12.4394	12.3761	13.1769
ENSMUSG00000046321	Hs3st2	heparan sulfate (glucosamine) 3-O-sulfotransferase 2	ProteinCoding	1.08518	2.12165	0.0313334	0.392291	10.9096	9.82445	11.9127	11.4794	9.33683	9.06546	9.92768	10.4802
ENSMUSG00000090877	Hspa1b	heat shock protein 1B	ProteinCoding	0.845072	1.79635	0.00175564	0.109889	10.0696	9.22457	10.2378	10.3107	9.66045	9.29679	8.87681	9.50012
ENSMUSG00000034997	Htr2a	5-hydroxytryptamine (serotonin) receptor 2A	ProteinCoding	0.838203	1.78782	0.00834974	0.247191	12.2341	11.3959	12.5174	12.4488	11.736	10.9433	11.3665	11.8779
ENSMUSG00000032269	Htr3a	5-hydroxytryptamine (serotonin) receptor 3A	ProteinCoding	0.804158	1.74613	0.0294928	0.385544	7.67481	6.87065	8.07831	8.16419	6.78192	6.86871	6.60505	7.13818
ENSMUSG00000037405	Icam1	intercellular adhesion molecule 1	ProteinCoding	0.851962	1.80495	4.5e-05	0.00957379	9.30912	8.45716	9.40501	9.4831	9.03926	8.27475	8.42185	8.67488
ENSMUSG00000048583	Igf2	insulin-like growth factor 2	ProteinCoding	1.09404	2.13471	0.0105167	0.272222	10.0321	8.93805	9.87266	11.2569	8.96665	8.69428	9.10911	9.01074
ENSMUSG00000017493	Igfbp4	insulin-like growth factor binding protein 4	ProteinCoding	0.83694	1.78626	0.0308042	0.390056	12.6512	11.8143	12.8568	12.7682	12.3287	11.3145	12.5392	11.5892
ENSMUSG00000024810	Il33	interleukin 33	ProteinCoding	2.86029	7.2616	0.0445235	0.436276	12.0089	9.14857	11.4423	11.9417	12.6426	8.57368	11.2912	7.58087
ENSMUSG00000030786	Itgam	integrin alpha M	ProteinCoding	1.1444	2.21054	0.0320243	0.395058	9.52423	8.37983	10.1138	11.4565	7.00243	8.05941	7.81558	9.2645
ENSMUSG00000022957	Itsn1	intersectin 1 (SH3 domain protein 1A)	ProteinCoding	1.99978	3.99939	0.0299098	0.386885	3.49755	1.49777	0.805704	2.63167	7.05527	0.85619	0.839735	2.79738
ENSMUSG00000043301	Kcnj6	potassium inwardly-rectifying channel, subfamily J, member 6	ProteinCoding	1.03949	2.0555	0.00997435	0.267796	11.2851	10.2456	11.8787	12.0337	9.94295	10.1271	10.0648	10.5449
ENSMUSG00000063142	Kcnma1	potassium large conductance calcium-activated channel, subfamily M, alpha member 1	ProteinCoding	7.93382	244.521	5.15e-46	3.52e-42	7.93382	0	7.73763	8.35948	7.70434	0	0	0
ENSMUSG00000003308	Keap1	kelch-like ECH-associated protein 1	ProteinCoding	0.961988	1.94799	0.00936792	0.260302	8.11297	7.15098	8.06628	8.90176	7.37086	6.99321	7.09626	7.36346
ENSMUSG00000037465	Klf10	Kruppel-like factor 10	ProteinCoding	0.812396	1.75613	0.0242601	0.362577	11.6623	10.8499	11.9641	12.2259	10.797	10.4347	10.85	11.2651
ENSMUSG00000005148	Klf5	Kruppel-like factor 5	ProteinCoding	0.837085	1.78644	0.00556991	0.205561	10.655	9.8179	10.901	10.9975	10.0665	9.85156	9.48321	10.1189
ENSMUSG00000063229	Ldha	lactate dehydrogenase A	ProteinCoding	4.16593	17.9502	0.0188255	0.336619	8.99599	4.83006	7.8588	6.28716	12.842	5.65608	4.2603	4.5738
ENSMUSG00000027985	Lef1	lymphoid enhancer binding factor 1	ProteinCoding	0.847011	1.79877	0.0217942	0.351687	8.03368	7.18667	8.07831	8.69417	7.32856	7.35632	7.38233	6.82135
ENSMUSG00000068220	Lgals1	lectin, galactose binding, soluble 1	ProteinCoding	0.835048	1.78392	0.00257482	0.138732	8.18932	7.35428	8.3831	8.37838	7.8065	7.6578	7.11282	7.29221
ENSMUSG00000045095	Magi1	membrane associated guanylate kinase, WW and PDZ domain containing 1	ProteinCoding	0.913697	1.88387	0.027383	0.376161	6.90165	5.98795	9.88413	5.15581	5.66501	5.70171	6.39096	5.8712
ENSMUSG00000020623	Map2k6	mitogen-activated protein kinase kinase 6	ProteinCoding	0.802506	1.74413	0.0401297	0.424816	10.9239	10.1214	10.9601	11.1182	10.6933	10.6494	10.3277	9.38712
ENSMUSG00000063358	Mapk1	mitogen-activated protein kinase 1	ProteinCoding	0.827778	1.77495	0.00504863	0.197159	9.6196	8.79182	9.45199	10.0073	9.39947	8.40115	9.16576	8.80856
ENSMUSG00000053436	Mapk14	mitogen-activated protein kinase 14	ProteinCoding	0.80785	1.7506	0.0146112	0.309149	11.9788	11.171	12.1114	12.4231	11.402	10.6355	11.4765	11.4009
ENSMUSG00000005583	Mef2c	myocyte enhancer factor 2C	ProteinCoding	2.09854	4.28276	0.0456505	0.439359	8.4187	6.32016	6.48	11.4475	7.32856	7.61073	5.1913	6.15844
ENSMUSG00000024947	Men1	multiple endocrine neoplasia 1	ProteinCoding	2.10494	4.3018	0.017266	0.326584	9.45737	7.35243	8.50692	11.9404	7.9248	6.84857	7.04542	8.16332
ENSMUSG00000030218	Mgp	matrix Gla protein	ProteinCoding	1.37875	2.60043	0.00312629	0.155045	9.3033	7.92456	9.04532	10.5149	8.34968	7.94548	7.54978	8.27841
ENSMUSG00000038244	Mical2	microtubule associated monooxygenase, calponin and LIM domain containing 2	ProteinCoding	0.869818	1.82743	0.0104916	0.272072	13.4938	12.624	13.9874	14.0385	12.4555	12.4643	12.5444	12.8633
ENSMUSG00000022346	Myc	myelocytomatosis oncogene	ProteinCoding	1.3058	2.4722	0.0162634	0.320038	5.61191	4.30611	4.80364	5.0083	7.0238	4.10476	4.06991	4.74367
ENSMUSG00000048612	Myof	myoferlin	ProteinCoding	2.19511	4.57925	0.0322429	0.395449	6.2022	4.00709	3.08406	9.94151	5.58102	3.80364	3.7693	4.44832
ENSMUSG00000026107	Nabp1	nucleic acid binding protein 1	ProteinCoding	1.85462	3.61657	0.0102392	0.269893	7.5123	5.65768	8.10207	8.19437	6.24047	6.86871	4.75813	5.34619
ENSMUSG00000021068	Nin	ninein	ProteinCoding	1.44088	2.71486	0.00016364	0.0245071	12.0404	10.5995	12.5226	11.8468	11.7517	11.0292	10.8998	9.86948
ENSMUSG00000024431	Nr3c1	nuclear receptor subfamily 3, group C, member 1	ProteinCoding	1.98899	3.96958	0.00856969	0.249637	5.11962	3.13064	3.61117	8.48337	3.26433	3.7174	3.68323	1.99127
ENSMUSG00000026826	Nr4a2	nuclear receptor subfamily 4, group A, member 2	ProteinCoding	2.26342	4.8013	0.00025936	0.03351	7.2283	4.96488	7.74771	6.88193	7.05527	3.62568	5.49903	5.76993
ENSMUSG00000028341	Nr4a3	nuclear receptor subfamily 4, group A, member 3	ProteinCoding	1.36092	2.56849	0.0344577	0.403828	4.13789	2.77696	3.77778	6.36503	2.27084	3.18626	3.15335	1.99127
ENSMUSG00000057406	Nsd2	nuclear receptor binding SET domain protein 2	ProteinCoding	2.48682	5.60541	0.023424	0.35938	4.23901	1.75219	3.99639	3.97508	4.74555	3.42264	0.839735	0.994189
ENSMUSG00000019890	Nts	neurotensin	ProteinCoding	0.882835	1.84399	0.0340536	0.401911	9.0199	8.13707	8.486	9.74289	8.83081	8.4387	7.5003	8.4722
ENSMUSG00000025905	Oprk1	opioid receptor, kappa 1	ProteinCoding	1.50564	2.83951	0.0156363	0.316735	7.88886	6.38321	8.15224	8.17721	7.33712	5.19578	6.61671	7.33715
ENSMUSG00000027584	Oprl1	opioid receptor-like 1	ProteinCoding	1.78731	3.4517	0.0313312	0.392291	8.74148	6.95417	11.5784	7.60118	7.04485	7.45289	7.23129	6.17834
ENSMUSG00000019916	P4ha1	procollagen-proline, 2-oxoglutarate 4-dioxygenase (proline 4-hydroxylase), alpha 1 polypeptide	ProteinCoding	1.66812	3.178	0.0431558	0.432452	10.5614	8.89333	9.64091	12.8907	9.15271	9.06109	8.03995	9.57896
ENSMUSG00000051323	Pcdh19	protocadherin 19	ProteinCoding	1.05807	2.08215	3.95e-05	0.00868714	11.2794	10.2214	11.4635	11.4768	10.8981	10.5708	10.0402	10.0531
ENSMUSG00000019990	Pde7b	phosphodiesterase 7B	ProteinCoding	1.2903	2.44579	0.0320403	0.395066	3.95674	2.66644	4.91513	1.84748	5.1076	2.90343	2.52063	2.57526
ENSMUSG00000020893	Per1	period circadian clock 1	ProteinCoding	1.70392	3.25785	0.00616645	0.216349	12.8101	11.1062	13.066	13.0015	12.3629	9.71357	12.1104	11.4947
ENSMUSG00000021196	Pfkp	phosphofructokinase, platelet	ProteinCoding	0.861611	1.81707	0.00024492	0.0323184	13.5867	12.7251	13.7442	13.6643	13.3517	12.4907	12.5366	13.1481
ENSMUSG00000022565	Plec	plectin	ProteinCoding	3.03342	8.18746	0.00515166	0.199258	9.2436	6.21018	5.26303	10.8817	11.586	6.00449	6.50824	6.1178
ENSMUSG00000016487	Ppfibp1	PTPRF interacting protein, binding protein 1 (liprin beta 1)	ProteinCoding	1.05099	2.07195	0.00256014	0.138062	9.90239	8.8514	10.2316	9.02202	10.4536	8.91375	8.71542	8.92502
ENSMUSG00000031157	Pqbp1	polyglutamine binding protein 1	ProteinCoding	1.04852	2.06841	0.00027766	0.0353841	10.8107	9.7622	10.2405	11.2244	10.9672	9.93989	9.48798	9.85873
ENSMUSG00000002997	Prkar2b	protein kinase, cAMP dependent regulatory, type II beta	ProteinCoding	1.27549	2.42081	0.00668817	0.226071	10.6412	9.36567	10.2343	9.70146	11.9878	8.9893	9.28012	9.82757
ENSMUSG00000019969	Psen1	presenilin 1	ProteinCoding	1.2949	2.4536	0.0209477	0.347269	10.9684	9.67351	11.1029	11.2118	10.5905	9.73705	8.64317	10.6403
ENSMUSG00000068744	Psrc1	proline/serine-rich coiled-coil 1	ProteinCoding	1.44424	2.72119	0.00295807	0.150304	6.18551	4.74127	6.53922	7.12513	4.89217	4.87572	4.7154	4.63268
ENSMUSG00000027540	Ptpn1	protein tyrosine phosphatase, non-receptor type 1	ProteinCoding	0.878244	1.83814	0.00036929	0.042615	9.57623	8.69799	9.49	9.82095	9.41775	9.03458	8.44165	8.61774
ENSMUSG00000025314	Ptprj	protein tyrosine phosphatase, receptor type, J	ProteinCoding	0.832345	1.78058	0.0477643	0.44464	12.979	12.1467	13.6817	13.8307	11.4247	11.6075	12.6323	12.2002
ENSMUSG00000056553	Ptprn2	protein tyrosine phosphatase, receptor type, N polypeptide 2	ProteinCoding	0.912609	1.88245	0.00028431	0.0360533	10.4081	9.49545	10.8089	10.1767	10.2385	9.42816	9.29833	9.75986
ENSMUSG00000020415	Pttg1	pituitary tumor-transforming gene 1	ProteinCoding	2.20545	4.61217	0.00209755	0.123126	4.78388	2.57843	6.01301	1.84748	6.49114	2.55127	2.8714	2.31262
ENSMUSG00000062115	Rai1	retinoic acid induced 1	ProteinCoding	1.82951	3.55416	0.0163107	0.320091	4.98037	3.15086	4.72421	5.81863	4.39827	2.33664	4.31856	2.79738
ENSMUSG00000026014	Raph1	Ras association (RalGDS/AF-6) and pleckstrin homology domains 1	ProteinCoding	0.859936	1.81496	0.0272127	0.375258	9.60729	8.74735	10.5643	9.71788	8.53965	8.79509	8.53675	8.91022
ENSMUSG00000024990	Rbp4	retinol binding protein 4, plasma	ProteinCoding	5.19193	36.5532	0.0491172	0.448016	6.93061	1.73868	9.72619	8.31308	2.75255	2.90343	0	2.31262
ENSMUSG00000041670	Rims1	regulating synaptic membrane exocytosis 1	ProteinCoding	0.821661	1.76744	0.00557444	0.205561	12.4606	11.6389	12.8545	12.6621	11.8651	11.3844	11.5085	12.0238
ENSMUSG00000031309	Rps6ka3	ribosomal protein S6 kinase polypeptide 3	ProteinCoding	3.077	8.43858	0.0140835	0.304682	5.59806	2.52106	5.71732	5.52495	5.5519	4.40982	3.15335	0
ENSMUSG00000050711	Scg2	secretogranin II	ProteinCoding	0.939383	1.91771	0.00271732	0.14243	13.5645	12.6251	12.9274	13.4695	14.2965	12.8114	12.5221	12.5417
ENSMUSG00000025161	Slc16a3	solute carrier family 16 (monocarboxylic acid transporters), member 3	ProteinCoding	4.0177	16.1975	0.00341167	0.161846	7.33876	3.32105	7.9269	7.0135	7.07587	5.16353	4.79963	0
ENSMUSG00000024650	Slc22a6	solute carrier family 22 (organic anion transporter), member 6	ProteinCoding	1.81909	3.52859	0.00155963	0.10263	7.97148	6.15239	7.33156	10.017	6.56587	6.12663	5.94973	6.38081
ENSMUSG00000053113	Socs3	suppressor of cytokine signaling 3	ProteinCoding	0.936513	1.9139	2.48e-06	0.00092567	8.26567	7.32916	8.34378	8.41911	8.03413	7.20609	7.46204	7.31934
ENSMUSG00000018593	Sparc	secreted acidic cysteine rich glycoprotein	ProteinCoding	1.78301	3.44144	0.00010703	0.0180893	14.0214	12.2384	14.3289	14.9815	12.7538	12.6054	12.4561	11.6537
ENSMUSG00000057738	Sptan1	spectrin alpha, non-erythrocytic 1	ProteinCoding	0.803346	1.74514	0.00272712	0.142601	16.4554	15.6521	16.5146	16.9231	15.9285	15.843	15.741	15.3722
ENSMUSG00000041459	Tardbp	TAR DNA binding protein	ProteinCoding	4.32139	19.9925	0.0012895	0.092186	8.39483	4.07344	7.80191	8.26919	9.11339	3.05177	6.5933	2.57526
ENSMUSG00000034310	Tmem132d	transmembrane protein 132D	ProteinCoding	0.991739	1.98858	0.00352823	0.16372	12.5258	11.5341	12.8854	13.0081	11.6841	11.1364	11.6606	11.8053
ENSMUSG00000024401	Tnf	tumor necrosis factor	ProteinCoding	2.55756	5.8871	0.0117005	0.28324	4.1095	1.55194	4.87892	2.9873	4.46227	2.90343	1.75239	0
ENSMUSG00000027940	Tpm3	tropomyosin 3, gamma	ProteinCoding	1.10417	2.14975	9.1e-05	0.016011	9.02396	7.91979	9.19091	9.06232	8.81864	7.92639	7.5003	8.33269
ENSMUSG00000059552	Trp53	transformation related protein 53	ProteinCoding	1.42845	2.69157	1.09e-11	9.7e-09	9.01701	7.58856	8.82983	9.31081	8.9104	7.48587	7.72155	7.55827
ENSMUSG00000022010	Tsc22d1	TSC22 domain family, member 1	ProteinCoding	0.903973	1.87121	1.29e-06	0.00053274	13.6287	12.7247	13.6835	13.5443	13.6582	12.3691	12.8703	12.9347
ENSMUSG00000031431	Tsc22d3	TSC22 domain family, member 3	ProteinCoding	1.07254	2.10313	0.0216369	0.350654	9.154	8.08146	8.36357	10.8956	8.20285	8.33753	8.12403	7.78282
ENSMUSG00000030137	Tuba8	tubulin, alpha 8	ProteinCoding	0.998176	1.99747	0.0249171	0.364962	9.0934	8.09522	9.44427	9.76028	8.07564	7.64618	7.95066	8.68882
ENSMUSG00000001924	Uba1	ubiquitin-like modifier activating enzyme 1	ProteinCoding	1.66489	3.17088	0.0116135	0.282322	14.7852	13.1203	14.8942	14.9796	14.4818	14.4439	12.3433	12.5738
ENSMUSG00000001403	Ube2c	ubiquitin-conjugating enzyme E2C	ProteinCoding	2.90683	7.49971	0.00290006	0.148533	2.90683	0	4.35388	2.41446	1.95216	0	0	0
ENSMUSG00000025326	Ube3a	ubiquitin protein ligase E3A	ProteinCoding	1.91591	3.77352	0.0376653	0.415491	4.69006	2.77415	5.146	2.9873	5.93688	1.77853	2.30702	4.2369
ENSMUSG00000029512	Ulk1	unc-51 like kinase 1	ProteinCoding	3.18541	9.09712	0.013047	0.295858	9.95855	6.77314	9.24882	10.5311	10.0958	9.11479	5.96805	5.23659
ENSMUSG00000020407	Upp1	uridine phosphorylase 1	ProteinCoding	0.942855	1.92233	0.013037	0.295788	6.31435	5.3715	6.17112	6.49541	6.27651	5.50982	4.75813	5.84654
ENSMUSG00000037428	Vgf	VGF nerve growth factor inducible	ProteinCoding	1.12002	2.1735	0.0205444	0.34585	14.1826	13.0626	14.6007	14.4535	13.4937	13.5609	12.0462	13.5807
ENSMUSG00000026728	Vim	vimentin	ProteinCoding	0.940601	1.91933	0.00019717	0.0280153	11.2859	10.3453	10.946	11.2343	11.6773	10.6132	10.2531	10.1695
ENSMUSG00000039137	Whrn	whirlin	ProteinCoding	1.1871	2.27694	4.74e-06	0.00159438	9.09411	7.90701	9.01644	9.29099	8.9749	7.70338	8.315	7.70266
down_Test_vs_Control
Annotation				DE Statistic				FPKM
Track_id	Gene_Name	Description	Gene_Type	log2FC	Fold_Change	p_value	q_value	Test_FPKM	Control_FPKM	A1	A2	A3	B1	B2	B3
ENSMUSG00000040997	Abhd4	abhydrolase domain containing 4	ProteinCoding	-1.13041	0.456785	0.0121191	0.287391	8.18447	9.31488	8.04601	8.05565	8.45173	10.6952	8.42185	8.82758
ENSMUSG00000027605	Acss2	acyl-CoA synthetase short-chain family member 2	ProteinCoding	-0.821662	0.56579	0.0105858	0.272805	6.6126	7.43427	6.27232	6.56306	7.00243	7.64033	7.00164	7.66084
ENSMUSG00000029778	Adcyap1r1	adenylate cyclase activating polypeptide 1 receptor 1	ProteinCoding	-2.00385	0.249333	0.033518	0.399771	5.15898	7.16284	4.80364	5.0083	5.66501	10.8012	5.02631	5.66101
ENSMUSG00000024397	Aif1	allograft inflammatory factor 1	ProteinCoding	-1.62659	0.323852	0.00836437	0.247368	3.27044	4.89703	3.42277	2.9873	3.40124	2.55127	3.92742	8.2124
ENSMUSG00000074968	Ano3	anoctamin 3	ProteinCoding	-1.04269	0.485422	0.0277632	0.378373	6.88306	7.92575	6.29997	7.32542	7.0238	6.6417	8.2861	8.84947
ENSMUSG00000020609	Apob	apolipoprotein B	ProteinCoding	-1.93496	0.261529	0.0210161	0.347573	5.38678	7.32173	5.6757	3.80669	6.67793	8.99847	6.36354	6.60318
ENSMUSG00000019987	Arg1	arginase, liver	ProteinCoding	-1.0427	0.485417	0.031952	0.394832	4.10331	5.14602	3.77778	3.89334	4.63882	5.87105	4.67137	4.89563
ENSMUSG00000074794	Arrdc3	arrestin domain containing 3	ProteinCoding	-0.809972	0.570393	0.0291671	0.384586	6.73628	7.54625	6.70354	6.4815	7.0238	6.94659	8.31142	7.38074
ENSMUSG00000028207	Asph	aspartate-beta-hydroxylase	ProteinCoding	-1.1446	0.452315	0.0132823	0.298247	8.91774	10.0623	9.16106	9.38931	8.20285	10.7376	10.4443	9.00519
ENSMUSG00000027496	Aurka	aurora kinase A	ProteinCoding	-2.41661	0.187296	0.0326474	0.396955	0.322761	2.73937	0	0	0.968284	1.38984	0.839735	5.98854
ENSMUSG00000005087	Cd44	CD44 antigen	ProteinCoding	-1.36583	0.388012	0.0186038	0.335187	2.31006	3.67589	2.24488	2.41446	2.27084	7.66933	1.36706	1.99127
ENSMUSG00000023067	Cdkn1a	cyclin-dependent kinase inhibitor 1A (P21)	ProteinCoding	-0.912386	0.531306	0.0127321	0.293516	5.7736	6.68598	5.69666	5.49755	6.12658	6.05811	7.1534	6.84644
ENSMUSG00000031502	Col4a1	collagen, type IV, alpha 1	ProteinCoding	-0.983791	0.505649	9.67e-06	0.00285024	9.20512	10.1889	9.04123	9.52442	9.04972	10.1458	9.99063	10.4303
ENSMUSG00000061353	Cxcl12	chemokine (C-X-C motif) ligand 12	ProteinCoding	-2.13619	0.22748	0.0411703	0.427401	6.26637	8.40256	5.34497	6.99402	6.46013	6.15971	12.2913	6.75665
ENSMUSG00000003555	Cyp17a1	cytochrome P450, family 17, subfamily a, polypeptide 1	ProteinCoding	-2.20368	0.217083	0.0187636	0.336348	0	2.20368	0	0	0	2.08441	1.36706	3.15958
ENSMUSG00000030208	Emp1	epithelial membrane protein 1	ProteinCoding	-1.92136	0.264005	0.0364767	0.410307	0	1.92136	0	0	0	2.08441	1.36706	2.31262
ENSMUSG00000027249	F2	coagulation factor II	ProteinCoding	-1.39381	0.380557	0.0247257	0.363537	3.03191	4.42573	3.52004	2.63167	2.94403	6.05811	2.70665	4.51242
ENSMUSG00000070047	Fat1	FAT atypical cadherin 1	ProteinCoding	-2.11686	0.230548	0.00342047	0.161846	9.12875	11.2456	10.5856	8.43002	8.37067	11.0436	11.4641	11.2292
ENSMUSG00000028088	Fmo5	flavin containing monooxygenase 5	ProteinCoding	-1.58686	0.332895	0.00026369	0.0339783	5.55076	7.13762	5.94457	5.15581	5.5519	7.02945	6.4702	7.91322
ENSMUSG00000075415	Fnbp1	formin binding protein 1	ProteinCoding	-1.21159	0.431793	0.0121021	0.287329	5.27404	6.48563	4.84177	6.13543	4.84493	6.53229	6.44426	6.48034
ENSMUSG00000010803	Gabra1	gamma-aminobutyric acid (GABA) A receptor, subunit alpha 1	ProteinCoding	-2.38473	0.191481	3.43e-10	2.68e-07	8.97269	11.3574	8.37986	8.96565	9.57256	11.6645	11.5732	10.8346
ENSMUSG00000032562	Gnai2	guanine nucleotide binding protein (G protein), alpha inhibiting 2	ProteinCoding	-0.820744	0.56615	0.00810447	0.243962	10.8603	11.681	10.6879	11.0181	10.8747	10.8317	12.0972	12.1141
ENSMUSG00000025934	Gsta3	glutathione S-transferase, alpha 3	ProteinCoding	-3.27919	0.103007	8.31e-07	0.00036745	1.38014	4.65933	1.69777	0.900133	1.54252	4.79381	3.7693	5.41489
ENSMUSG00000060261	Gtf2i	general transcription factor II I	ProteinCoding	-1.61875	0.325618	0.0147016	0.309149	5.47204	7.09079	4.80364	5.04661	6.56587	7.8166	9.37926	4.0765
ENSMUSG00000029556	Hnf1a	HNF1 homeobox A	ProteinCoding	-1.07306	0.475311	0.0283124	0.381518	4.59871	5.67177	5.05154	3.80669	4.9379	5.50982	5.36722	6.13827
ENSMUSG00000036117	Il5	interleukin 5	ProteinCoding	-3.38106	0.0959838	5.6e-05	0.0111786	0	3.38106	0	0	0	3.7174	3.85053	2.57526
ENSMUSG00000038319	Kcnh2	potassium voltage-gated channel, subfamily H (eag-related), member 2	ProteinCoding	-1.83598	0.280101	0.0284934	0.382287	5.58198	7.41796	6.57361	6.42444	3.74789	7.60474	7.53142	7.11772
ENSMUSG00000029088	Kcnip4	Kv channel interacting protein 4	ProteinCoding	-1.68076	0.311919	0.00160552	0.104311	6.7647	8.44546	6.86962	6.90297	6.5215	10.0879	8.32924	6.91919
ENSMUSG00000022875	Kng1	kininogen 1	ProteinCoding	-2.84169	0.139498	0.0460203	0.440525	0	2.84169	0	0	0	5.53525	0	2.98982
ENSMUSG00000003123	Lipe	lipase, hormone sensitive	ProteinCoding	-2.44554	0.183577	0.0311573	0.391519	0.591329	3.03687	0.805704	0	0.968284	0.85619	0.839735	7.41469
ENSMUSG00000041020	Map7d2	MAP7 domain containing 2	ProteinCoding	-1.05512	0.481257	0.0354164	0.4065	4.12518	5.1803	4.06246	4.12586	4.18723	4.23462	6.67362	4.63268
ENSMUSG00000068037	Mas1	MAS1 oncogene	ProteinCoding	-2.70862	0.152976	0.0069928	0.229568	1.46784	4.17646	2.24488	2.15864	0	6.38622	3.15335	2.98982
ENSMUSG00000031337	Mtm1	X-linked myotubular myopathy gene 1	ProteinCoding	-1.21564	0.430581	0.0227495	0.356043	2.89264	4.10829	2.45628	2.82042	3.40124	3.88501	3.92742	4.51242
ENSMUSG00000015950	Ncf1	neutrophil cytosolic factor 1	ProteinCoding	-3.17383	0.11081	0.0339964	0.401833	4.24329	7.41712	6.7241	2.15864	3.84711	7.76916	6.67362	7.80859
ENSMUSG00000024589	Nedd4l	neural precursor cell expressed, developmentally down-regulated gene 4-like	ProteinCoding	-1.56567	0.337822	0.0378986	0.416003	7.74947	9.31514	7.88642	8.0079	7.35409	7.70898	12.4798	7.75659
ENSMUSG00000029361	Nos1	nitric oxide synthase 1, neuronal	ProteinCoding	-0.902335	0.53502	0.00862255	0.250319	5.33257	6.23491	5.17616	5.79631	5.02525	6.20794	6.50824	5.98854
ENSMUSG00000022809	Nr1i2	nuclear receptor subfamily 1, group I, member 2	ProteinCoding	-1.51196	0.350634	0.0168899	0.323991	2.78074	4.2927	3.08406	2.9873	2.27084	5.80985	3.49395	3.57429
ENSMUSG00000005677	Nr1i3	nuclear receptor subfamily 1, group I, member 3	ProteinCoding	-3.3735	0.0964884	0.0199832	0.342073	0	3.3735	0	0	0	5.74594	4.37456	0
ENSMUSG00000039196	Orm1	orosomucoid 1	ProteinCoding	-2.61416	0.163328	0.00256104	0.138062	0	2.61416	0	0	0	2.73807	2.30702	2.79738
ENSMUSG00000052613	Pcdh15	protocadherin 15	ProteinCoding	-2.05337	0.24092	0.013619	0.300448	1.41251	3.46589	0.805704	0.900133	2.53171	3.96204	3.27604	3.15958
ENSMUSG00000030701	Plekhb1	pleckstrin homology domain containing, family B (evectins) member 1	ProteinCoding	-0.921495	0.527962	0.0416865	0.428596	11.7573	12.6788	11.2323	11.6415	12.3981	12.7321	14.0913	11.213
ENSMUSG00000038583	Pln	phospholamban	ProteinCoding	-3.16127	0.11178	0.0202637	0.343823	0	3.16127	0	0	0	4.95323	4.53058	0
ENSMUSG00000017754	Pltp	phospholipid transfer protein	ProteinCoding	-0.925965	0.526328	0.0444294	0.436036	10.0677	10.9937	10.5471	10.3107	9.34534	10.8025	10.0206	12.158
ENSMUSG00000021948	Prkcd	protein kinase C, delta	ProteinCoding	-3.07605	0.118582	0.00688057	0.228063	0.891373	3.96742	0.805704	0.900133	0.968284	3.05177	0.839735	8.01077
ENSMUSG00000029086	Prom1	prominin 1	ProteinCoding	-1.84323	0.278698	2.04e-07	0.00010184	7.56715	9.41037	8.12544	7.40131	7.17469	9.7038	8.9729	9.55442
ENSMUSG00000006998	Psmd2	proteasome (prosome, macropain) 26S subunit, non-ATPase, 2	ProteinCoding	-1.14358	0.452634	0.00331583	0.159402	12.1945	13.3381	12.3968	12.1433	12.0434	11.9871	13.9172	14.1099
ENSMUSG00000064329	Scn1a	sodium channel, voltage-gated, type I, alpha	ProteinCoding	-2.1403	0.226833	1.63e-05	0.00442806	9.17102	11.3113	9.53725	9.17255	8.80327	12.1296	12.0881	9.71629
ENSMUSG00000023033	Scn8a	sodium channel, voltage-gated, type VIII, alpha	ProteinCoding	-1.16972	0.444506	0.00111157	0.0846579	5.72235	6.89208	5.83542	5.75062	5.58102	7.16595	6.15553	7.35475
ENSMUSG00000005089	Slc1a2	solute carrier family 1 (glial high affinity glutamate transporter), member 2	ProteinCoding	-1.926	0.263158	0.0186711	0.335737	4.25424	6.18024	3.31846	3.80669	5.63756	8.10258	5.12755	5.31057
ENSMUSG00000023942	Slc29a1	solute carrier family 29 (nucleoside transporters), member 1	ProteinCoding	-1.21778	0.429944	0.00716208	0.232073	8.92471	10.1425	9.78487	8.48337	8.50588	10.2826	9.92651	10.2184
ENSMUSG00000025006	Sorbs1	sorbin and SH3 domain containing 1	ProteinCoding	-1.39272	0.380847	0.00102038	0.0802473	7.39114	8.78386	7.61638	7.17787	7.37918	9.42646	9.30735	7.61777
ENSMUSG00000029304	Spp1	secreted phosphoprotein 1	ProteinCoding	-1.58251	0.333899	0.00302833	0.152364	5.68994	7.27245	5.29086	6.34979	5.42917	8.0462	5.91239	7.85877
ENSMUSG00000073988	Ttpa	tocopherol (alpha) transfer protein	ProteinCoding	-1.16031	0.447417	0.0205901	0.346221	6.64105	7.80136	6.57361	5.94572	7.40383	7.58051	8.45145	7.37213
ENSMUSG00000024924	Vldlr	very low density lipoprotein receptor	ProteinCoding	-0.976408	0.508244	0.0268652	0.373485	7.79539	8.7718	7.78732	7.94843	7.65041	10.3414	7.46204	8.51195
ENSMUSG00000025860	Xiap	X-linked inhibitor of apoptosis	ProteinCoding	-2.00439	0.249241	0.0020998	0.123126	8.30722	10.3116	8.05415	9.48833	7.37918	11.0867	9.29652	10.5516

## Sheet: Depression AMY
#p-value cut-off <0.05 #q-value cut-off <1.00 #Gene biotype: protein_coding #Condition pair: up_Test_vs_Control & down_Test_vs_Control Column A: Track_id, The database name in gene level. Column B: Gene_Name, The name of gene. Column C: Description of the gene Column D: Gene_Type, The biological type of gene. Column E: log2FC, if the comparison is test vs control, log2 of the fold change will be …
up_Test_vs_Control
Annotation				DE Statistic				FPKM
Track_id	Gene_Name	Description	Gene_Type	log2FC	Fold_Change	p_value	q_value	Test_FPKM	Control_FPKM	A1	A2	A3	B1	B2	B3
ENSMUSG00000029802	Abcg2	ATP-binding cassette, sub-family G (WHITE), member 2	ProteinCoding	1.37579	2.59511	0.00013428	0.0212581	9.92265	8.54685	9.95977	10.6725	9.13564	8.52691	8.43178	8.68187
ENSMUSG00000025085	Ablim1	actin-binding LIM protein 1	ProteinCoding	1.14116	2.20558	0.00206761	0.122255	7.26561	6.12444	7.44118	7.43058	6.92506	5.89089	5.75252	6.72993
ENSMUSG00000001348	Acp5	acid phosphatase 5, tartrate resistant	ProteinCoding	2.87335	7.32762	0.0377386	0.415682	3.33663	0.463281	4.40572	5.60416	0	1.38984	0	0
ENSMUSG00000031278	Acsl4	acyl-CoA synthetase long-chain family member 4	ProteinCoding	0.946885	1.92771	0.00401564	0.176654	12.0798	11.1329	11.7172	11.7659	12.7562	10.7674	11.4749	11.1564
ENSMUSG00000062825	Actg1	actin, gamma, cytoplasmic 1	ProteinCoding	1.04695	2.06615	0.00227061	0.128722	11.5495	10.5025	11.5481	12.2987	10.8016	10.6703	10.2314	10.6058
ENSMUSG00000052593	Adam17	a disintegrin and metallopeptidase domain 17	ProteinCoding	1.73986	3.34002	0.00182138	0.112744	9.27031	7.53046	11.4078	7.68252	8.72064	7.56208	7.32664	7.70266
ENSMUSG00000024256	Adcyap1	adenylate cyclase activating polypeptide 1	ProteinCoding	1.51837	2.86467	0.00699235	0.229568	8.03572	6.51735	9.21834	8.44444	6.44437	7.16595	5.87405	6.51204
ENSMUSG00000033717	Adra2a	adrenergic receptor, alpha 2a	ProteinCoding	0.9091	1.87787	0.00694452	0.228966	10.6252	9.71605	11.0033	11.1863	9.6858	9.73294	9.69045	9.72477
ENSMUSG00000036932	Aifm1	apoptosis-inducing factor, mitochondrion-associated 1	ProteinCoding	1.96181	3.89551	0.00092191	0.0753	9.24796	7.28615	9.38739	9.5563	8.80018	6.48087	8.41185	6.96573
ENSMUSG00000028393	Alad	aminolevulinate, delta-, dehydratase	ProteinCoding	0.84388	1.79487	0.0100622	0.268175	10.9662	10.1223	10.3725	11.5893	10.9366	10.3726	10.2229	9.77137
ENSMUSG00000025270	Alas2	aminolevulinic acid synthase 2, erythroid	ProteinCoding	1.23446	2.35293	0.0255936	0.367627	8.6211	7.38664	9.28559	9.07164	7.50606	6.88858	6.98374	8.2876
ENSMUSG00000013584	Aldh1a2	aldehyde dehydrogenase family 1, subfamily A2	ProteinCoding	0.921741	1.8944	0.0372771	0.413336	8.44482	7.52307	7.50198	10.2098	7.62267	7.60474	7.26871	7.69577
ENSMUSG00000031543	Ank1	ankyrin 1, erythroid	ProteinCoding	2.21901	4.65574	0.00086892	0.0727085	11.9917	9.77268	11.7934	10.8837	13.2979	10.9326	8.84247	9.54296
ENSMUSG00000036452	Arhgap26	Rho GTPase activating protein 26	ProteinCoding	1.35266	2.55382	0.00346058	0.162329	7.90338	6.55072	7.18352	8.92509	7.60151	6.75426	6.03908	6.85882
ENSMUSG00000035133	Arhgap5	Rho GTPase activating protein 5	ProteinCoding	1.79368	3.46699	9.01e-05	0.0159048	13.3869	11.5932	14.1721	11.7616	14.227	11.7306	11.6916	11.3574
ENSMUSG00000030509	Asb7	ankyrin repeat and SOCS box-containing 7	ProteinCoding	1.47593	2.78163	0.00158169	0.103372	10.7526	9.27672	10.8059	11.069	10.383	8.6801	10.1645	8.98556
ENSMUSG00000026463	Atp2b4	ATPase, Ca++ transporting, plasma membrane 4	ProteinCoding	0.978668	1.97064	0.00838771	0.247549	14.0301	13.0514	14.6076	14.5105	12.9722	12.7433	12.9418	13.4691
ENSMUSG00000052459	Atp6v1a	ATPase, H+ transporting, lysosomal V1 subunit A	ProteinCoding	1.78323	3.44196	0.00782902	0.240468	14.7993	13.016	15.2447	14.9747	14.1784	14.3489	12.5213	12.1779
ENSMUSG00000042605	Atxn2	ataxin 2	ProteinCoding	0.912851	1.88276	0.00883255	0.253387	11.7971	10.8843	11.0696	12.7474	11.5743	10.9469	10.8666	10.8393
ENSMUSG00000020897	Aurkb	aurora kinase B	ProteinCoding	2.62672	6.1762	0.0421985	0.429385	2.62672	0	4.35388	0	3.52627	0	0	0
ENSMUSG00000024959	Bad	BCL2-associated agonist of cell death	ProteinCoding	0.871848	1.83001	0.00504767	0.197159	9.50036	8.62851	9.89324	9.6495	8.95835	8.6971	8.90084	8.2876
ENSMUSG00000045763	Basp1	brain abundant, membrane attached signal protein 1	ProteinCoding	0.884054	1.84555	0.0103253	0.270298	13.7728	12.8887	14.4278	14.2067	12.6838	12.7649	12.8155	13.0857
ENSMUSG00000053175	Bcl3	B cell leukemia/lymphoma 3	ProteinCoding	0.838286	1.78793	0.0195666	0.34022	5.77217	4.93388	6.24412	5.9253	5.14708	5.02679	4.87921	4.89563
ENSMUSG00000061132	Blnk	B cell linker	ProteinCoding	0.812357	1.75608	0.0203195	0.344177	8.89661	8.08425	9.30107	9.30292	8.08583	8.12787	7.77454	8.35033
ENSMUSG00000036896	C1qc	complement component 1, q subcomponent, C chain	ProteinCoding	0.805438	1.74768	0.00792627	0.241841	10.8481	10.0426	11.3781	10.2958	10.8703	10.3242	9.86553	9.93819
ENSMUSG00000024164	C3	complement component 3	ProteinCoding	1.49161	2.81202	0.0315679	0.392949	9.36433	7.87272	9.51086	7.58825	10.9939	9.11268	7.17721	7.32828
ENSMUSG00000051331	Cacna1c	calcium channel, voltage-dependent, L type, alpha 1C subunit	ProteinCoding	8.57052	380.176	1.35e-64	1.73e-60	8.57052	0	8.36029	8.69417	8.65711	0	0	0
ENSMUSG00000040118	Cacna2d1	calcium channel, voltage-dependent, alpha2/delta subunit 1	ProteinCoding	1.58033	2.99038	2.36e-05	0.00584025	8.76325	7.18292	8.44943	8.36328	9.47704	7.3985	6.82197	7.32828
ENSMUSG00000024617	Camk2a	calcium/calmodulin-dependent protein kinase II alpha	ProteinCoding	1.47333	2.77661	0.018251	0.333634	13.0917	11.6184	13.4752	13.446	12.354	12.1236	12.48	10.2516
ENSMUSG00000057897	Camk2b	calcium/calmodulin-dependent protein kinase II, beta	ProteinCoding	2.08	4.22808	0.0498873	0.44998	7.62329	5.54329	5.2057	5.52495	12.1392	5.16353	5.61979	5.84654
ENSMUSG00000021647	Cartpt	CART prepropeptide	ProteinCoding	0.993418	1.9909	0.0263854	0.371543	7.60214	6.60872	7.15352	8.69417	6.95873	7.02048	6.27804	6.52764
ENSMUSG00000031628	Casp3	caspase 3	ProteinCoding	1.66081	3.16194	0.00687983	0.228063	5.66537	4.00456	4.91513	5.04661	7.03437	4.56603	4.1362	3.31145
ENSMUSG00000026029	Casp8	caspase 8	ProteinCoding	0.847129	1.79892	0.0143339	0.306734	8.03053	7.1834	8.21169	8.50073	7.37918	6.78639	7.34077	7.42305
ENSMUSG00000032532	Cck	cholecystokinin	ProteinCoding	1.00927	2.0129	0.0499643	0.450004	9.69671	8.68744	10.7859	10.3292	7.97502	9.18073	7.84065	9.04094
ENSMUSG00000034165	Ccnd3	cyclin D3	ProteinCoding	6.64434	100.034	2.82e-14	3.32e-11	7.76379	1.11944	6.36688	9.20043	7.72405	0	1.36706	1.99127
ENSMUSG00000029385	Ccng2	cyclin G2	ProteinCoding	2.09757	4.27988	0.00059162	0.0581353	9.0252	6.92763	7.24883	11.1938	8.63298	6.65336	7.33372	6.79581
ENSMUSG00000000682	Cd52	CD52 antigen	ProteinCoding	0.848517	1.80065	0.0414262	0.428022	7.27831	6.42979	8.11769	6.38012	7.33712	6.78639	6.13946	6.36353
ENSMUSG00000024610	Cd74	CD74 antigen (invariant polypeptide of major histocompatibility complex, class II antigen-associated)	ProteinCoding	1.82099	3.53323	0.0053405	0.202167	10.7483	8.92734	11.8793	11.1305	9.23517	7.60474	9.59645	9.58083
ENSMUSG00000015396	Cd83	CD83 antigen	ProteinCoding	1.04765	2.06715	0.00063396	0.0605554	8.91476	7.86712	8.33043	8.96815	9.44572	7.93596	7.7641	7.90129
ENSMUSG00000053977	Cd8a	CD8 antigen, alpha chain	ProteinCoding	2.88358	7.37979	0.0315899	0.392949	3.16349	0.279912	6.09423	3.39624	0	0	0.839735	0
ENSMUSG00000033102	Cdc14b	CDC14 cell division cycle 14B	ProteinCoding	2.17273	4.50875	0.0314676	0.392725	4.60005	2.42733	2.64062	5.44114	5.71841	0.85619	3.85053	2.57526
ENSMUSG00000020307	Cdc34	cell division cycle 34	ProteinCoding	1.20124	2.29937	0.00241923	0.133936	8.17804	6.97681	8.44013	8.85395	7.24005	6.6764	7.03677	7.21725
ENSMUSG00000000303	Cdh1	cadherin 1	ProteinCoding	3.34632	10.1705	0.00037353	0.0429108	6.2734	2.92708	6.09423	8.97809	3.74789	3.7174	1.75239	3.31145
ENSMUSG00000037664	Cdkn1c	cyclin-dependent kinase inhibitor 1C (P57)	ProteinCoding	4.01571	16.1752	0.00508379	0.198015	5.65625	1.64054	6.12548	5.38243	5.46084	0	3.92742	0.994189
ENSMUSG00000026365	Cfh	complement component factor h	ProteinCoding	3.77454	13.6851	0.0258227	0.368698	8.8554	5.08086	10.6787	11.1943	4.69317	6.99321	4.2603	3.98909
ENSMUSG00000060002	Chpt1	choline phosphotransferase 1	ProteinCoding	1.80758	3.50054	0.0001333	0.0211888	8.41836	6.61079	8.88794	7.12513	9.24202	6.34367	6.5695	6.91919
ENSMUSG00000029516	Cit	citron	ProteinCoding	1.93267	3.81762	0.0285507	0.382355	7.27389	5.34122	10.5856	5.44114	5.79497	5.724	5.31093	4.98872
ENSMUSG00000000308	Ckmt1	creatine kinase, mitochondrial 1, ubiquitous	ProteinCoding	1.28578	2.43814	0.00903039	0.255557	10.6976	9.41179	9.86343	12.7955	9.4338	9.60368	8.98869	9.64301
ENSMUSG00000029661	Col1a2	collagen, type I, alpha 2	ProteinCoding	0.842161	1.79273	0.0241168	0.362105	10.3442	9.50204	10.2334	11.2431	9.55616	9.3005	9.36551	9.84012
ENSMUSG00000048126	Col6a3	collagen, type VI, alpha 3	ProteinCoding	0.927161	1.90153	0.0331528	0.398841	4.63629	3.70913	5.146	4.50182	4.26106	3.62568	3.92742	3.57429
ENSMUSG00000063889	Crem	cAMP responsive element modulator	ProteinCoding	0.993154	1.99053	0.0318154	0.394089	5.02647	4.03331	4.68279	5.70343	4.69317	4.40982	4.00042	3.68969
ENSMUSG00000049796	Crh	corticotropin releasing hormone	ProteinCoding	1.25488	2.38648	0.00237913	0.132858	7.36758	6.1127	6.53922	8.08816	7.47537	6.31459	5.73123	6.29228
ENSMUSG00000021680	Crhbp	corticotropin releasing hormone binding protein	ProteinCoding	1.33564	2.52388	0.0144611	0.30805	9.33774	8.0021	10.1683	10.1406	7.70434	7.5053	7.70526	8.79574
ENSMUSG00000017776	Crk	v-crk avian sarcoma virus CT10 oncogene homolog	ProteinCoding	1.41241	2.66181	0.0231916	0.358216	4.5699	3.1575	5.01863	4.84396	3.84711	3.96204	2.52063	2.98982
ENSMUSG00000007888	Crlf1	cytokine receptor-like factor 1	ProteinCoding	1.4204	2.6766	0.00114283	0.0861874	5.97224	4.55184	5.65443	6.65273	5.60957	4.35375	4.99092	4.31087
ENSMUSG00000032060	Cryab	crystallin, alpha B	ProteinCoding	3.12756	8.73957	0.0214322	0.349775	3.12756	0	4.72421	4.65848	0	0	0	0
ENSMUSG00000028199	Cryz	crystallin, zeta	ProteinCoding	1.66815	3.17807	0.0403456	0.42555	7.3047	5.63654	5.83542	5.67925	10.3994	6.28492	5.54856	5.07616
ENSMUSG00000024621	Csf1r	colony stimulating factor 1 receptor	ProteinCoding	1.67047	3.18317	0.0492613	0.448252	7.52612	5.85566	5.08372	8.82393	8.67072	7.43274	5.1913	4.94293
ENSMUSG00000034855	Cxcl10	chemokine (C-X-C motif) ligand 10	ProteinCoding	1.7429	3.34707	0.0143485	0.306937	3.00972	1.26682	2.64062	2.9873	3.40124	0.85619	1.36706	1.57721
ENSMUSG00000015340	Cybb	cytochrome b-245, beta polypeptide	ProteinCoding	1.1634	2.23985	0.00067805	0.062893	7.8546	6.69119	8.25472	7.73625	7.57281	7.14958	6.3356	6.58839
ENSMUSG00000063415	Cyp26b1	cytochrome P450, family 26, subfamily b, polypeptide 1	ProteinCoding	0.977038	1.96842	0.0416335	0.428596	8.25021	7.27318	8.77669	7.40131	8.57264	7.9783	7.04542	6.79581
ENSMUSG00000027797	Dclk1	doublecortin-like kinase 1	ProteinCoding	1.22359	2.33527	0.00128392	0.0919797	15.0668	13.8432	15.2451	15.9258	14.0294	13.6473	13.6879	14.1943
ENSMUSG00000039450	Dcxr	dicarbonyl L-xylulose reductase	ProteinCoding	1.01412	2.01967	0.0420216	0.429117	5.96217	4.94805	6.02963	6.36503	5.49184	5.50982	4.1362	5.19812
ENSMUSG00000058886	Deaf1	deformed epidermal autoregulatory factor 1 (Drosophila)	ProteinCoding	1.15376	2.22493	0.0122489	0.288245	9.98614	8.83238	10.0088	9.23402	10.7156	9.11689	8.06994	9.3103
ENSMUSG00000043051	Disc1	disrupted in schizophrenia 1	ProteinCoding	1.48557	2.80027	0.0490525	0.447759	2.89252	1.40695	0	6.7254	1.95216	1.38984	0.839735	1.99127
ENSMUSG00000026281	Dtymk	deoxythymidylate kinase	ProteinCoding	0.850938	1.80367	0.0358974	0.408819	8.51002	7.65908	8.52754	8.44444	8.55807	6.90817	8.22267	7.84639
ENSMUSG00000029071	Dvl1	dishevelled segment polarity protein 1	ProteinCoding	10.2371	1206.91	8.7e-36	3.88e-32	10.2371	0	8.69833	11.1317	10.8813	0	0	0
ENSMUSG00000028630	Dyrk2	dual-specificity tyrosine-(Y)-phosphorylation regulated kinase 2	ProteinCoding	0.816645	1.7613	0.0214254	0.34972	12.4082	11.5916	12.9249	12.8442	11.4555	11.2381	11.5581	11.9785
ENSMUSG00000036893	Ehmt1	euchromatic histone methyltransferase 1	ProteinCoding	1.5975	3.02619	0.00901003	0.255335	5.01723	3.41973	3.42277	3.61602	8.01291	3.30929	3.15335	3.79654
ENSMUSG00000045983	Eif4g1	eukaryotic translation initiation factor 4, gamma 1	ProteinCoding	1.18651	2.27601	0.00010464	0.0177725	13.9294	12.7429	13.4555	14.5463	13.7863	12.7385	12.4177	13.0725
ENSMUSG00000078812	Eif5a	eukaryotic translation initiation factor 5A	ProteinCoding	1.35663	2.56086	0.00390746	0.173607	9.95424	8.59761	9.25413	9.289	11.3196	8.93301	8.42848	8.43133
ENSMUSG00000039109	F13a1	coagulation factor XIII, A1 subunit	ProteinCoding	0.825919	1.77266	0.0474571	0.444347	8.49844	7.67252	8.27924	9.29697	7.91911	7.74211	7.13731	8.13814
ENSMUSG00000006369	Fbln1	fibulin 1	ProteinCoding	1.09491	2.13599	0.0185159	0.334624	8.10405	7.00915	7.75771	9.21733	7.33712	7.09932	7.41608	6.51204
ENSMUSG00000026656	Fcgr2b	Fc receptor, IgG, low affinity IIb	ProteinCoding	4.34901	20.379	4.37e-05	0.00935229	5.79371	1.4447	7.918	1.84748	7.61566	1.38984	1.36706	1.57721
ENSMUSG00000022788	Fgd4	FYVE, RhoGEF and PH domain containing 4	ProteinCoding	1.8994	3.73059	2.55e-06	0.00094615	8.14743	6.24803	7.98768	7.75373	8.70088	6.81781	5.89335	6.03293
ENSMUSG00000031565	Fgfr1	fibroblast growth factor receptor 1	ProteinCoding	1.83827	3.5758	0.00088253	0.0733347	9.30354	7.46527	9.55457	11.0978	7.25819	7.38458	7.57987	7.43137
ENSMUSG00000054252	Fgfr3	fibroblast growth factor receptor 3	ProteinCoding	1.39173	2.62393	0.00122341	0.0896481	9.42591	8.03418	8.1099	10.0911	10.0767	7.93118	7.97351	8.19785
ENSMUSG00000039899	Fgl2	fibrinogen-like protein 2	ProteinCoding	0.834825	1.78364	0.0110209	0.276366	8.66841	7.83358	8.79624	9.20679	8.00219	8.0725	7.63249	7.79576
ENSMUSG00000008136	Fhl2	four and a half LIM domains 2	ProteinCoding	0.99856	1.99801	0.0293293	0.384815	10.0999	9.10132	10.8557	10.6878	8.75618	8.5798	9.06512	9.65903
ENSMUSG00000024222	Fkbp5	FK506 binding protein 5	ProteinCoding	1.64598	3.12959	0.00600004	0.213878	4.24041	2.59444	4.84177	2.9873	4.89217	2.33664	2.8714	2.57526
ENSMUSG00000029563	Foxp2	forkhead box P2	ProteinCoding	1.40642	2.65079	0.0197974	0.34174	11.9061	10.4997	11.4275	12.2847	12.006	11.4061	10.8519	9.24104
ENSMUSG00000028034	Fubp1	far upstream element (FUSE) binding protein 1	ProteinCoding	0.87607	1.83537	0.00023308	0.0312564	7.92596	7.04989	7.84478	8.06034	7.87276	7.36344	6.83201	6.95423
ENSMUSG00000070880	Gad1	glutamate decarboxylase 1	ProteinCoding	2.98931	7.94095	0.0019912	0.119449	14.5354	11.5461	11.5581	16.1096	15.9384	12.2587	11.1599	11.2196
ENSMUSG00000020530	Ggnbp2	gametogenetin binding protein 2	ProteinCoding	1.19951	2.29662	0.03163	0.392949	8.10082	6.90131	8.56791	8.89127	6.84329	7.45289	5.94973	7.30131
ENSMUSG00000027523	Gnas	GNAS (guanine nucleotide binding protein, alpha stimulating) complex locus	ProteinCoding	1.7303	3.31798	0.00039734	0.0443552	10.2182	8.48794	11.0726	10.6832	8.89888	8.14449	9.05016	8.26916
ENSMUSG00000029314	Gpat3	glycerol-3-phosphate acyltransferase 3	ProteinCoding	1.60402	3.03988	0.00503308	0.197092	7.35175	5.74773	6.90607	5.35216	9.79701	5.78886	5.4214	6.03293
ENSMUSG00000025892	Gria4	glutamate receptor, ionotropic, AMPA4 (alpha 4)	ProteinCoding	0.909641	1.87858	0.0117252	0.283458	10.2644	9.35479	10.4972	10.8543	9.44176	9.25722	9.06725	9.73991
ENSMUSG00000022935	Grik1	glutamate receptor, ionotropic, kainate 1	ProteinCoding	1.29621	2.45582	0.0120299	0.286603	8.69786	7.40165	8.53046	9.01238	8.55073	8.0462	7.79521	6.36353
ENSMUSG00000034813	Grip1	glutamate receptor interacting protein 1	ProteinCoding	1.46221	2.7553	2.91e-05	0.00683964	10.624	9.16181	10.8191	10.8042	10.2488	8.54892	9.23735	9.69917
ENSMUSG00000033318	Gstt2	glutathione S-transferase, theta 2	ProteinCoding	0.870529	1.82833	0.00554133	0.205077	5.88355	5.01302	5.94457	5.86225	5.84384	4.87572	5.36722	4.79613
ENSMUSG00000028864	Hgf	hepatocyte growth factor	ProteinCoding	1.21267	2.31767	5.94e-05	0.0117714	8.44541	7.23273	8.8719	8.59746	7.86686	7.37052	7.16932	7.15836
ENSMUSG00000046711	Hmga1	high mobility group AT-hook 1	ProteinCoding	1.15034	2.21966	6.13e-05	0.0120282	7.34322	6.19288	7.68091	7.37896	6.96978	6.05811	6.0563	6.46422
ENSMUSG00000007617	Homer1	homer scaffolding protein 1	ProteinCoding	0.959401	1.9445	0.00835082	0.247191	13.6236	12.6642	14.0983	14.0129	12.7594	12.4394	12.3761	13.1769
ENSMUSG00000046321	Hs3st2	heparan sulfate (glucosamine) 3-O-sulfotransferase 2	ProteinCoding	1.08518	2.12165	0.0313334	0.392291	10.9096	9.82445	11.9127	11.4794	9.33683	9.06546	9.92768	10.4802
ENSMUSG00000090877	Hspa1b	heat shock protein 1B	ProteinCoding	0.845072	1.79635	0.00175564	0.109889	10.0696	9.22457	10.2378	10.3107	9.66045	9.29679	8.87681	9.50012
ENSMUSG00000034997	Htr2a	5-hydroxytryptamine (serotonin) receptor 2A	ProteinCoding	0.838203	1.78782	0.00834974	0.247191	12.2341	11.3959	12.5174	12.4488	11.736	10.9433	11.3665	11.8779
ENSMUSG00000032269	Htr3a	5-hydroxytryptamine (serotonin) receptor 3A	ProteinCoding	0.804158	1.74613	0.0294928	0.385544	7.67481	6.87065	8.07831	8.16419	6.78192	6.86871	6.60505	7.13818
ENSMUSG00000037405	Icam1	intercellular adhesion molecule 1	ProteinCoding	0.851962	1.80495	4.5e-05	0.00957379	9.30912	8.45716	9.40501	9.4831	9.03926	8.27475	8.42185	8.67488
ENSMUSG00000048583	Igf2	insulin-like growth factor 2	ProteinCoding	1.09404	2.13471	0.0105167	0.272222	10.0321	8.93805	9.87266	11.2569	8.96665	8.69428	9.10911	9.01074
ENSMUSG00000017493	Igfbp4	insulin-like growth factor binding protein 4	ProteinCoding	0.83694	1.78626	0.0308042	0.390056	12.6512	11.8143	12.8568	12.7682	12.3287	11.3145	12.5392	11.5892
ENSMUSG00000024810	Il33	interleukin 33	ProteinCoding	2.86029	7.2616	0.0445235	0.436276	12.0089	9.14857	11.4423	11.9417	12.6426	8.57368	11.2912	7.58087
ENSMUSG00000031392	Irak1	interleukin-1 receptor-associated kinase 1	ProteinCoding	0.900893	1.86722	0.00014709	0.0226913	9.62426	8.72337	9.85879	9.68789	9.32612	8.42855	8.78164	8.95992
ENSMUSG00000037206	Islr	immunoglobulin superfamily containing leucine-rich repeat	ProteinCoding	1.70452	3.25921	0.00144559	0.0975298	8.43042	6.7259	8.44013	10.0945	6.75661	6.66493	6.85187	6.66089
ENSMUSG00000030786	Itgam	integrin alpha M	ProteinCoding	1.1444	2.21054	0.0320243	0.395058	9.52423	8.37983	10.1138	11.4565	7.00243	8.05941	7.81558	9.2645
ENSMUSG00000023150	Ivns1abp	influenza virus NS1A binding protein	ProteinCoding	1.26548	2.40407	0.00307074	0.153444	8.83514	7.56966	8.55649	9.50906	8.43986	7.11627	7.37549	8.21721
ENSMUSG00000026824	Kcnj3	potassium inwardly-rectifying channel, subfamily J, member 3	ProteinCoding	1.21088	2.31479	0.0169899	0.324514	7.84703	6.63614	7.97487	8.49034	7.07587	5.92976	7.37549	6.60318
ENSMUSG00000043301	Kcnj6	potassium inwardly-rectifying channel, subfamily J, member 6	ProteinCoding	1.03949	2.0555	0.00997435	0.267796	11.2851	10.2456	11.8787	12.0337	9.94295	10.1271	10.0648	10.5449
ENSMUSG00000003308	Keap1	kelch-like ECH-associated protein 1	ProteinCoding	0.961988	1.94799	0.00936792	0.260302	8.11297	7.15098	8.06628	8.90176	7.37086	6.99321	7.09626	7.36346
ENSMUSG00000037465	Klf10	Kruppel-like factor 10	ProteinCoding	0.812396	1.75613	0.0242601	0.362577	11.6623	10.8499	11.9641	12.2259	10.797	10.4347	10.85	11.2651
ENSMUSG00000005148	Klf5	Kruppel-like factor 5	ProteinCoding	0.837085	1.78644	0.00556991	0.205561	10.655	9.8179	10.901	10.9975	10.0665	9.85156	9.48321	10.1189
ENSMUSG00000028986	Klhl7	kelch-like 7	ProteinCoding	2.99455	7.96986	0.0367652	0.411214	6.11612	3.12157	3.31846	10.5064	4.52355	3.05177	3.15335	3.15958
ENSMUSG00000063229	Ldha	lactate dehydrogenase A	ProteinCoding	4.16593	17.9502	0.0188255	0.336619	8.99599	4.83006	7.8588	6.28716	12.842	5.65608	4.2603	4.5738
ENSMUSG00000027985	Lef1	lymphoid enhancer binding factor 1	ProteinCoding	0.847011	1.79877	0.0217942	0.351687	8.03368	7.18667	8.07831	8.69417	7.32856	7.35632	7.38233	6.82135
ENSMUSG00000068220	Lgals1	lectin, galactose binding, soluble 1	ProteinCoding	0.835048	1.78392	0.00257482	0.138732	8.18932	7.35428	8.3831	8.37838	7.8065	7.6578	7.11282	7.29221
ENSMUSG00000022587	Ly6e	lymphocyte antigen 6 complex, locus E	ProteinCoding	3.80594	13.9863	2.76e-06	0.00100893	3.80594	0	4.50411	3.27238	3.64133	0	0	0
ENSMUSG00000069516	Lyz2	lysozyme 2	ProteinCoding	1.23293	2.35043	0.00209982	0.123126	9.99646	8.76354	9.92244	9.89501	10.1719	9.42816	8.06994	8.79251
ENSMUSG00000045095	Magi1	membrane associated guanylate kinase, WW and PDZ domain containing 1	ProteinCoding	0.913697	1.88387	0.027383	0.376161	6.90165	5.98795	9.88413	5.15581	5.66501	5.70171	6.39096	5.8712
ENSMUSG00000020623	Map2k6	mitogen-activated protein kinase kinase 6	ProteinCoding	0.802506	1.74413	0.0401297	0.424816	10.9239	10.1214	10.9601	11.1182	10.6933	10.6494	10.3277	9.38712
ENSMUSG00000026074	Map4k4	mitogen-activated protein kinase kinase kinase kinase 4	ProteinCoding	1.5622	2.95304	0.0459283	0.440098	9.76172	8.19951	7.59422	13.5357	8.15524	7.89235	8.54287	8.16332
ENSMUSG00000063358	Mapk1	mitogen-activated protein kinase 1	ProteinCoding	0.827778	1.77495	0.00504863	0.197159	9.6196	8.79182	9.45199	10.0073	9.39947	8.40115	9.16576	8.80856
ENSMUSG00000053436	Mapk14	mitogen-activated protein kinase 14	ProteinCoding	0.80785	1.7506	0.0146112	0.309149	11.9788	11.171	12.1114	12.4231	11.402	10.6355	11.4765	11.4009
ENSMUSG00000005583	Mef2c	myocyte enhancer factor 2C	ProteinCoding	2.09854	4.28276	0.0456505	0.439359	8.4187	6.32016	6.48	11.4475	7.32856	7.61073	5.1913	6.15844
ENSMUSG00000030218	Mgp	matrix Gla protein	ProteinCoding	1.37875	2.60043	0.00312629	0.155045	9.3033	7.92456	9.04532	10.5149	8.34968	7.94548	7.54978	8.27841
ENSMUSG00000032470	Mras	muscle and microspikes RAS	ProteinCoding	2.26719	4.81383	0.00067007	0.0624922	5.10568	2.83849	5.85419	6.34979	3.11305	2.33664	3.01926	3.15958
ENSMUSG00000026712	Mrc1	mannose receptor, C type 1	ProteinCoding	1.07815	2.11132	0.00027867	0.035425	9.66946	8.59131	9.57594	10.1745	9.25789	8.84932	8.33631	8.5883
ENSMUSG00000024436	Mrps18b	mitochondrial ribosomal protein S18B	ProteinCoding	1.18353	2.27131	0.0478616	0.444846	3.66219	2.47866	3.61117	4.26236	3.11305	2.73807	2.70665	1.99127
ENSMUSG00000025044	Msr1	macrophage scavenger receptor 1	ProteinCoding	1.22303	2.33437	0.00074548	0.0665598	5.90672	4.68369	5.65443	5.86225	6.20349	4.61455	4.31856	5.11797
ENSMUSG00000022346	Myc	myelocytomatosis oncogene	ProteinCoding	1.3058	2.4722	0.0162634	0.320038	5.61191	4.30611	4.80364	5.0083	7.0238	4.10476	4.06991	4.74367
ENSMUSG00000048612	Myof	myoferlin	ProteinCoding	2.19511	4.57925	0.0322429	0.395449	6.2022	4.00709	3.08406	9.94151	5.58102	3.80364	3.7693	4.44832
ENSMUSG00000026107	Nabp1	nucleic acid binding protein 1	ProteinCoding	1.85462	3.61657	0.0102392	0.269893	7.5123	5.65768	8.10207	8.19437	6.24047	6.86871	4.75813	5.34619
ENSMUSG00000020647	Ncoa1	nuclear receptor coactivator 1	ProteinCoding	1.2292	2.34436	0.0424217	0.430186	3.82333	2.59414	2.64062	1.45021	7.37918	3.7174	1.75239	2.31262
ENSMUSG00000039697	Ncoa7	nuclear receptor coactivator 7	ProteinCoding	3.98	15.7797	6.39e-08	3.55e-05	3.98	0	3.99639	4.19572	3.74789	0	0	0
ENSMUSG00000025582	Nptx1	neuronal pentraxin 1	ProteinCoding	1.20264	2.3016	0.0220371	0.35261	14.1948	12.9922	14.9329	15.0141	12.6374	12.1343	13.0387	13.8035
ENSMUSG00000002108	Nr1h3	nuclear receptor subfamily 1, group H, member 3	ProteinCoding	1.20452	2.30461	0.0416868	0.428596	4.08466	2.88014	3.52004	4.88683	3.84711	3.05177	3.27604	2.31262
ENSMUSG00000024431	Nr3c1	nuclear receptor subfamily 3, group C, member 1	ProteinCoding	1.98899	3.96958	0.00856969	0.249637	5.11962	3.13064	3.61117	8.48337	3.26433	3.7174	3.68323	1.99127
ENSMUSG00000026826	Nr4a2	nuclear receptor subfamily 4, group A, member 2	ProteinCoding	2.26342	4.8013	0.00025936	0.03351	7.2283	4.96488	7.74771	6.88193	7.05527	3.62568	5.49903	5.76993
ENSMUSG00000028341	Nr4a3	nuclear receptor subfamily 4, group A, member 3	ProteinCoding	1.36092	2.56849	0.0344577	0.403828	4.13789	2.77696	3.77778	6.36503	2.27084	3.18626	3.15335	1.99127
ENSMUSG00000039114	Nrn1	neuritin 1	ProteinCoding	4.28194	19.4532	5.35e-15	6.82e-12	7.32731	3.04538	6.40558	8.12444	7.45191	3.62568	2.52063	2.98982
ENSMUSG00000024109	Nrxn1	neurexin I	ProteinCoding	1.0511	2.07211	0.00093325	0.075864	8.30252	7.25142	8.495	8.52807	7.88449	7.62856	6.85187	7.27383
ENSMUSG00000057406	Nsd2	nuclear receptor binding SET domain protein 2	ProteinCoding	2.48682	5.60541	0.023424	0.35938	4.23901	1.75219	3.99639	3.97508	4.74555	3.42264	0.839735	0.994189
ENSMUSG00000019890	Nts	neurotensin	ProteinCoding	0.882835	1.84399	0.0340536	0.401911	9.0199	8.13707	8.486	9.74289	8.83081	8.4387	7.5003	8.4722
ENSMUSG00000026833	Olfm1	olfactomedin 1	ProteinCoding	1.08709	2.12445	0.00763626	0.238257	12.4397	11.3526	13.2974	13.0251	10.9966	11.5681	11.3942	11.0956
ENSMUSG00000019916	P4ha1	procollagen-proline, 2-oxoglutarate 4-dioxygenase (proline 4-hydroxylase), alpha 1 polypeptide	ProteinCoding	1.66812	3.178	0.0431558	0.432452	10.5614	8.89333	9.64091	12.8907	9.15271	9.06109	8.03995	9.57896
ENSMUSG00000030774	Pak1	p21 protein (Cdc42/Rac)-activated kinase 1	ProteinCoding	0.856135	1.81018	0.00099002	0.0783068	13.3316	12.4755	13.4837	13.7776	12.7335	12.4748	12.3315	12.6202
ENSMUSG00000027168	Pax6	paired box 6	ProteinCoding	5.54586	46.7166	2.08e-15	2.74e-12	5.54586	0	4.91513	6.17056	5.5519	0	0	0
ENSMUSG00000001120	Pcbp3	poly(rC) binding protein 3	ProteinCoding	1.38587	2.61329	0.011953	0.285569	7.81668	6.43082	6.62918	10.1295	6.69135	5.87105	6.44426	6.97713
ENSMUSG00000051375	Pcdh1	protocadherin 1	ProteinCoding	1.25193	2.3816	0.0206195	0.346231	5.16221	3.91027	3.85439	7.44499	4.18723	3.88501	3.7693	4.0765
ENSMUSG00000019990	Pde7b	phosphodiesterase 7B	ProteinCoding	1.2903	2.44579	0.0320403	0.395066	3.95674	2.66644	4.91513	1.84748	5.1076	2.90343	2.52063	2.57526
ENSMUSG00000000301	Pemt	phosphatidylethanolamine N-methyltransferase	ProteinCoding	0.93414	1.91075	0.0433497	0.432939	5.97785	5.04371	4.64015	6.77188	6.5215	5.02679	4.75813	5.34619
ENSMUSG00000020893	Per1	period circadian clock 1	ProteinCoding	1.70392	3.25785	0.00616645	0.216349	12.8101	11.1062	13.066	13.0015	12.3629	9.71357	12.1104	11.4947
ENSMUSG00000021196	Pfkp	phosphofructokinase, platelet	ProteinCoding	0.861611	1.81707	0.00024492	0.0323184	13.5867	12.7251	13.7442	13.6643	13.3517	12.4907	12.5366	13.1481
ENSMUSG00000022565	Plec	plectin	ProteinCoding	3.03342	8.18746	0.00515166	0.199258	9.2436	6.21018	5.26303	10.8817	11.586	6.00449	6.50824	6.1178
ENSMUSG00000016487	Ppfibp1	PTPRF interacting protein, binding protein 1 (liprin beta 1)	ProteinCoding	1.05099	2.07195	0.00256014	0.138062	9.90239	8.8514	10.2316	9.02202	10.4536	8.91375	8.71542	8.92502
ENSMUSG00000004207	Psap	prosaposin	ProteinCoding	1.33767	2.52743	0.00532561	0.202167	10.3665	9.0288	10.0399	9.25872	11.8008	9.24379	8.59684	9.24576
ENSMUSG00000019969	Psen1	presenilin 1	ProteinCoding	1.2949	2.4536	0.0209477	0.347269	10.9684	9.67351	11.1029	11.2118	10.5905	9.73705	8.64317	10.6403
ENSMUSG00000068744	Psrc1	proline/serine-rich coiled-coil 1	ProteinCoding	1.44424	2.72119	0.00295807	0.150304	6.18551	4.74127	6.53922	7.12513	4.89217	4.87572	4.7154	4.63268
ENSMUSG00000020415	Pttg1	pituitary tumor-transforming gene 1	ProteinCoding	2.20545	4.61217	0.00209755	0.123126	4.78388	2.57843	6.01301	1.84748	6.49114	2.55127	2.8714	2.31262
ENSMUSG00000020149	Rab1a	RAB1A, member RAS oncogene family	ProteinCoding	1.77794	3.42935	0.0229417	0.356775	14.1325	12.3545	14.207	14.3367	13.8537	13.8783	11.6346	11.5506
ENSMUSG00000062115	Rai1	retinoic acid induced 1	ProteinCoding	1.82951	3.55416	0.0163107	0.320091	4.98037	3.15086	4.72421	5.81863	4.39827	2.33664	4.31856	2.79738
ENSMUSG00000010067	Rassf1	Ras association (RalGDS/AF-6) domain family member 1	ProteinCoding	1.77265	3.4168	0.00210154	0.123126	4.22809	2.45544	4.76447	3.39624	4.52355	2.08441	2.70665	2.57526
ENSMUSG00000024990	Rbp4	retinol binding protein 4, plasma	ProteinCoding	5.19193	36.5532	0.0491172	0.448016	6.93061	1.73868	9.72619	8.31308	2.75255	2.90343	0	2.31262
ENSMUSG00000039601	Rcan2	regulator of calcineurin 2	ProteinCoding	2.80831	7.00462	0.00014948	0.0229914	5.35736	2.54906	7.22739	2.82042	6.02428	2.55127	2.52063	2.57526
ENSMUSG00000029110	Rnf4	ring finger protein 4	ProteinCoding	0.988409	1.984	0.00997014	0.267794	10.9395	9.95111	11.0595	10.9459	10.8132	9.18073	10.5168	10.1558
ENSMUSG00000039221	Rpl22l1	ribosomal protein L22 like 1	ProteinCoding	1.35172	2.55216	1.05e-07	5.53e-05	9.70759	8.35587	9.82825	9.84289	9.45164	8.48184	8.61439	7.97139
ENSMUSG00000020088	Sar1a	secretion associated Ras related GTPase 1A	ProteinCoding	2.12871	4.37327	5.25e-20	1.02e-16	13.0504	10.9217	13.2021	13.32	12.6291	11.1601	10.8476	10.7574
ENSMUSG00000023927	Satb1	special AT-rich sequence binding protein 1	ProteinCoding	0.893089	1.85715	0.0117709	0.283992	11.982	11.0889	12.1741	12.5293	11.2425	10.5869	11.2035	11.4762
ENSMUSG00000021687	Scamp1	secretory carrier membrane protein 1	ProteinCoding	0.829759	1.77739	0.010844	0.275046	6.00817	5.17841	5.83542	6.06251	6.12658	4.75104	5.47361	5.31057
ENSMUSG00000050711	Scg2	secretogranin II	ProteinCoding	0.939383	1.91771	0.00271732	0.14243	13.5645	12.6251	12.9274	13.4695	14.2965	12.8114	12.5221	12.5417
ENSMUSG00000007279	Scube2	signal peptide, CUB domain, EGF-like 2	ProteinCoding	2.17008	4.50049	0.00759834	0.23761	4.30645	2.13637	2.64062	8.0079	2.27084	1.38984	2.70665	2.31262
ENSMUSG00000035325	Sec31a	Sec31 homolog A (S. cerevisiae)	ProteinCoding	2.2479	4.7499	0.0467179	0.442617	11.0372	8.78934	11.3687	10.8771	10.8659	10.7464	7.1534	8.46817
ENSMUSG00000057969	Sema3b	sema domain, immunoglobulin domain (Ig), short basic domain, secreted, (semaphorin) 3B	ProteinCoding	3.92518	15.1913	0.00223676	0.127835	4.21057	0.285397	1.31962	4.38705	6.92506	0.85619	0	0
ENSMUSG00000070436	Serpinh1	serine (or cysteine) peptidase inhibitor, clade H, member 1	ProteinCoding	0.872303	1.83058	0.0244144	0.362765	10.3828	9.51054	10.5529	10.4986	10.097	9.15225	9.1538	10.2256
ENSMUSG00000042557	Sin3a	transcriptional regulator, SIN3A (yeast)	ProteinCoding	1.3766	2.59655	0.00040564	0.0449635	12.067	10.6904	11.2247	12.1537	12.8225	10.6185	10.3152	11.1375
ENSMUSG00000025161	Slc16a3	solute carrier family 16 (monocarboxylic acid transporters), member 3	ProteinCoding	4.0177	16.1975	0.00341167	0.161846	7.33876	3.32105	7.9269	7.0135	7.07587	5.16353	4.79963	0
ENSMUSG00000024650	Slc22a6	solute carrier family 22 (organic anion transporter), member 6	ProteinCoding	1.81909	3.52859	0.00155963	0.10263	7.97148	6.15239	7.33156	10.017	6.56587	6.12663	5.94973	6.38081
ENSMUSG00000031596	Slc7a2	solute carrier family 7 (cationic amino acid transporter, y+ system), member 2	ProteinCoding	0.853395	1.80675	0.0313421	0.3923	10.3186	9.46521	11.627	9.71342	9.61542	9.39729	9.53019	9.46815
ENSMUSG00000027273	Snap25	synaptosomal-associated protein 25	ProteinCoding	0.904921	1.87244	0.0228048	0.356148	11.2914	10.3865	11.7879	11.8308	10.2556	10.8018	9.90885	10.4488
ENSMUSG00000024534	Sncaip	synuclein, alpha interacting protein (synphilin)	ProteinCoding	1.6435	3.12423	0.0441565	0.435268	5.38697	3.74347	3.61117	4.12586	8.42388	5.09678	1.75239	4.38123
ENSMUSG00000038301	Snx10	sorting nexin 10	ProteinCoding	2.31659	4.98152	0.0004831	0.0506289	6.24984	3.93326	7.33156	3.51031	7.90766	3.80364	4.19958	3.79654
ENSMUSG00000053113	Socs3	suppressor of cytokine signaling 3	ProteinCoding	0.936513	1.9139	2.48e-06	0.00092567	8.26567	7.32916	8.34378	8.41911	8.03413	7.20609	7.46204	7.31934
ENSMUSG00000018593	Sparc	secreted acidic cysteine rich glycoprotein	ProteinCoding	1.78301	3.44144	0.00010703	0.0180893	14.0214	12.2384	14.3289	14.9815	12.7538	12.6054	12.4561	11.6537
ENSMUSG00000047963	Stbd1	starch binding domain 1	ProteinCoding	1.05048	2.07121	0.00556978	0.205561	6.75228	5.7018	7.08364	7.10712	6.06607	6.02259	5.33935	5.74346
ENSMUSG00000026797	Stxbp1	syntaxin binding protein 1	ProteinCoding	1.03829	2.0538	0.025712	0.36815	14.3865	13.3482	14.9808	14.9162	13.2626	13.0154	12.8887	14.1405
ENSMUSG00000009394	Syn2	synapsin II	ProteinCoding	5.83363	57.0292	1.01e-13	1.12e-10	6.73033	0.896705	5.01863	7.77671	7.39566	0.85619	0.839735	0.994189
ENSMUSG00000024807	Syvn1	synovial apoptosis inhibitor 1, synoviolin	ProteinCoding	1.04173	2.05869	0.031891	0.39447	8.6966	7.65487	7.79706	9.17687	9.11588	8.35905	7.06257	7.54301
ENSMUSG00000041459	Tardbp	TAR DNA binding protein	ProteinCoding	4.32139	19.9925	0.0012895	0.092186	8.39483	4.07344	7.80191	8.26919	9.11339	3.05177	6.5933	2.57526
ENSMUSG00000032411	Tfdp2	transcription factor Dp 2	ProteinCoding	1.81725	3.5241	0.0034965	0.162907	3.94529	2.12804	3.42277	4.88683	3.52627	2.33664	2.0562	1.99127
ENSMUSG00000034310	Tmem132d	transmembrane protein 132D	ProteinCoding	0.991739	1.98858	0.00352823	0.16372	12.5258	11.5341	12.8854	13.0081	11.6841	11.1364	11.6606	11.8053
ENSMUSG00000024401	Tnf	tumor necrosis factor	ProteinCoding	2.55756	5.8871	0.0117005	0.28324	4.1095	1.55194	4.87892	2.9873	4.46227	2.90343	1.75239	0
ENSMUSG00000027940	Tpm3	tropomyosin 3, gamma	ProteinCoding	1.10417	2.14975	9.1e-05	0.016011	9.02396	7.91979	9.19091	9.06232	8.81864	7.92639	7.5003	8.33269
ENSMUSG00000059552	Trp53	transformation related protein 53	ProteinCoding	1.42845	2.69157	1.09e-11	9.7e-09	9.01701	7.58856	8.82983	9.31081	8.9104	7.48587	7.72155	7.55827
ENSMUSG00000022010	Tsc22d1	TSC22 domain family, member 1	ProteinCoding	0.903973	1.87121	1.29e-06	0.00053274	13.6287	12.7247	13.6835	13.5443	13.6582	12.3691	12.8703	12.9347
ENSMUSG00000031431	Tsc22d3	TSC22 domain family, member 3	ProteinCoding	1.07254	2.10313	0.0216369	0.350654	9.154	8.08146	8.36357	10.8956	8.20285	8.33753	8.12403	7.78282
ENSMUSG00000049580	Tsku	tsukushi, small leucine rich proteoglycan	ProteinCoding	3.18594	9.10048	0.0456879	0.439472	6.42936	3.24342	6.24412	7.37896	5.66501	0	5.28194	4.44832
ENSMUSG00000030137	Tuba8	tubulin, alpha 8	ProteinCoding	0.998176	1.99747	0.0249171	0.364962	9.0934	8.09522	9.44427	9.76028	8.07564	7.64618	7.95066	8.68882
ENSMUSG00000007805	Twist2	twist basic helix-loop-helix transcription factor 2	ProteinCoding	2.59647	6.04806	0.00493793	0.195211	4.11306	1.51659	4.5509	4.38705	3.40124	0	1.75239	2.79738
ENSMUSG00000001403	Ube2c	ubiquitin-conjugating enzyme E2C	ProteinCoding	2.90683	7.49971	0.00290006	0.148533	2.90683	0	4.35388	2.41446	1.95216	0	0	0
ENSMUSG00000025326	Ube3a	ubiquitin protein ligase E3A	ProteinCoding	1.91591	3.77352	0.0376653	0.415491	4.69006	2.77415	5.146	2.9873	5.93688	1.77853	2.30702	4.2369
ENSMUSG00000029512	Ulk1	unc-51 like kinase 1	ProteinCoding	3.18541	9.09712	0.013047	0.295858	9.95855	6.77314	9.24882	10.5311	10.0958	9.11479	5.96805	5.23659
ENSMUSG00000020099	Unc5b	unc-5 netrin receptor B	ProteinCoding	1.08819	2.12607	0.00205026	0.12179	7.66792	6.57973	7.57736	7.09802	8.32837	6.75426	6.5207	6.46422
ENSMUSG00000020407	Upp1	uridine phosphorylase 1	ProteinCoding	0.942855	1.92233	0.013037	0.295788	6.31435	5.3715	6.17112	6.49541	6.27651	5.50982	4.75813	5.84654
ENSMUSG00000037428	Vgf	VGF nerve growth factor inducible	ProteinCoding	1.12002	2.1735	0.0205444	0.34585	14.1826	13.0626	14.6007	14.4535	13.4937	13.5609	12.0462	13.5807
ENSMUSG00000026728	Vim	vimentin	ProteinCoding	0.940601	1.91933	0.00019717	0.0280153	11.2859	10.3453	10.946	11.2343	11.6773	10.6132	10.2531	10.1695
ENSMUSG00000024283	Wac	WW domain containing adaptor with coiled-coil	ProteinCoding	3.80219	13.95	0.00935703	0.260141	11.4355	7.63336	11.1161	11.7684	11.4222	9.92072	6.39096	6.58839
ENSMUSG00000036856	Wnt4	wingless-type MMTV integration site family, member 4	ProteinCoding	0.933744	1.91023	0.0396959	0.422616	9.50909	8.57535	10.3254	10.1161	8.08583	8.70272	8.01814	9.00519
ENSMUSG00000053581	Zfand2a	zinc finger, AN1-type domain 2A	ProteinCoding	1.15281	2.22347	0.0187555	0.336262	10.1796	9.02677	10.2731	11.4873	8.77835	8.7139	8.71271	9.6537
ENSMUSG00000039671	Zmynd8	zinc finger, MYND-type containing 8	ProteinCoding	0.88244	1.84349	0.0442022	0.43534	12.4303	11.5479	12.2598	12.6124	12.4187	12.3475	10.8872	11.4088
down_Test_vs_Control
Annotation				DE Statistic				FPKM
Track_id	Gene_Name	Description	Gene_Type	log2FC	Fold_Change	p_value	q_value	Test_FPKM	Control_FPKM	A1	A2	A3	B1	B2	B3
ENSMUSG00000040997	Abhd4	abhydrolase domain containing 4	ProteinCoding	-1.13041	0.456785	0.0121191	0.287391	8.18447	9.31488	8.04601	8.05565	8.45173	10.6952	8.42185	8.82758
ENSMUSG00000021228	Acot3	acyl-CoA thioesterase 3	ProteinCoding	-1.21768	0.429975	0.00907784	0.256268	4.69645	5.91413	4.68279	5.0083	4.39827	6.54487	4.79963	6.39788
ENSMUSG00000027605	Acss2	acyl-CoA synthetase short-chain family member 2	ProteinCoding	-0.821662	0.56579	0.0105858	0.272805	6.6126	7.43427	6.27232	6.56306	7.00243	7.64033	7.00164	7.66084
ENSMUSG00000024397	Aif1	allograft inflammatory factor 1	ProteinCoding	-1.62659	0.323852	0.00836437	0.247368	3.27044	4.89703	3.42277	2.9873	3.40124	2.55127	3.92742	8.2124
ENSMUSG00000029994	Anxa4	annexin A4	ProteinCoding	-1.456	0.364503	0.0412326	0.427702	0.891373	2.34737	0.805704	0.900133	0.968284	0.85619	0.839735	5.34619
ENSMUSG00000020609	Apob	apolipoprotein B	ProteinCoding	-1.93496	0.261529	0.0210161	0.347573	5.38678	7.32173	5.6757	3.80669	6.67793	8.99847	6.36354	6.60318
ENSMUSG00000019987	Arg1	arginase, liver	ProteinCoding	-1.0427	0.485417	0.031952	0.394832	4.10331	5.14602	3.77778	3.89334	4.63882	5.87105	4.67137	4.89563
ENSMUSG00000074794	Arrdc3	arrestin domain containing 3	ProteinCoding	-0.809972	0.570393	0.0291671	0.384586	6.73628	7.54625	6.70354	6.4815	7.0238	6.94659	8.31142	7.38074
ENSMUSG00000028207	Asph	aspartate-beta-hydroxylase	ProteinCoding	-1.1446	0.452315	0.0132823	0.298247	8.91774	10.0623	9.16106	9.38931	8.20285	10.7376	10.4443	9.00519
ENSMUSG00000038539	Atf5	activating transcription factor 5	ProteinCoding	-1.58053	0.33436	0.00088408	0.0733347	8.26725	9.84777	8.68265	7.37896	8.74013	9.1211	10.1119	10.3103
ENSMUSG00000027496	Aurka	aurora kinase A	ProteinCoding	-2.41661	0.187296	0.0326474	0.396955	0.322761	2.73937	0	0	0.968284	1.38984	0.839735	5.98854
ENSMUSG00000029761	Cald1	caldesmon 1	ProteinCoding	-0.882426	0.542455	0.0236638	0.360128	7.19292	8.07535	6.95907	7.44499	7.17469	7.35632	9.01094	7.85877
ENSMUSG00000029068	Ccnl2	cyclin L2	ProteinCoding	-1.36438	0.388402	0.00799293	0.242741	7.77595	9.14033	7.88186	7.28592	8.16008	8.48837	10.7844	8.14827
ENSMUSG00000025510	Cd151	CD151 antigen	ProteinCoding	-1.37012	0.386858	0.0377122	0.415599	4.68459	6.05471	3.99639	5.79631	4.26106	6.58194	5.94973	5.63244
ENSMUSG00000005087	Cd44	CD44 antigen	ProteinCoding	-1.36583	0.388012	0.0186038	0.335187	2.31006	3.67589	2.24488	2.41446	2.27084	7.66933	1.36706	1.99127
ENSMUSG00000023067	Cdkn1a	cyclin-dependent kinase inhibitor 1A (P21)	ProteinCoding	-0.912386	0.531306	0.0127321	0.293516	5.7736	6.68598	5.69666	5.49755	6.12658	6.05811	7.1534	6.84644
ENSMUSG00000026031	Cflar	CASP8 and FADD-like apoptosis regulator	ProteinCoding	-1.2238	0.428153	0.00804857	0.243135	3.52745	4.75125	3.20601	3.97508	3.40124	5.06221	4.95463	4.2369
ENSMUSG00000031502	Col4a1	collagen, type IV, alpha 1	ProteinCoding	-0.983791	0.505649	9.67e-06	0.00285024	9.20512	10.1889	9.04123	9.52442	9.04972	10.1458	9.99063	10.4303
ENSMUSG00000078937	Cpt1b	carnitine palmitoyltransferase 1b, muscle	ProteinCoding	-1.80491	0.286198	0.0472904	0.444347	3.22521	5.03012	1.31962	4.60812	3.74789	6.6417	6.87146	1.57721
ENSMUSG00000040713	Creg1	cellular repressor of E1A-stimulated genes 1	ProteinCoding	-2.39191	0.190529	0.0319087	0.394528	2.44408	4.836	2.24488	0.900133	4.18723	5.724	5.79418	2.98982
ENSMUSG00000061353	Cxcl12	chemokine (C-X-C motif) ligand 12	ProteinCoding	-2.13619	0.22748	0.0411703	0.427401	6.26637	8.40256	5.34497	6.99402	6.46013	6.15971	12.2913	6.75665
ENSMUSG00000003555	Cyp17a1	cytochrome P450, family 17, subfamily a, polypeptide 1	ProteinCoding	-2.20368	0.217083	0.0187636	0.336348	0	2.20368	0	0	0	2.08441	1.36706	3.15958
ENSMUSG00000029433	Diablo	diablo, IAP-binding mitochondrial protein	ProteinCoding	-1.18162	0.440857	0.00028887	0.0363175	5.64409	6.8257	5.29086	5.72722	5.91418	6.83839	6.43112	7.2076
ENSMUSG00000057531	Dtnbp1	dystrobrevin binding protein 1	ProteinCoding	-3.5243	0.0869122	0.00061917	0.0597553	0.268568	3.79287	0.805704	0	0	5.63271	2.0562	3.68969
ENSMUSG00000030208	Emp1	epithelial membrane protein 1	ProteinCoding	-1.92136	0.264005	0.0364767	0.410307	0	1.92136	0	0	0	2.08441	1.36706	2.31262
ENSMUSG00000021709	Erbin	Erbb2 interacting protein	ProteinCoding	-1.00321	0.498887	0.00886283	0.253476	11.2472	12.2504	11.4783	11.46	10.8032	13.0696	12.4142	11.2674
ENSMUSG00000027249	F2	coagulation factor II	ProteinCoding	-1.39381	0.380557	0.0247257	0.363537	3.03191	4.42573	3.52004	2.63167	2.94403	6.05811	2.70665	4.51242
ENSMUSG00000033579	Fa2h	fatty acid 2-hydroxylase	ProteinCoding	-1.22867	0.42671	0.00017599	0.0259035	11.3909	12.6196	10.7724	11.6274	11.7731	12.854	12.8184	12.1865
ENSMUSG00000070047	Fat1	FAT atypical cadherin 1	ProteinCoding	-2.11686	0.230548	0.00342047	0.161846	9.12875	11.2456	10.5856	8.43002	8.37067	11.0436	11.4641	11.2292
ENSMUSG00000028088	Fmo5	flavin containing monooxygenase 5	ProteinCoding	-1.58686	0.332895	0.00026369	0.0339783	5.55076	7.13762	5.94457	5.15581	5.5519	7.02945	6.4702	7.91322
ENSMUSG00000075415	Fnbp1	formin binding protein 1	ProteinCoding	-1.21159	0.431793	0.0121021	0.287329	5.27404	6.48563	4.84177	6.13543	4.84493	6.53229	6.44426	6.48034
ENSMUSG00000010803	Gabra1	gamma-aminobutyric acid (GABA) A receptor, subunit alpha 1	ProteinCoding	-2.38473	0.191481	3.43e-10	2.68e-07	8.97269	11.3574	8.37986	8.96565	9.57256	11.6645	11.5732	10.8346
ENSMUSG00000006345	Ggt1	gamma-glutamyltransferase 1	ProteinCoding	-4.0871	0.0588381	2.35e-05	0.00584025	1.8522	5.9393	2.80405	0	2.75255	6.86871	4.2603	6.68891
ENSMUSG00000032562	Gnai2	guanine nucleotide binding protein (G protein), alpha inhibiting 2	ProteinCoding	-0.820744	0.56615	0.00810447	0.243962	10.8603	11.681	10.6879	11.0181	10.8747	10.8317	12.0972	12.1141
ENSMUSG00000025934	Gsta3	glutathione S-transferase, alpha 3	ProteinCoding	-3.27919	0.103007	8.31e-07	0.00036745	1.38014	4.65933	1.69777	0.900133	1.54252	4.79381	3.7693	5.41489
ENSMUSG00000028763	Hspg2	perlecan (heparan sulfate proteoglycan 2)	ProteinCoding	-1.86647	0.274244	0.00055765	0.056086	9.55065	11.4171	10.6708	8.99534	8.98583	11.3965	11.4339	11.4209
ENSMUSG00000036117	Il5	interleukin 5	ProteinCoding	-3.38106	0.0959838	5.6e-05	0.0111786	0	3.38106	0	0	0	3.7174	3.85053	2.57526
ENSMUSG00000020758	Itgb4	integrin beta 4	ProteinCoding	-1.24564	0.42172	0.00023052	0.0310753	9.56015	10.8058	9.28732	9.83881	9.55432	11.1081	11.2765	10.0328
ENSMUSG00000038319	Kcnh2	potassium voltage-gated channel, subfamily H (eag-related), member 2	ProteinCoding	-1.83598	0.280101	0.0284934	0.382287	5.58198	7.41796	6.57361	6.42444	3.74789	7.60474	7.53142	7.11772
ENSMUSG00000030087	Klf15	Kruppel-like factor 15	ProteinCoding	-0.936214	0.522602	0.0476216	0.44464	3.24804	4.18426	3.20601	3.13687	3.40124	4.70696	3.7693	4.0765
ENSMUSG00000022875	Kng1	kininogen 1	ProteinCoding	-2.84169	0.139498	0.0460203	0.440525	0	2.84169	0	0	0	5.53525	0	2.98982
ENSMUSG00000003123	Lipe	lipase, hormone sensitive	ProteinCoding	-2.44554	0.183577	0.0311573	0.391519	0.591329	3.03687	0.805704	0	0.968284	0.85619	0.839735	7.41469
ENSMUSG00000018819	Lsp1	lymphocyte specific 1	ProteinCoding	-4.4793	0.0448329	1.24e-07	6.45e-05	0.719548	5.19885	0	2.15864	0	5.76756	5.44774	4.38123
ENSMUSG00000079487	Med12	mediator complex subunit 12	ProteinCoding	-2.91555	0.132536	0.0013738	0.0952169	6.3961	9.31165	4.84177	8.01758	6.32895	10.5846	9.73258	7.61777
ENSMUSG00000015950	Ncf1	neutrophil cytosolic factor 1	ProteinCoding	-3.17383	0.11081	0.0339964	0.401833	4.24329	7.41712	6.7241	2.15864	3.84711	7.76916	6.67362	7.80859
ENSMUSG00000024589	Nedd4l	neural precursor cell expressed, developmentally down-regulated gene 4-like	ProteinCoding	-1.56567	0.337822	0.0378986	0.416003	7.74947	9.31514	7.88642	8.0079	7.35409	7.70898	12.4798	7.75659
ENSMUSG00000067786	Nnat	neuronatin	ProteinCoding	-1.77513	0.292168	0.0182443	0.333634	3.38473	5.15986	2.64062	2.82042	4.69317	5.19578	1.75239	8.53142
ENSMUSG00000029361	Nos1	nitric oxide synthase 1, neuronal	ProteinCoding	-0.902335	0.53502	0.00862255	0.250319	5.33257	6.23491	5.17616	5.79631	5.02525	6.20794	6.50824	5.98854
ENSMUSG00000015094	Npdc1	neural proliferation, differentiation and control 1	ProteinCoding	-0.966183	0.511859	0.018735	0.336071	5.99666	6.96284	6.15607	5.72722	6.10669	7.22965	7.71614	5.94274
ENSMUSG00000022809	Nr1i2	nuclear receptor subfamily 1, group I, member 2	ProteinCoding	-1.51196	0.350634	0.0168899	0.323991	2.78074	4.2927	3.08406	2.9873	2.27084	5.80985	3.49395	3.57429
ENSMUSG00000005677	Nr1i3	nuclear receptor subfamily 1, group I, member 3	ProteinCoding	-3.3735	0.0964884	0.0199832	0.342073	0	3.3735	0	0	0	5.74594	4.37456	0
ENSMUSG00000039196	Orm1	orosomucoid 1	ProteinCoding	-2.61416	0.163328	0.00256104	0.138062	0	2.61416	0	0	0	2.73807	2.30702	2.79738
ENSMUSG00000021111	Papola	poly (A) polymerase alpha	ProteinCoding	-0.873884	0.545676	0.00192925	0.117319	7.22305	8.09693	7.58862	6.96431	7.11622	8.36969	7.85056	8.07055
ENSMUSG00000004791	Pgf	placental growth factor	ProteinCoding	-1.07416	0.474947	0.0390274	0.419504	5.17629	6.25045	5.79711	4.88683	4.84493	7.41914	6.02165	5.31057
ENSMUSG00000040430	Pitpnc1	phosphatidylinositol transfer protein, cytoplasmic 1	ProteinCoding	-1.84963	0.277464	0.0170305	0.324903	1.96271	3.81233	2.45628	0.900133	2.53171	4.95323	3.49395	2.98982
ENSMUSG00000030701	Plekhb1	pleckstrin homology domain containing, family B (evectins) member 1	ProteinCoding	-0.921495	0.527962	0.0416865	0.428596	11.7573	12.6788	11.2323	11.6415	12.3981	12.7321	14.0913	11.213
ENSMUSG00000031775	Pllp	plasma membrane proteolipid	ProteinCoding	-1.00106	0.499632	0.0136815	0.300635	11.4752	12.4763	11.2704	11.1233	12.0319	13.1044	12.8812	11.4432
ENSMUSG00000052151	Plpp2	phospholipid phosphatase 2	ProteinCoding	-4.06681	0.0596718	1.98e-06	0.00075849	0	4.06681	0	0	0	3.30929	5.09459	3.79654
ENSMUSG00000017754	Pltp	phospholipid transfer protein	ProteinCoding	-0.925965	0.526328	0.0444294	0.436036	10.0677	10.9937	10.5471	10.3107	9.34534	10.8025	10.0206	12.158
ENSMUSG00000027750	Postn	periostin, osteoblast specific factor	ProteinCoding	-1.3364	0.396007	0.00486122	0.193533	6.19489	7.53129	6.86962	5.35216	6.36288	7.43274	7.25386	7.90727
ENSMUSG00000021948	Prkcd	protein kinase C, delta	ProteinCoding	-3.07605	0.118582	0.00688057	0.228063	0.891373	3.96742	0.805704	0.900133	0.968284	3.05177	0.839735	8.01077
ENSMUSG00000029086	Prom1	prominin 1	ProteinCoding	-1.84323	0.278698	2.04e-07	0.00010184	7.56715	9.41037	8.12544	7.40131	7.17469	9.7038	8.9729	9.55442
ENSMUSG00000036503	Rnf13	ring finger protein 13	ProteinCoding	-0.89423	0.538034	0.0178078	0.330445	10.4187	11.3129	10.3693	10.1778	10.709	10.721	12.3506	10.8672
ENSMUSG00000020458	Rtn4	reticulon 4	ProteinCoding	-1.25614	0.418663	0.0391353	0.419916	6.62403	7.88017	6.24412	6.0053	7.62267	9.66832	6.98374	6.98845
ENSMUSG00000064329	Scn1a	sodium channel, voltage-gated, type I, alpha	ProteinCoding	-2.1403	0.226833	1.63e-05	0.00442806	9.17102	11.3113	9.53725	9.17255	8.80327	12.1296	12.0881	9.71629
ENSMUSG00000023033	Scn8a	sodium channel, voltage-gated, type VIII, alpha	ProteinCoding	-1.16972	0.444506	0.00111157	0.0846579	5.72235	6.89208	5.83542	5.75062	5.58102	7.16595	6.15553	7.35475
ENSMUSG00000005089	Slc1a2	solute carrier family 1 (glial high affinity glutamate transporter), member 2	ProteinCoding	-1.926	0.263158	0.0186711	0.335737	4.25424	6.18024	3.31846	3.80669	5.63756	8.10258	5.12755	5.31057
ENSMUSG00000023942	Slc29a1	solute carrier family 29 (nucleoside transporters), member 1	ProteinCoding	-1.21778	0.429944	0.00716208	0.232073	8.92471	10.1425	9.78487	8.48337	8.50588	10.2826	9.92651	10.2184
ENSMUSG00000019558	Slc6a8	solute carrier family 6 (neurotransmitter transporter, creatine), member 8	ProteinCoding	-1.0432	0.485248	0.0492769	0.448252	10.4341	11.4773	9.39222	10.9478	10.9624	13.0254	11.0259	10.3807
ENSMUSG00000041698	Slco1a1	solute carrier organic anion transporter family, member 1a1	ProteinCoding	-1.35507	0.390917	0.0326546	0.396955	1.56987	2.92494	1.31962	1.84748	1.54252	5.83054	1.36706	1.57721
ENSMUSG00000025060	Slk	STE20-like kinase	ProteinCoding	-1.91639	0.264917	0.00277382	0.144154	2.68686	4.60324	2.24488	2.41446	3.40124	3.42264	5.31093	5.07616
ENSMUSG00000025006	Sorbs1	sorbin and SH3 domain containing 1	ProteinCoding	-1.39272	0.380847	0.00102038	0.0802473	7.39114	8.78386	7.61638	7.17787	7.37918	9.42646	9.30735	7.61777
ENSMUSG00000029304	Spp1	secreted phosphoprotein 1	ProteinCoding	-1.58251	0.333899	0.00302833	0.152364	5.68994	7.27245	5.29086	6.34979	5.42917	8.0462	5.91239	7.85877
ENSMUSG00000030852	Tacc2	transforming, acidic coiled-coil containing protein 2	ProteinCoding	-3.12447	0.114667	0.0349255	0.405251	2.78409	5.90857	2.45628	2.63167	3.26433	10.151	4.00042	3.57429
ENSMUSG00000053477	Tcf4	transcription factor 4	ProteinCoding	-2.81279	0.14232	1.72e-08	1.09e-05	4.39856	7.21135	4.18618	3.7145	5.29501	6.7214	7.48129	7.43137
ENSMUSG00000024985	Tcf7l2	transcription factor 7 like 2, T cell specific, HMG box	ProteinCoding	-0.970467	0.510341	0.0224036	0.354299	6.25583	7.22629	6.32711	6.39504	6.04533	5.91045	7.95984	7.80859
ENSMUSG00000006386	Tek	endothelial-specific receptor tyrosine kinase	ProteinCoding	-0.835473	0.560399	0.0114056	0.280058	7.84133	8.67681	8.13315	7.24532	8.14553	8.736	8.8022	8.49221
ENSMUSG00000047407	Tgif1	TGFB-induced factor homeobox 1	ProteinCoding	-1.54254	0.34328	0.0271087	0.374641	1.24604	2.78858	1.31962	1.45021	0.968284	6.00449	1.36706	0.994189
ENSMUSG00000024924	Vldlr	very low density lipoprotein receptor	ProteinCoding	-0.976408	0.508244	0.0268652	0.373485	7.79539	8.7718	7.78732	7.94843	7.65041	10.3414	7.46204	8.51195
ENSMUSG00000025860	Xiap	X-linked inhibitor of apoptosis	ProteinCoding	-2.00439	0.249241	0.0020998	0.123126	8.30722	10.3116	8.05415	9.48833	7.37918	11.0867	9.29652	10.5516
